# Supplementary material for: Crosstalk between nitric oxide and retinoic acid pathways is essential for amphioxus pharynx development
Source: PubMed Central journal article supplement (PMC8387019; doi:10.7554/elife.58295), 2021-08-25
Supplement: elife-58295-transrepform.pdf [file elife-58295-transrepform.pdf]

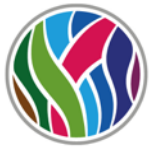

## eLife's transparent reporting form

We encourage authors to provide detailed information *within their submission* to facilitate the interpretation and replication of experiments. Authors can upload supporting documentation to indicate the use of appropriate reporting guidelines for health-related research (see [EQUATOR Network](#)), life science research (see the [BioSharing Information Resource](#)), or the [ARRIVE guidelines](#) for reporting work involving animal research. Where applicable, authors should refer to any relevant reporting standards documents in this form.

If you have any questions, please consult our Journal Policies and/or contact us: [editorial@elifesciences.org](mailto:editorial@elifesciences.org).

### Sample-size estimation

- You should state whether an appropriate sample size was computed when the study was being designed
- You should state the statistical method of sample size computation and any required assumptions
- If no explicit power analysis was used, you should describe how you decided what sample (replicate) size (number) to use

Please outline where this information can be found within the submission (e.g., sections or figure legends), or explain why this information doesn't apply to your submission:

Sample-size estimation is not applicable to the data included in our manuscript.

### Replicates

- You should report how often each experiment was performed
- You should include a definition of biological versus technical replication
- The data obtained should be provided and sufficient information should be provided to indicate the number of independent biological and/or technical replicates
- If you encountered any outliers, you should describe how these were handled
- Criteria for exclusion/inclusion of data should be clearly stated
- High-throughput sequence data should be uploaded before submission, with a private link for reviewers provided (these are available from both GEO and ArrayExpress)

Please outline where this information can be found within the submission (e.g., sections or figure legends), or explain why this information doesn't apply to your submission:

For biological replicates we used eggs from different females fertilized with a mix of two or three different males. For pharmacological treatments, control and treated embryos were taken from the same biological replica. All the treatments were performed on biological triplicates, while rescue experiments were done on biological duplicates as reported in Materials & Methods section. Treatments were performed in petri dishes ( $\varnothing$  60 mm) with a final volume of sea water of 5 ml. Drugs and DMSO (control vehicle) were added at desired concentration as indicated in Materials & Methods section.



For each sample we used 500 embryos. For rescue experiments, larvae were analysed for the presence/absence of the wild-type phenotype. In Figure 3A, the number of “total observed larvae” and the percentage of observed phenotypes indicate the average of two biological replicates.

### Statistical reporting

- Statistical analysis methods should be described and justified
- Raw data should be presented in figures whenever informative to do so (typically when N per group is less than 10)
- For each experiment, you should identify the statistical tests used, exact values of N, definitions of center, methods of multiple test correction, and dispersion and precision measures (e.g., mean, median, SD, SEM, confidence intervals; and, for the major substantive results, a measure of effect size (e.g., Pearson's r, Cohen's d)
- Report exact p-values wherever possible alongside the summary statistics and 95% confidence intervals. These should be reported for all key questions and not only when the p-value is less than 0.05.

Please outline where this information can be found within the submission (e.g., sections or figure legends), or explain why this information doesn't apply to your submission:

All details about the statistical analyses performed are reported in “RNA-seq analysis” and “Gene expression analysis by qRT-PCR” paragraphs of Materials & Methods section. All the p-values are reported in the ‘Source data’ Excel file.

(For large datasets, or papers with a very large number of statistical tests, you may upload a single table file with tests, Ns, etc., with reference to sections in the manuscript.)

### Group allocation

- Indicate how samples were allocated into experimental groups (in the case of clinical studies, please specify allocation to treatment method); if randomization was used, please also state if restricted randomization was applied
- Indicate if masking was used during group allocation, data collection and/or data analysis

Please outline where this information can be found within the submission (e.g., sections or figure legends), or explain why this information doesn't apply to your submission:

No selection was done to allocate embryos into either control or pharmacological treatment groups, and no exclusion of any embryo was done during the duration or at the end of experiments.

### Additional data files (“source data”)

- We encourage you to upload relevant additional data files, such as numerical data that are represented as a graph in a figure, or as a summary table
- Where provided, these should be in the most useful format, and they can be uploaded as “Source data” files linked to a main figure or table
- Include model definition files including the full list of parameters used
- Include code used for data analysis (e.g., R, MatLab)
- Avoid stating that data files are “available upon request”

Please indicate the figures or tables for which source data files have been provided:

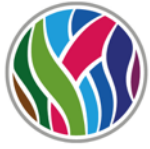

eLIFE

Westbrook Centre, Milton Road

Cambridge CB4 1YG

UK

P 01223 855340

W [elifesciences.org](http://elifesciences.org)

T @elife

Raw data used to prepare the graphs in Figure 1C, Figure 2B-E and Figure 1-figure supplement 2 are provided as 'Source data' Excel files.
