# Supplementary material for: Crosstalk between nitric oxide and retinoic acid pathways is essential for amphioxus pharynx development
Source: eLife. 2021 Aug 25;10:e58295. doi: 10.7554/eLife.58295 (PMC8387019; doi:10.7554/eLife.58295)
Supplement: Figure 1—source data 1. [file elife-58295-fig1-data1.xlsx]

## Sheet: Foglio 1 - DESeq2_Treated_vs_Co
DESeq2_Treated_vs_Control_final_20
	baseMean	log2FoldChange	lfcSE	stat	pvalue	padj
ContigAmph260	1119.6691363651	3.29285727554045	0.209132929164025	15.7452835796979	7.39986471895688e-56	3.82454608134567e-51
ContigAmph12477	699.771757286802	3.52358935637508	0.233587301525234	15.0846785478809	2.04267038134731e-51	5.27866879947773e-47
ContigAmph54070	406.179236095341	5.29728476684452	0.354036928755947	14.9625203942953	1.29044699251252e-50	2.22318207870057e-46
ContigAmph54236	903.87637820551	3.60387752561133	0.241627023160859	14.9150433526307	2.63106334654552e-50	3.39959695007147e-46
ContigAmph10363	538.660784298651	4.10021919110523	0.275681455877996	14.8730322757719	4.93275885090236e-50	5.09889416900075e-46
ContigAmph18637	306.269027241874	4.33422402178747	0.29357379450918	14.7636611402383	2.51262451175658e-49	2.16437475442712e-45
ContigAmph23762	375.059527455062	5.48687460140747	0.428323780238458	12.8101096753321	1.43930986848834e-37	1.06270416061359e-33
ContigAmph68764	236.387605396804	3.68903198439628	0.296269996301557	12.4515881812123	1.37089742340807e-35	8.85668280392785e-32
ContigAmph7121	640.344892729348	2.83343895100634	0.231614062136286	12.2334495793226	2.06000767645408e-34	1.06469436749853e-30
ContigAmph33200	438.159449503685	3.05228388293279	0.249401734654606	12.2384228287741	1.93761174733692e-34	1.06469436749853e-30
ContigAmph33338	427.274369082136	3.05074260287609	0.266098192230791	11.4647250223712	1.98388709229161e-30	9.32138367981812e-27
ContigAmph72515	116.671094109294	5.09756647702177	0.468480074362007	10.8810742569229	1.41880918207378e-27	6.11081114719179e-24
ContigAmph65761	151.869606274376	3.5046000665845	0.326740237306982	10.7259518921504	7.68912525670475e-27	3.05695961359637e-23
ContigAmph26286	169.676214823729	2.54294287647195	0.246958077478385	10.2970629769926	7.26454469608132e-25	2.68186234337333e-21
ContigAmph19717	269.609899855177	2.73499750702951	0.267729189736479	10.2155372364198	1.68940680525565e-24	5.82102008818887e-21
ContigAmph66086	82.8200897466814	4.42150414615589	0.434455062920511	10.1771265281925	2.50859716089131e-24	8.10339597896914e-21
ContigAmph21647	385.76787266763	2.33890648900043	0.243538632635049	9.60384175477146	7.70189587842065e-22	2.34155756811937e-18
ContigAmph33863	1881.63615854662	2.07148421773402	0.217251831491773	9.53494478509132	1.4996535009927e-21	4.30600508585038e-18
ContigAmph26176	5835.74330125647	3.43486361900963	0.361148763511878	9.51093833357859	1.88950382404108e-21	5.13984819167047e-18
ContigAmph21947	76.8301820436667	4.56614898960041	0.48052186860563	9.50247905022591	2.04951944807156e-21	5.29636815770653e-18
ContigAmph2862	175.13167783112	2.29759665604638	0.244483951814887	9.39774017472535	5.57474900456309e-21	1.37202536929447e-17
ContigAmph81635	238.066373504814	2.37826257477937	0.255154987011246	9.32085475826718	1.15406780563693e-20	2.6854244925683e-17
ContigAmph85852	286.341609875251	2.27147869047033	0.243795380505619	9.31715230107886	1.19504611347943e-20	2.6854244925683e-17
ContigAmph79878	159.471621199574	3.23142266103107	0.351453776751977	9.19444568470666	3.76932955423092e-20	8.11725119503629e-17
ContigAmph37401	1084.15625796225	3.31673215123733	0.365843441160304	9.06598773704411	1.2348034058455e-19	2.55278316910876e-16
ContigAmph89427	57.5038552952757	4.91770677208003	0.554703887069703	8.86546297351271	7.61868309845251e-19	1.51447698946315e-15
ContigAmph96693	104.410850336302	2.82831558855303	0.329270900114276	8.5896311747301	8.72489442741561e-18	1.67013867995018e-14
ContigAmph3608	127.053299243972	2.80830682313242	0.335165511870592	8.37886573549583	5.34401930764944e-17	9.86429621059121e-14
ContigAmph89787	128.915426793775	2.29616263474176	0.278006727353161	8.25937795319922	1.46433571977501e-16	2.60974921865006e-13
ContigAmph2110	379.995131844375	1.91934310536198	0.232751352253334	8.24632418578993	1.63341165938243e-16	2.81404160678405e-13
ContigAmph2109	804.478009348208	1.88394444452502	0.228740339877787	8.23617052213696	1.77810450573041e-16	2.96450171852163e-13
ContigAmph40612	59.6522741248815	3.98068917843601	0.488349017519271	8.15132013300082	3.59972783493275e-16	5.81401041939576e-13
ContigAmph10607	2446.34049170203	2.33222394581134	0.287660763620347	8.10754972787807	5.16507321266584e-16	8.08944375525519e-13
ContigAmph78179	144.621909636154	2.54087384433689	0.31745126429043	8.00398086306658	1.20460119182663e-15	1.83113552936375e-12
ContigAmph18607	141.800139617791	3.26289322250256	0.409524135879205	7.96752361249105	1.61885535543022e-15	2.39054057685874e-12
ContigAmph3379	416.884814807274	2.09447319165408	0.263180969279543	7.95830031855151	1.74418594819742e-15	2.50406962629543e-12
ContigAmph85682	162.294080723774	2.42607400396075	0.305424422697172	7.94328751622526	1.96891840129494e-15	2.7503129365548e-12
ContigAmph11372	166.733611461348	2.36865849777569	0.302660852399748	7.82611454040056	5.03178935690494e-15	6.84376318742829e-12
ContigAmph2108	991.189608592446	1.81616687668703	0.23277037572332	7.8023969804723	6.07422115934096e-15	8.04974477947123e-12
ContigAmph7852	476.600088569997	1.75413370874856	0.22507604033013	7.79351594321499	6.51698540576647e-15	8.42059684279086e-12
ContigAmph37740	104.825989144569	3.19701935809832	0.410849784713324	7.78147993999579	7.16809981205706e-15	9.03600172405749e-12
ContigAmph9673	544.861776461106	2.06792746192941	0.266096559339222	7.77134235431133	7.76586881876624e-15	9.55645628640749e-12
ContigAmph88903	426.751993625726	7.34145876487072	0.945432560015699	7.76518503313321	8.15261174162278e-15	9.79906012218678e-12
ContigAmph91919	240.674791781389	1.7657104835786	0.229128405857487	7.70620507296174	1.29614288121254e-14	1.52249656074065e-11
ContigAmph24847	165.331904651609	2.94421404478692	0.382877576633005	7.68970089781204	1.47479391347228e-14	1.69384996942003e-11
ContigAmph56288	39.2318626941375	4.32506658862663	0.564842156226457	7.65712427967685	1.90142613081659e-14	2.13637626402445e-11
ContigAmph34928	64.395430921654	3.15148245445966	0.416255547506836	7.57102811802863	3.70281887406109e-14	4.03014168137873e-11
ContigAmph92655	53.8435621746447	4.16386066344848	0.550074501040215	7.56963039656344	3.74287595205825e-14	4.03014168137873e-11
ContigAmph5114	158.770710948452	2.21586524835749	0.294632018304205	7.52078902052536	5.4446649801023e-14	5.7428992822777e-11
ContigAmph19451	545.278589069837	1.93136973805889	0.258629841123924	7.46769873756936	8.16094173280411e-14	8.43580225036495e-11
ContigAmph6581	287.443151883461	2.16703092220498	0.291132535578394	7.44345154656015	9.80880898809665e-14	9.94036242628994e-11
ContigAmph82329	41.4142993540681	4.78683300086621	0.647462749924023	7.39321760429912	1.43317642650738e-13	1.42446712360784e-10
ContigAmph37743	69.7633161712736	3.29368155689802	0.446420191016384	7.37798518789921	1.6070284159172e-13	1.56712559713707e-10
ContigAmph6706	574.809321172945	1.83845511582293	0.250360166073234	7.34324131773085	2.08482134607788e-13	1.99540567501276e-10
ContigAmph73679	79.5274910485979	2.3694843396538	0.325671984321922	7.27567753359956	3.44686058765027e-13	3.23904622931121e-10
ContigAmph6370	403.853070372981	1.61554874048729	0.223183684910117	7.23865071561087	4.53170430917943e-13	4.18243938420768e-10
ContigAmph28170	79.91047618967	2.42127988252346	0.335175999339469	7.22390591001466	5.05152154564202e-13	4.50142826836142e-10
ContigAmph33363	1320.77483423492	1.66281130712002	0.23013525979349	7.22536524221509	4.99756825255798e-13	4.50142826836142e-10
ContigAmph62821	244.219585792798	1.95517462536885	0.270885484209236	7.21771648664145	5.28677918041747e-13	4.6312185620457e-10
ContigAmph95394	222.63413507097	1.71859055382201	0.239031054861302	7.18982123397824	6.48762087328856e-13	5.58843662025076e-10
ContigAmph91545	1852.53191239142	7.35207118652273	1.04381113799545	7.04348796338936	1.87486204058727e-12	1.58853065091332e-09
ContigAmph7274	3678.65593259975	1.59115542654418	0.226387747638338	7.02845203922477	2.08837381544262e-12	1.74089535931187e-09
ContigAmph23046	270.241157304015	-2.02351288700977	0.288995869224693	-7.00187477571351	2.5255977697503e-12	2.07195230367896e-09
ContigAmph3673	856.226780810308	1.838422374481	0.264647831858586	6.94667461119939	3.7399695806693e-12	3.02025918448925e-09
ContigAmph27645	77.0537557375587	2.60788584983128	0.377654933275351	6.90547274786916	5.00365139744474e-12	3.97859567423899e-09
ContigAmph14433	72.2871140160424	2.22706246429587	0.328958577591734	6.77003919642384	1.28747510536857e-11	1.00821005069499e-08
ContigAmph27807	53.6259997463346	2.61548082267808	0.388656053206154	6.72955123457387	1.70187154667025e-11	1.312828791315e-08
ContigAmph22573	287.164870168171	1.758222984347	0.262317518263744	6.70265179384328	2.04670782502545e-11	1.55561834159729e-08
ContigAmph10853	302.530361254762	1.99662314760984	0.2988242492087	6.68159680111966	2.36352573452637e-11	1.74509234376087e-08
ContigAmph64588	45.2094149959857	3.24175379999126	0.485086298984735	6.68283933554939	2.34356471175483e-11	1.74509234376087e-08
ContigAmph71298	69.5897984324592	3.53811968800094	0.539239870205817	6.56130950897699	5.33372812838355e-11	3.88265358573768e-08
ContigAmph57547	64.1988684008709	3.74427274266505	0.573391842015589	6.53004188113868	6.57513028986071e-11	4.71984769307168e-08
ContigAmph23337	279.863550070173	1.25699855830661	0.192795634091062	6.51984970631078	7.03778733682279e-11	4.98275343447053e-08
ContigAmph10219	275.635053388413	4.63791913924311	0.716441329985517	6.47355051297343	9.57263914437236e-11	6.6858416424019e-08
ContigAmph16704	181.129319677949	1.92047943987096	0.299756703042492	6.40679397784381	1.48611415365032e-10	1.02411098556351e-07
ContigAmph7721	1912.57959459554	1.24050131763155	0.19416584162137	6.38887513515671	1.67110439315938e-10	1.13643894021118e-07
ContigAmph23059	451.507114550861	1.74751586908373	0.274181466500664	6.3735740106252	1.84673093487505e-10	1.23956417711795e-07
ContigAmph23235	173.437918289636	1.80932161235247	0.284399103455688	6.36191039411762	1.99259682753522e-10	1.32032531326065e-07
ContigAmph617	1294.55116823394	1.6499086697683	0.262803680263567	6.27810336641255	3.42728043054004e-10	2.24222230091179e-07
ContigAmph95715	180.045064590766	4.66751581615028	0.744254010710745	6.27140163032902	3.57812327622083e-10	2.31164654260247e-07
ContigAmph6128	559.531082909566	1.13528483101572	0.181720842695269	6.24741121699231	4.17311345141634e-10	2.63028287345124e-07
ContigAmph27521	480.92923446461	2.09382700859084	0.335114084211957	6.24810208593473	4.15470106507418e-10	2.63028287345124e-07
ContigAmph25180	772.708473830835	1.92733204870846	0.308953645776769	6.23825636969836	4.42475075825285e-10	2.73042431362782e-07
ContigAmph35475	96.0660406733228	3.12848826090266	0.501537058802273	6.23780078858748	4.43765270382975e-10	2.73042431362782e-07
ContigAmph96484	166.579238283901	1.81054134890229	0.29110863073359	6.21946983962566	4.98837494667479e-10	3.03316671463459e-07
ContigAmph50959	49.0082646763359	2.50217662302773	0.402939916105443	6.20980082393465	5.30517996011641e-10	3.18828977975182e-07
ContigAmph35218	99.3942694631613	2.10840877307194	0.339825489225865	6.20438678062371	5.4910587635011e-10	3.26206759922748e-07
ContigAmph46595	191.192466405811	1.99803928152747	0.324072616822491	6.16540607817504	7.03024886252766e-10	4.12899297966909e-07
ContigAmph43667	31.7457085206829	4.72919784502578	0.76895306301909	6.15017752378519	7.73962691027035e-10	4.49454918236419e-07
ContigAmph3991	129.449429309481	2.80326651361799	0.458613503627824	6.1124814063323	9.80937400209348e-10	5.63319651026888e-07
ContigAmph7270	350.72005660437	1.26652398451899	0.209210057363808	6.05383890467824	1.41434055211618e-09	8.03283264786512e-07
ContigAmph47385	33.5494951986708	4.00167604830896	0.662841868200719	6.03715039783393	1.56859514518123e-09	8.81209472647247e-07
ContigAmph32568	65.7358465449729	2.26449092071767	0.377908338416902	5.99216976847842	2.0705960067736e-09	1.14894335596694e-06
ContigAmph86528	283.075397869363	1.94989626111055	0.325488217976589	5.9906815467305	2.08963461537211e-09	1.14894335596694e-06
ContigAmph17063	399.701912724046	1.47773367841773	0.247594562684901	5.96836078463628	2.39648995508404e-09	1.30379144040593e-06
ContigAmph13298	55.9953390250752	2.79074473045137	0.469583144582863	5.94302577221	2.79808421833673e-09	1.50641859104704e-06
ContigAmph71401	132.991544997509	1.41227316597828	0.239772026981604	5.89006642583306	3.86040416478311e-09	2.05691885415103e-06
ContigAmph6967	1873.85892533609	1.03113177849475	0.176297404646025	5.8488199560571	4.95072597573237e-09	2.61095225846686e-06
ContigAmph18102	114.37683388144	2.0337207160604	0.348096544235092	5.8424042115365	5.1452773198214e-09	2.68614659593585e-06
ContigAmph84569	263.031284948548	1.62261415706609	0.278238916312073	5.83172971837686	5.48557242359201e-09	2.83516325140929e-06
ContigAmph15497	622.806771118128	3.51973592149419	0.607448758100047	5.79429272767481	6.86096991077801e-09	3.51091454325397e-06
ContigAmph14945	307.886551761482	2.169485417397	0.374647322614483	5.7907404816274	7.00767837558605e-09	3.55083185454696e-06
ContigAmph7432	221.331691466553	1.40817077981037	0.243742049333673	5.77729933616273	7.59091687142020e-09	3.80901890856778e-06
ContigAmph17348	714.653593112091	1.3523931493542	0.235005705269396	5.75472475361353	8.67830757368061e-09	4.27171093941056e-06
ContigAmph27301	304.781570057278	1.72645789676121	0.299948542889793	5.75584692003504	8.62084810769291e-09	4.27171093941056e-06
ContigAmph19535	1266.9533514915	1.65876885642172	0.288701293580614	5.74562322131938	9.15830344132402e-09	4.43143879337316e-06
ContigAmph19837	614.538775223775	1.21241206226909	0.211025729106185	5.7453281521848	9.1742889654618e-09	4.43143879337316e-06
ContigAmph14378	233.054575481663	1.53285610406063	0.267204042834008	5.7366501187741	9.65674585790634e-09	4.57889222862414e-06
ContigAmph24558	88.2227297657417	1.9734211877091	0.34398159704649	5.7369964110097	9.63702983188649e-09	4.57889222862414e-06
ContigAmph88256	72.9633476526594	2.05472351535902	0.359322433819824	5.71832794717549	1.07577367649537e-08	5.05457151781696e-06
ContigAmph56913	71.5328265528199	2.00683599505664	0.35149068306046	5.70949982964824	1.13308670674082e-08	5.27589669830564e-06
ContigAmph85194	27.7188545072899	3.99685394321077	0.70537071375654	5.66631682498558	1.45899643944846e-08	6.73274749789768e-06
ContigAmph18689	76.3005083684282	1.90245991603531	0.336188067056953	5.65891565601886	1.52332391905946e-08	6.96738702943973e-06
ContigAmph32567	42.7589300459791	2.4748333367161	0.437619255047561	5.65522039574592	1.55646417373035e-08	7.05651704869117e-06
ContigAmph81417	754.780497586459	0.99681596662685	0.177875866026773	5.60399782664621	2.09463334566792e-08	9.41382868152181e-06
ContigAmph17930	335.542253620317	1.27540409390165	0.228002495015118	5.59381639142625	2.22131864382208e-08	9.8971235161466e-06
ContigAmph11861	3121.79570603563	0.865553806516298	0.154829171320279	5.59037937835251	2.26574032725501e-08	1.00087626558844e-05
ContigAmph9184	150.934697897685	4.44541244818714	0.795423862101662	5.58873408253244	2.28730897525825e-08	1.00184133116311e-05
ContigAmph10253	245.10064904923	1.43734609473516	0.259581555831623	5.53716572862939	3.07405641942297e-08	1.32164402954552e-05
ContigAmph22050	138.675984718047	1.93753197971016	0.349847670185144	5.53821604324188	3.05568180003956e-08	1.32164402954552e-05
ContigAmph38585	128.116520066512	1.81625459470307	0.328079299527253	5.53602314233237	3.09416700671403e-08	1.32164402954552e-05
ContigAmph15239	116.303915191446	2.14864964962293	0.389623186636352	5.51468630030054	3.49402614096184e-08	1.48020694319239e-05
ContigAmph8051	692.723581310612	1.06406212829358	0.193177060355524	5.50822197177695	3.62476165892333e-08	1.52310716731539e-05
ContigAmph72740	49.0848343671094	2.11486891215866	0.3843792685263	5.5020368821321	3.75428389846933e-08	1.56480975006846e-05
ContigAmph54701	3198.32274519436	0.859015042542037	0.156604301066874	5.48525830191099	4.12865696361832e-08	1.7070840520612e-05
ContigAmph2668	218.384337983901	1.460202278535	0.266343447501713	5.48240361169619	4.1958561817495e-08	1.70754827478379e-05
ContigAmph21030	488.523180266741	1.89981902654033	0.346487325962323	5.48308374992891	4.1797501861745e-08	1.70754827478379e-05
ContigAmph11320	164.754067534194	-1.85423336218346	0.339580445030719	-5.46036554612479	4.75155223575586e-08	1.90371492831633e-05
ContigAmph59023	61.3560104056381	2.03932735947486	0.37347222822385	5.46045249247432	4.74922567280797e-08	1.90371492831633e-05
ContigAmph22390	121.857611131107	1.41155500368847	0.26004892156994	5.42803636779869	5.69774316253804e-08	2.26524736625089e-05
ContigAmph33062	486.261597646974	1.0610766574387	0.195542169483576	5.42633162064727	5.75240394987838e-08	2.26952095988942e-05
ContigAmph52340	93.0214957385951	1.50702813365787	0.278451271469893	5.41217903478247	6.22623903073304e-08	2.43785559139702e-05
ContigAmph27141	219.612576682479	1.82961357190867	0.33914813274385	5.39473284758	6.86255804524034e-08	2.66680037601655e-05
ContigAmph31041	27.0042688567769	2.85546652586851	0.530538058653556	5.38220864515423	7.35774089524098e-08	2.83789164499727e-05
ContigAmph27357	64.2469895197106	1.70923062639363	0.318005784078502	5.37484131411802	7.66501573049419e-08	2.93450868899898e-05
ContigAmph10814	945.229446867132	1.14525879417898	0.214040169157002	5.35067225320176	8.76280984965934e-08	3.33012547257201e-05
ContigAmph21431	60.0767389527069	1.82533647915055	0.341538068708363	5.34445980225176	9.06870978948246e-08	3.42122041430373e-05
ContigAmph81438	372.250516898385	1.4949965639682	0.280660055778019	5.32671654975592	1.00004037495117e-07	3.74536860427363e-05
ContigAmph4071	32.8950255124735	-2.39679805488438	0.451214343931672	-5.31188355848752	1.08497924429543e-07	4.03424944332122e-05
ContigAmph5956	833.317860750998	0.977137197193266	0.185083857771057	5.2794295999706	1.29586655563593e-07	4.78396907582053e-05
ContigAmph8995	86.466057782093	2.05959761446332	0.391257134483746	5.26405126690127	1.40915127106261e-07	5.16528895699291e-05
ContigAmph65978	66.3085523302204	2.07380265046036	0.394105446023318	5.26205022383187	1.42457837190968e-07	5.18506398406902e-05
ContigAmph18989	153.340157456992	1.35205424286125	0.257896735134343	5.24261868672722	1.58313491932697e-07	5.72187029164303e-05
ContigAmph42686	42.3471819632459	2.41934032874013	0.463888740148975	5.21534609346881	1.83474343954135e-07	6.58519999508715e-05
ContigAmph54740	182.11440099587	2.08772916743512	0.400637580929935	5.21101680623473	1.87808436044013e-07	6.69426979896466e-05
ContigAmph22557	2391.18291050814	1.08870602881783	0.209156412937336	5.20522423160897	1.93762493543071e-07	6.85919227142472e-05
ContigAmph43347	27.434714031152	3.4096006146758	0.657275706186841	5.1874739665284	2.13165712957621e-07	7.49473245476304e-05
ContigAmph92347	26.9652212847081	2.88389402845707	0.556507969575091	5.18212529940767	2.19371758059142e-07	7.66081752941128e-05
ContigAmph3603	130.247336112858	1.35134496362051	0.261983099192002	5.15813794015061	2.49417846920054e-07	8.65161879209131e-05
ContigAmph7425	118.043950721614	-1.59605580242552	0.309538823812266	-5.15623785982182	2.51960799150407e-07	8.68156129552642e-05
ContigAmph90544	73.1868678789195	2.03325821650951	0.395373553173413	5.14262575275922	2.70924977551963e-07	9.27316989390441e-05
ContigAmph5294	1162.35859769109	1.61736377516855	0.315155962027385	5.13194725799925	2.86759862411379e-07	9.75058995320377e-05
ContigAmph34655	160.842171866052	1.81579653976548	0.355649557605814	5.10557795147893	3.29785003893236e-07	0.00011140266758966
ContigAmph15121	292.706347109005	1.31929476528849	0.258974709649656	5.09429962127674	3.50032824074537e-07	0.00011747465246408
ContigAmph13585	407.624717022192	1.06614557498062	0.209992516232911	5.07706462166543	3.83310533281645e-07	0.000127813042594378
ContigAmph15312	40.2362778898284	2.88046050429364	0.568170498185963	5.06971149239583	3.98419187753804e-07	0.000131999341665818
ContigAmph4820	159.958484863891	1.7371450578219	0.346253497638919	5.0169747588613	5.24914609048323e-07	0.000172800551936647
ContigAmph12717	121.828816752325	1.34866810328695	0.268959813149788	5.01438518822832	5.32033096311054e-07	0.000174035433859117
ContigAmph20716	122.277921923071	1.50081515110867	0.300318632156599	4.99740938592874	5.81056273116392e-07	0.000188876178740551
ContigAmph7428	114.79919907938	1.29115945307085	0.259174413953375	4.98181681353441	6.29900514972875e-07	0.000203473613849113
ContigAmph23661	357.584852520028	1.23797889338117	0.248709923471953	4.97760152107794	6.43770180265335e-07	0.000206662223582817
ContigAmph23450	133.604624654728	-1.75052283272849	0.351811042906229	-4.97574725985809	6.49964080461225e-07	0.000207362614410852
ContigAmph81467	140.81484226001	1.93442582123413	0.390941446802839	4.94812161016458	7.49330894048391e-07	0.000237597655999982
ContigAmph35678	85.3051359020892	2.19531786229744	0.44542608228957	4.92857950978783	8.28296257585826e-07	0.000261034535226011
ContigAmph13860	785.01324327103	1.02794689932546	0.208876876827343	4.92130538783936	8.59688616746547e-07	0.000269285736169264
ContigAmph14224	108.104975993115	1.36475779353459	0.277646676197934	4.91544797950923	8.85796700715264e-07	0.000275792269155227
ContigAmph11158	86.2631241999579	2.12939578975057	0.433479116261801	4.9123376648773	8.99968883579856e-07	0.000278526896879888
ContigAmph3314	616.976920138064	1.51182258653309	0.308016652256012	4.90824952306969	9.18928935791712e-07	0.000282701923318208
ContigAmph7720	2232.13994677	0.818667764381812	0.166927409950326	4.90433395345575	9.37448828716098e-07	0.000286692930552443
ContigAmph22906	59.8253649893846	1.7613896763121	0.35990493039048	4.89404153035935	9.878597815383e-07	0.000300332617347209
ContigAmph28023	114.907222072477	2.02458738852816	0.414479608718205	4.88464895725337	1.03613286981155e-06	0.000313166615458129
ContigAmph8103	2090.10054520453	1.03952172707679	0.213399003226716	4.87125858770954	1.10889595447884e-06	0.000333210340181887
ContigAmph10362	724.152204511092	1.01087120666301	0.207695992504769	4.86707131164219	1.13264168058603e-06	0.000338378338840511
ContigAmph29983	31.5414183983859	2.26982123404685	0.46738286916766	4.85644935615434	1.19509328820618e-06	0.000354983916710623
ContigAmph88888	105.953863517196	1.67942974403997	0.346040542106306	4.85327451464933	1.21439404273136e-06	0.000358655666883013
ContigAmph34230	231.511228999318	1.16259745582863	0.240648870721453	4.83109458333723	1.35784476024804e-06	0.000398743457890113
ContigAmph18342	45.8971113680494	1.95257422430388	0.405452072736549	4.81579539383094	1.46614695488144e-06	0.000428114910825382
ContigAmph18921	171.052267127443	1.37791779365249	0.286390493122295	4.81132518970904	1.49932838533523e-06	0.000435344316110482
ContigAmph31765	457.698967579839	1.75867695673718	0.365617032376107	4.81016145584828	1.50808429162494e-06	0.000435440382839908
ContigAmph7046	168.07489673168	1.33085680863573	0.277112751348719	4.8025823501748	1.56632367845033e-06	0.000449743738872371
ContigAmph95933	417.394305834444	0.987959504391728	0.206001257256967	4.79589065400384	1.61953611782498e-06	0.000462453617202577
ContigAmph5577	5194.85183673153	0.76061053799683	0.158836049958735	4.78865180917325	1.67905520331526e-06	0.000476814775429373
ContigAmph31306	194.737091473025	1.01893655424782	0.213053439675109	4.78253979753449	1.73094102956512e-06	0.000488863148481112
ContigAmph62142	115.351227743434	4.26004747142902	0.891101976406703	4.78065090665303	1.74728542777746e-06	0.000490797282876359
ContigAmph23245	850.037267221763	1.08206085011705	0.226485932911591	4.77760731629823	1.77393379707868e-06	0.000495589158747106
ContigAmph1557	97.1695543912236	1.61337086418148	0.338057231189024	4.7724784898311	1.81972548604352e-06	0.000505648881831576
ContigAmph16460	277.853875168943	1.67151381046263	0.351281204387611	4.75833545770428	1.95195913025691e-06	0.000539492276407477
ContigAmph79425	39.3297252891779	2.30948279112408	0.489176052252027	4.72116895439153	2.34493047342001e-06	0.000644656311639574
ContigAmph23610	198.202298526308	1.73003900233979	0.368160802476501	4.69913958982697	2.61259842455571e-06	0.00071444199457533
ContigAmph14703	201.043689409101	1.89299860553848	0.403253899843015	4.69430948163282	2.67508788202833e-06	0.000727680221551328
ContigAmph29531	231.182927436234	1.15900050125571	0.247321711611495	4.6862060500225	2.78316070972796e-06	0.000751016098871789
ContigAmph81466	101.429745261824	1.44998524817263	0.309448480616377	4.68570808712476	2.78993674993003e-06	0.000751016098871789
ContigAmph83009	213.640210019378	1.25298974049034	0.267645743902944	4.68152312911318	2.84751262082656e-06	0.000762543224325389
ContigAmph25040	68.4436927298279	1.47744231949752	0.316259478268071	4.67161435789506	2.98841641177015e-06	0.00079053420422599
ContigAmph26289	327.405859291427	1.2303818741063	0.263368484620762	4.67171262301177	2.98698678537324e-06	0.00079053420422599
ContigAmph65073	17.0409413942989	3.60766467845053	0.772360100142334	4.6709620004784	2.99792400023787e-06	0.00079053420422599
ContigAmph22952	126.598296231717	-1.32345647260857	0.284031652543435	-4.65953868435906	3.16918834935673e-06	0.000831453455066768
ContigAmph6905	75.8048382355253	-1.56123840685192	0.335498762658426	-4.65348484292751	3.2637160485262e-06	0.000851928789151657
ContigAmph26171	145.173584965206	-1.27907685890161	0.27495003830192	-4.65203375420907	3.28677261449866e-06	0.000853635958832908
ContigAmph2080	168.953737230168	-1.12443352081537	0.242109017627719	-4.64432730277055	3.41186304363697e-06	0.000879715807537723
ContigAmph56835	87.350604150236	2.14631349516631	0.462192912701006	4.64376115726976	3.42123050296189e-06	0.000879715807537723
ContigAmph8913	148.547761214546	1.3101253221623	0.282700805936463	4.63431760593124	3.58116820454889e-06	0.000916282660811409
ContigAmph23178	413.561196356519	-1.17365141226072	0.253505200000585	-4.62969364043818	3.66207129714399e-06	0.000932366960204876
ContigAmph33669	333.711753205901	1.8536217071924	0.400962895895648	4.62292577733879	3.78365133293741e-06	0.000953923099958717
ContigAmph87521	31.2089174954918	2.99005560363622	0.646738920000282	4.62328075699375	3.77717934962238e-06	0.000953923099958717
ContigAmph40817	20.913129315305	4.14552934515911	0.897579323994843	4.61856599671733	3.86401087062258e-06	0.00096477071418965
ContigAmph84705	48.6790405561853	2.78836935087319	0.603695065214084	4.61883740905581	3.85896080878984e-06	0.00096477071418965
ContigAmph5862	161.998654008946	-1.14758190939497	0.248794358741149	-4.61257206635033	3.97716583076465e-06	0.000988249224986732
ContigAmph35515	92.5819300285551	1.50313582152735	0.326066234503923	4.60990946767062	4.02844358812837e-06	0.000996201332099649
ContigAmph49184	90.952854835488	-1.81591029773034	0.394498050008254	-4.60309068116393	4.1626687139926e-06	0.00102449223720949
ContigAmph33841	145.55691708699	1.3103417665766	0.284827844616814	4.6004693408379	4.21540064159485e-06	0.00103255339696772
ContigAmph10190	211.529189232242	1.04395343306526	0.227848110093554	4.58179544538078	4.61000718551834e-06	0.00112388495932231
ContigAmph81000	143.116582506507	1.39569830132954	0.305302699623638	4.57152296081916	4.84192222370636e-06	0.0011748821981692
ContigAmph72155	32.916349664765	2.99303971852024	0.6551274246089	4.56863749873856	4.9090497712464e-06	0.00118560433821074
ContigAmph49092	23.6416081108521	-2.34267091799184	0.51418930568667	-4.55604753362837	5.21251454209646e-06	0.00125304000741262
ContigAmph84514	105.693402960885	-1.54092311228519	0.340819971073367	-4.52122305929509	6.14833586439524e-06	0.0014711601426639
ContigAmph31042	99.8053726747221	2.17245718178379	0.48384730362628	4.48996442783068	7.12350688810904e-06	0.00169664207375589
ContigAmph9535	209.680351791481	0.986168862366962	0.220152113798417	4.47948850161826	7.48221204171383e-06	0.00177390205121072
ContigAmph68395	22.8288197290854	2.83163166111691	0.633321823672538	4.47107861323444	7.78260816704594e-06	0.00183669552742284
ContigAmph7169	208.316934455763	0.992999010127068	0.222390144272987	4.46512147997058	8.00233335110291e-06	0.0018799663496291
ContigAmph64330	27.5244913795651	2.42067391330648	0.542307465009632	4.46365589539412	8.05729259625885e-06	0.00188431271739838
ContigAmph89683	292.377310038808	1.68273823557982	0.37739917884328	4.45877556156155	8.2429176319605e-06	0.00191904033734345
ContigAmph14720	116.36045313562	1.35266076321525	0.303495324522571	4.45694102649893	8.31374621571127e-06	0.00192685049064045
ContigAmph8138	823.866461725473	0.899168993849507	0.202283943297055	4.44508337732507	8.78577867724492e-06	0.00202284813109308
ContigAmph16419	430.372656570264	1.47269756339393	0.331389729912604	4.44400483920342	8.829961694148e-06	0.00202284813109308
ContigAmph92485	115.201756413354	1.54889505379864	0.348565251930022	4.44363012440952	8.84536176818815e-06	0.00202284813109308
ContigAmph50072	118.973423741275	1.26780717562124	0.285931376398168	4.43395611769372	9.25194656823197e-06	0.00210650927943833
ContigAmph88949	40.5032807278196	1.85954127692636	0.41951022411489	4.43264828848866	9.30826404956065e-06	0.00211003648744514
ContigAmph87924	15.4949565168627	5.30386996127979	1.1996585428307	4.42114966210707	9.81771418183769e-06	0.00221580235709214
ContigAmph66788	17.2821060703085	2.73481734028788	0.619929925499102	4.41149431217745	1.02659651588758e-05	0.00230689627509277
ContigAmph6662	29.1366251500942	2.12112207547286	0.481109989604953	4.40880904845594	1.03940617721048e-05	0.00231658136556715
ContigAmph7992	268.235401417926	0.994129124150055	0.225491951743372	4.40871222437887	1.0398709016554e-05	0.00231658136556715
ContigAmph34117	82.2327916791851	1.85104863578771	0.420259841046379	4.40453370747702	1.06011657087739e-05	0.0023515478476063
ContigAmph30466	23.4752055778378	2.93682030338732	0.668584409903301	4.39259465205311	1.12005840440927e-05	0.00247389310143113
ContigAmph41154	26.3279451385451	2.36222913431247	0.538722245878535	4.38487393528776	1.16052967368868e-05	0.00255237513425215
ContigAmph62846	86.9005876789895	1.87051771644943	0.427691772644356	4.37351811769559	1.22260093091876e-05	0.00267749603871208
ContigAmph13529	919.322113596173	0.835934066439901	0.191354736046027	4.36850471387774	1.25100117570399e-05	0.00272813269050993
ContigAmph4913	104.749412872294	1.15778274293528	0.266298238033774	4.34769208945514	1.3757756296134e-05	0.00298762973281256
ContigAmph71530	59.4490760710397	1.41081164860411	0.325089698958933	4.33976115860357	1.42637660540835e-05	0.00308455432945293
ContigAmph1916	126.873288269424	1.40737977864848	0.324625108902795	4.33540025109364	1.4549514057688e-05	0.00313323785232312
ContigAmph6635	489.222447686076	0.988210542025003	0.228239504987673	4.32970857555258	1.49306796843263e-05	0.00320198028549676
ContigAmph10013	78.5154813499756	1.23467572991011	0.285778434289035	4.32039503954088	1.55750125446739e-05	0.00332635929073937
ContigAmph26768	57.5006305460105	2.00939511149461	0.466420110871126	4.3081227945804	1.64645974291941e-05	0.00350187758654513
ContigAmph85336	84.594520660067	-1.24920296572377	0.29048155041539	-4.3004554469549	1.70447438164928e-05	0.00361041204676891
ContigAmph21788	13.0968589910461	3.43159823996703	0.798482431672086	4.29765027238106	1.72618231688518e-05	0.00364146966799565
ContigAmph19675	329.686603286524	1.22704580140035	0.286405419247892	4.28429673091591	1.83318119101178e-05	0.00383587597879566
ContigAmph42687	14.8036556686272	3.01576498391819	0.703784822677521	4.28506680841004	1.82684282200991e-05	0.00383587597879566
ContigAmph61389	118.649373615357	4.45293658292451	1.04021218495171	4.28079640610175	1.8622566992119e-05	0.00388100303395434
ContigAmph26509	116.127567102458	1.56603213407523	0.368105090774607	4.25430718923181	2.09697259547907e-05	0.00435260769577271
ContigAmph96336	38.3197860965494	1.72004948263217	0.404460910889443	4.25269645674694	2.11211783282662e-05	0.00436650792287244
ContigAmph6593	150.201728831144	1.14525766077371	0.270071369949307	4.2405741156076	2.22948801682588e-05	0.00459079118173821
ContigAmph26788	96.0316765337488	1.2707471295152	0.30047896673637	4.22907181596542	2.34657436341481e-05	0.00481271227772743
ContigAmph28408	90.5889326402954	1.3358429938068	0.316799689082654	4.21668025519517	2.47925121119361e-05	0.00506472804740437
ContigAmph37223	30.1607810550751	2.61533870812279	0.620744604907231	4.21322825433762	2.51746424947019e-05	0.00512254418384319
ContigAmph51641	223.987371471755	2.91763488012677	0.694184312877779	4.20296861510967	2.63437126127438e-05	0.00533940565755707
ContigAmph25014	98.4356329111534	1.11615311558432	0.265632406622395	4.20187103590476	2.64717933568688e-05	0.00534440690568909
ContigAmph5723	1040.77518152797	0.719424833789918	0.172109697194822	4.18003660174681	2.91462179361305e-05	0.00586145185918664
ContigAmph28656	37.6656630255523	1.66200287002882	0.398732313563243	4.16821715595721	3.06991395110847e-05	0.00614982297089497
ContigAmph11774	1139.80613698424	1.28458056530771	0.308391884372443	4.16541624602653	3.10785004827428e-05	0.00620178076814702
ContigAmph92141	95.5265337243432	1.49023969149126	0.358794128023993	4.15346733710091	3.27474975051646e-05	0.00650969869637279
ContigAmph40959	24.563520237046	2.08133156355798	0.501965315882778	4.14636529198767	3.37794762760778e-05	0.00668911284234792
ContigAmph85112	214.303823490086	-0.878665536782384	0.212834519296763	-4.12839768513879	3.65299920521837e-05	0.00720616835582085
ContigAmph15336	93.4109877660493	1.73711781915798	0.421511683975378	4.12116172622975	3.76966671900267e-05	0.0074080401028492
ContigAmph8704	139.223127775044	1.09893895649067	0.266958879487576	4.11651022284805	3.84652276099838e-05	0.00753044251437274
ContigAmph91715	43.2232064301224	-1.70049623816515	0.414724830172212	-4.10030004101521	4.12614824424708e-05	0.00804739040964777
ContigAmph31043	49.7257515975039	1.93291232234591	0.472603137663792	4.08992697742303	4.31509020718048e-05	0.00838425271683895
ContigAmph68528	11.3374341897305	4.88028381295795	1.19387626629067	4.08776349003136	4.35551854451014e-05	0.00843110938031694
ContigAmph74326	41.8818491579173	-1.81162272252076	0.443408281836241	-4.08567633202175	4.39486085266722e-05	0.00847552195183779
ContigAmph31892	80.7339186305564	1.24721516210289	0.305350333850382	4.08453839357519	4.41645240453755e-05	0.00848549911063638
ContigAmph42410	19.8280824844062	2.62356113702559	0.642921823250292	4.08068452827154	4.49032650191301e-05	0.00859548277499525
ContigAmph14693	127.004467419843	1.55336072451368	0.381001058312483	4.07705094414638	4.56105023709131e-05	0.00869864651121135
ContigAmph11521	13.2149954202997	3.42825045903701	0.841325323550093	4.07482143122831	4.60496684594014e-05	0.00875011420829302
ContigAmph73338	105.195720088599	1.09298939210404	0.268363730854999	4.07279101621448	4.64531027083149e-05	0.00879444014789944
ContigAmph53524	45.8681308725276	1.65976889985496	0.408991953558817	4.05819450826011	4.94535710507452e-05	0.009328315205061
ContigAmph10961	162.405965227075	-1.3265638396403	0.327083956111522	-4.05572885754138	4.99782097474214e-05	0.00939299560940264
ContigAmph11025	70.7341647879029	-1.49724611502888	0.369534729452663	-4.05170609335294	5.08455108432378e-05	0.0095213745739924
ContigAmph14	2288.76293691859	-0.682422885931957	0.168956533968273	-4.03904406597323	5.36694826702545e-05	0.0100139117051604
ContigAmph94172	171.505765615321	1.21359225863755	0.300548893711134	4.03791956660457	5.39273358243364e-05	0.0100258288659892
ContigAmph3688	72.9840070716735	1.36646086408306	0.338658023083791	4.03492836708897	5.46189582431531e-05	0.0101180151893875
ContigAmph91145	48.0406213522804	1.48955811294334	0.369651686002224	4.02962618418676	5.5865621254835e-05	0.0103119956033389
ContigAmph13103	206.475430080616	0.882856493244221	0.219181564034881	4.02796876248095	5.62608163733105e-05	0.0103479858841216
ContigAmph22896	178.917267578486	0.874277104027502	0.217741479912873	4.01520695265475	5.9393655128441e-05	0.010847002373351
ContigAmph60476	29.5746208754983	-1.70725908787815	0.425163030336212	-4.01553984251188	5.93098776756877e-05	0.010847002373351
ContigAmph27764	126.482029037265	1.0289487985019	0.256764950221085	4.00735691384642	6.14020378336906e-05	0.0111743060682974
ContigAmph2104	129.188948047983	0.939816492825782	0.234634903716448	4.00544197789742	6.19016276628836e-05	0.0112256972776438
ContigAmph40300	33.0310366249567	2.13125343427119	0.532957974524195	3.9989146164365	6.36336294161359e-05	0.0114994423172852
ContigAmph81494	114.238645800711	1.07944635297252	0.270557339360304	3.98971380900153	6.61530650066411e-05	0.0119130836648197
ContigAmph67325	26.7421802833198	2.24336819177438	0.562935691166766	3.98512339326837	6.74450684252137e-05	0.0121035795711415
ContigAmph24455	140.705573788578	1.00532952156711	0.252803183756424	3.97672808794903	6.98699806127234e-05	0.0124342959598601
ContigAmph50576	64.3880054039078	1.54022616459821	0.387356189171899	3.97625288469237	7.00096765791986e-05	0.0124342959598601
ContigAmph91812	22.9904129701837	2.23669910701321	0.56240927784626	3.97699539306787	6.97915165992941e-05	0.0124342959598601
ContigAmph3188	40.4235212751331	2.2419923542635	0.564098545001828	3.97446930882658	7.05363567644216e-05	0.0124849351473026
ContigAmph13803	1520.74062280497	-0.708677857060409	0.178868482027609	-3.96200520643442	7.43229192790857e-05	0.0131102585666221
ContigAmph24856	95.9313967094515	1.05864098860505	0.267670973279901	3.95500855260102	7.65319139270872e-05	0.013453998093223
ContigAmph71894	38.6405541375839	1.89363245170802	0.479137920898309	3.95216568990772	7.74470841688936e-05	0.0135687291463902
ContigAmph90129	688.555686272623	1.02358781353353	0.25909249910831	3.95066556174454	7.79341641774247e-05	0.0136079369640068
ContigAmph3408	109.825801420094	1.08534122944061	0.274784477051137	3.9497909091809	7.82194922280425e-05	0.0136117718394416
ContigAmph37742	23.5258001617001	2.21028675455092	0.559945846018283	3.9473223531669	7.90301180307312e-05	0.0137066866453031
ContigAmph63070	70.8531614054826	1.27218561085477	0.322798948868324	3.94110828215155	8.1106000501695e-05	0.0140196740131425
ContigAmph70299	22.9333500405717	2.43013033452228	0.616761969707433	3.94014296256793	8.14330653826352e-05	0.0140292885041204
ContigAmph96302	31.771727778097	2.1648457147377	0.549623895809532	3.93877655473682	8.18981568150301e-05	0.01406253932501
ContigAmph88078	67.434872800541	1.28778767530881	0.32777743585276	3.92884785360054	8.53538180333606e-05	0.0146073732822391
ContigAmph14789	115.045300920034	1.12170867988243	0.285581011837736	3.92781254140163	8.57219839887549e-05	0.0146168721581665
ContigAmph51323	28.9610584507166	1.72037176572846	0.4380764886678	3.92710362284026	8.59749465227658e-05	0.0146168721581665
ContigAmph22590	327.569179994803	0.842590005266772	0.214807898891138	3.92252803372833	8.76246941229786e-05	0.0147999826504968
ContigAmph29311	72.4416140740282	-1.42898967604039	0.364235146192421	-3.92326136282705	8.73582918640608e-05	0.0147999826504968
ContigAmph18994	49.9152336997668	-1.4159937457524	0.361094540589369	-3.92139339310212	8.80383970008677e-05	0.0148214218586086
ContigAmph96303	82.5112134779501	1.843615690206	0.470272963171822	3.9203097659952	8.84352219307085e-05	0.0148398896437232
ContigAmph52222	74.3658400597654	1.41395686983523	0.361385114006731	3.91260407535462	9.13061665037117e-05	0.0152720644322907
ContigAmph24421	107.018869098621	-1.14181301947999	0.292235120829246	-3.90717247208339	9.33824981075093e-05	0.0155689710715758
ContigAmph25826	104.251707200639	1.14640265950619	0.293542282219377	3.90540896132107	9.40661672185865e-05	0.0156325266447763
ContigAmph13613	1205.68758935019	0.902684360822842	0.231325135107974	3.90223207003209	9.53097116838861e-05	0.0157884203162499
ContigAmph24014	53.5053636607632	-1.64709414649897	0.422447935368902	-3.89892814853184	9.66194376031865e-05	0.0159542460481888
ContigAmph69487	63.388236425773	1.4048232747906	0.361211536926847	3.88919824306471	0.000100575937975537	0.0165546712685594
ContigAmph61510	77.3173665611391	1.13722862469169	0.29304750953359	3.88069711461356	0.000104157489317607	0.0170897640567975
ContigAmph22742	199.928656002932	-0.911187140308674	0.235147991156044	-3.87495183704977	0.000106645790257369	0.0174426614672844
ContigAmph95484	134.354522684963	1.08437892376204	0.27996814932522	3.87322245896762	0.000107405705716873	0.0175115346822424
ContigAmph80129	39.7690173396552	2.13863934558363	0.555405397051805	3.850591580377	0.000117832857989224	0.0191511743154562
ContigAmph18384	411.619202549534	1.13486156284657	0.295178733152539	3.84465896552281	0.000120720207967283	0.0195589442902228
ContigAmph28727	77.232714343319	1.10250808897896	0.28684196889908	3.84360800900393	0.000121238603965367	0.0195815500229564
ContigAmph37355	115.572008454282	0.964293722068953	0.251088209632519	3.84045799474315	0.00012280498486998	0.0197727502742057
ContigAmph25188	249.240245405336	-1.37196848565984	0.357443556692666	-3.83828008638432	0.000123899109123696	0.0198869613538793
ContigAmph70652	20.9805711919246	2.26272456660053	0.589938913186485	3.8355235025584	0.000125297123251533	0.0200490913874063
ContigAmph54261	36.6547487026584	-1.56719932384456	0.408918001906403	-3.83255155443922	0.0001268210109309	0.020230299780718
ContigAmph26884	37.4992458149186	1.49801218504131	0.391599757401117	3.82536545727961	0.000130578233136694	0.0207157961944274
ContigAmph27342	78.2475239879363	1.12607625222115	0.294383655188251	3.82519964126761	0.000130666155084423	0.0207157961944274
ContigAmph4249	261.158798220669	1.06236622039778	0.278395601763737	3.81603090590264	0.000135615525526647	0.0213693683576805
ContigAmph80514	18.6063143394096	2.38404848663073	0.624739275011791	3.81606949008566	0.000135594332190566	0.0213693683576805
ContigAmph9136	490.989144618592	-1.17018454561832	0.307423317801381	-3.80642741737096	0.000140988643998722	0.0221485017520666
ContigAmph17294	12999.8509076151	1.33787390164844	0.351912826068714	3.80171963776963	0.000143695275949494	0.0225052928550716
ContigAmph64903	49.6767382007999	1.38294276076569	0.364855506102631	3.79038478968899	0.000150414088189573	0.023486410072477
ContigAmph33063	88.268023561754	1.04864386140908	0.276891440758284	3.78720215596879	0.000152353142995288	0.0237175296462906
ContigAmph83810	36.1312154479744	1.45779323829248	0.385853453096409	3.77810079602486	0.000158028920796536	0.0245272274547993
ContigAmph26935	141.060408435248	1.20274061382881	0.318886523722234	3.77168843571595	0.000162146639808879	0.0249416277734587
ContigAmph62655	37.161026943486	2.11806047402549	0.561353976322486	3.77312812122794	0.000161213445974159	0.0249416277734587
ContigAmph84399	19.9771296931965	2.41864402645737	0.641242412567176	3.77180919268031	0.000162068171146293	0.0249416277734587
ContigAmph28186	53.0932034731033	4.85722943749575	1.29086144434701	3.76278140366397	0.000168034067319186	0.0257705422413198
ContigAmph27698	109.68221756308	0.991462605801615	0.264308146380515	3.75116173821689	0.000176017104771957	0.0269149942101593
ContigAmph80603	17.8694260793883	2.22913479496305	0.595362100510468	3.74416643762136	0.000180993650622437	0.0275943240081711
ContigAmph61026	30.8947469237121	1.69282646079506	0.452502170652912	3.74103500620228	0.000183263990125881	0.0278582825460766
ContigAmph928	1521.90942808038	0.862598227272914	0.231123375579886	3.73219811760132	0.000189816114201076	0.0287696658251274
ContigAmph3917	32.2809834428341	1.71000922123413	0.458588518878817	3.72885310215541	0.000192353236781501	0.0290689610813307
ContigAmph22895	76.6072432281884	1.16971126706674	0.313796400227973	3.72761212753537	0.000193302568110596	0.0291272592718019
ContigAmph28525	88.8489228884787	1.09112461822074	0.2938983339254	3.71259205061604	0.000205147411341005	0.0308222058364782
ContigAmph13385	40.4519139732701	1.38253837669993	0.372652347144065	3.70999508602437	0.000207263270261423	0.0310087750133508
ContigAmph90164	36.8100267360662	-1.46446725128481	0.39477795306131	-3.70959735701699	0.00020758912148091	0.0310087750133508
ContigAmph25557	61.4906663006021	1.23660275974171	0.334118985822977	3.70108497933991	0.000214679559185457	0.0319754995300897
ContigAmph26599	3071.52677032393	0.912038703152619	0.246533879671635	3.69944570850623	0.000216070854325922	0.0320902472269568
ContigAmph64053	14.615714588117	2.45426599784667	0.665652292906041	3.68700900455412	0.00022690533092526	0.0336027940502611
ContigAmph30156	64.3702266281078	1.19749123705246	0.325321480836101	3.68094733238892	0.000232369004051995	0.034313598872638
ContigAmph6884	189.400912002191	0.955902336422563	0.26006832169931	3.67558159400811	0.000237308178603645	0.034943122230629
ContigAmph42505	107.308824009672	1.26310903107245	0.344051078283659	3.67128345411275	0.000241335504618609	0.0354351824451937
ContigAmph6592	97.9988141485292	1.16288123635468	0.317054724243256	3.66776189545902	0.00024468287717999	0.0358249003517581
ContigAmph23052	582.847584383485	0.785645943672132	0.214646719841001	3.66018145655381	0.000252036701945819	0.0367973584840896
ContigAmph66944	59.042146975421	1.25170126340528	0.342114460758383	3.65872071186517	0.000253477389223032	0.0369034517876146
ContigAmph42992	28.1217719173472	-1.64438701180607	0.450540190899837	-3.64981203679485	0.000262432271947352	0.0380998582677723
ContigAmph32627	66.9178834720668	1.14300410572972	0.313705652006104	3.64355598447261	0.000268897131009176	0.0389290737229083
ContigAmph56536	352.682572362221	0.781258224136118	0.214773184804056	3.63759668065119	0.000275193906702023	0.0397293907094618
ContigAmph3958	256.454744706218	0.749492094368534	0.206234299492173	3.63417771056545	0.000278868606308564	0.0401477577951304
ContigAmph12556	101.201394437492	-0.924942891001635	0.254569898065483	-3.63335531038989	0.000279759354569476	0.0401641180043578
ContigAmph18403	326.175407900009	1.21050550186818	0.333554865290929	3.62910461765374	0.000284405972094817	0.0406056305573163
ContigAmph26040	251.965710242158	0.778957885924897	0.214627120351656	3.6293544107968	0.000284130924632749	0.0406056305573163
ContigAmph3787	258.959464926311	0.717765477022816	0.198082312841623	3.62357177037158	0.000290562528756708	0.0412137331853087
ContigAmph6501	162.08324570568	0.919760988993801	0.253907578508857	3.62242432618732	0.000291854855387025	0.0412137331853087
ContigAmph22401	91.618545044765	0.938910455585719	0.259151828986314	3.62301303933805	0.000291191137076334	0.0412137331853087
ContigAmph38630	13.7657284848781	3.17140703136158	0.875030506862914	3.62433881617618	0.000289701623242581	0.0412137331853087
ContigAmph59112	28.0688495371684	2.06950524724297	0.574321458454442	3.60339182313025	0.000314091501700359	0.0442329841250172
ContigAmph12212	393.980949581116	0.905888884455252	0.252127981848939	3.59297241746857	0.000326927205899769	0.0455699243816628
ContigAmph27313	267.96329787717	0.85088762918006	0.236762290350468	3.59384776993216	0.000325830251516	0.0455699243816628
ContigAmph30289	64.5132549368811	1.69314126173054	0.471256197870602	3.5928254511688	0.000327111716306728	0.0455699243816628
ContigAmph81327	40.6303747901198	1.64787988586604	0.458561939597942	3.59358189934137	0.000326163064424151	0.0455699243816628
ContigAmph57800	28.5999335724797	1.82278360086769	0.507737576500463	3.59001122869627	0.000330663717003292	0.0459409235204251
ContigAmph53958	73.2198280490416	1.07873538684265	0.301137548758271	3.58220152648107	0.000340710790775693	0.0470836805092271
ContigAmph74816	36.7821216025336	1.39968127046225	0.390725219999447	3.58226497502319	0.000340628026574607	0.0470836805092271
ContigAmph35170	91.3846904506832	-1.31761962147694	0.367958628442639	-3.58089067527423	0.000342424920048799	0.0471943721808057
ContigAmph28371	97.2384120206004	1.43094122309575	0.40043844686938	3.57343615300384	0.000352327180481437	0.0484299946702197
ContigAmph19045	54.2614342758961	1.30998305169343	0.36694896558339	3.56993253710573	0.000357073174787383	0.0489521749753611
ContigAmph71022	19.2450377933019	1.92272096183136	0.538702176577811	3.56917243966925	0.00035811066348302	0.0489645278609958
ContigAmph29530	119.13263164258	0.903545888617715	0.253336120938983	3.56658926200002	0.000361657657895605	0.0493190353316002
ContigAmph39728	22.4674957777062	1.71629079129395	0.482146882799129	3.55968451217591	0.00037130058281018	0.050500787689372
ContigAmph16993	96.7741497422711	1.08909723874297	0.306188665378439	3.55694825409974	0.000375188023980945	0.0508955848593993
ContigAmph6795	99.750578256601	1.32497248388499	0.374143492338244	3.54134846928502	0.000398087443929011	0.0538606058953586
ContigAmph50008	41.0469237817474	1.51038612577115	0.426690045174126	3.53977352613133	0.000400470534508398	0.054041564244209
ContigAmph15490	99.4821370416937	0.967259547746795	0.273574275226025	3.53563779689319	0.000406792025708455	0.0547516642101973
ContigAmph8446	530.556851309507	-0.825509861861711	0.233724384631714	-3.5319800420589	0.000412460483671869	0.0553704094496022
ContigAmph489	3088.75395933635	-0.585020200030524	0.165837286302347	-3.52767591097663	0.000419225098191536	0.0560870969087888
ContigAmph6200	422.510628358833	-0.710954899658695	0.201571123523428	-3.52706720700529	0.000420190091440262	0.0560870969087888
ContigAmph90352	85.8700521978651	1.19174459936251	0.337937575494155	3.52652290181066	0.000421054748096317	0.0560870969087888
ContigAmph19780	112.305093836432	1.17508261255158	0.333442283748081	3.52409598249802	0.000424930292250686	0.0563130698068832
ContigAmph20129	47.1051471083265	-1.51702546481396	0.430422984046471	-3.5244992043691	0.000424284088925463	0.0563130698068832
ContigAmph37786	53.8338324576766	1.5358454344745	0.437558290756812	3.51003618699136	0.000448045713727491	0.0592245387935848
ContigAmph52374	72.3603794938959	1.12818007361558	0.321808238000465	3.50575262033518	0.00045531819102362	0.0600323096552673
ContigAmph15309	234.726783800956	-1.02417656853452	0.292208068939931	-3.50495649298809	0.000456681906330473	0.0600588998645907
ContigAmph26210	244.353318553121	0.885692993061947	0.25289336725546	3.5022389186161	0.000461365701248619	0.0605208753891716
ContigAmph80860	16.1566479931911	-2.23532099297642	0.638410737753151	-3.50138376563574	0.000462848821327221	0.060561717674623
ContigAmph78163	14.3568374457107	-2.40209987726565	0.686658524891952	-3.49824518328616	0.000468330377766697	0.0611242102133686
ContigAmph85712	47.5968200349408	1.19683855392199	0.34232950839285	3.49615947377965	0.000472006516657254	0.0614488282290013
ContigAmph34351	14.7561314143913	2.37317552690498	0.682744329587173	3.47593590171586	0.000509073942959577	0.0659422999196059
ContigAmph82121	10.1157643128937	3.37615339544612	0.971247984694623	3.47609822480882	0.000508765910435051	0.0659422999196059
ContigAmph62847	61.7138859121502	1.58153727059482	0.456265950072818	3.466261881568	0.000527748970545492	0.068190444484183
ContigAmph34010	904.756853869853	0.851903858717182	0.246252401138985	3.45947432299905	0.000541230877930901	0.0697580466208994
ContigAmph10397	5423.04897131354	0.722347506719597	0.209047076758427	3.45542983867856	0.000549416162712845	0.070636877994156
ContigAmph79059	18.3960323111925	-2.33158311921818	0.675721829052362	-3.45050732264786	0.0005595339878475	0.0717591926250873
ContigAmph25844	28.381437477898	1.47837201918273	0.428752141344106	3.44808078286943	0.000564585149018952	0.0722277694106325
ContigAmph23793	118.275852901395	0.970120083057703	0.281552562201712	3.44560914477731	0.00056977382066549	0.072711580610556
ContigAmph25069	313.995671912562	-0.887711458217655	0.257798771047755	-3.4434278123584	0.000574389911453817	0.0731201186787662
ContigAmph10621	77.7571092482089	-1.21068707908008	0.351825243165933	-3.44116035616318	0.000579225150427847	0.0733741977321393
ContigAmph29528	65.8725983405949	1.15388734882235	0.335284335040376	3.44151881919385	0.000578458232004222	0.0733741977321393
ContigAmph4114	157.297137720252	-0.858639815213237	0.24996594132017	-3.43502723082359	0.000592494288354177	0.0748715765263992
ContigAmph92563	15.7130988756098	2.31308079641603	0.673914439180701	3.43230633139144	0.000598471152093889	0.0754423976215135
ContigAmph13795	913.218697855996	0.69948447375907	0.20383988410504	3.43153881209343	0.000600167243219794	0.0754721260305884
ContigAmph25635	914.357918804638	0.596682119859148	0.174077574281781	3.42767942580182	0.000608763866034804	0.0763673583789874
ContigAmph26697	91.4771689223823	-1.66140907400728	0.484979205711438	-3.42573259727721	0.000613143697428019	0.0767305541352778
ContigAmph24504	12.8992883764082	2.37835610579124	0.694407111341651	3.42501692011198	0.000614761133035006	0.0767471362313557
ContigAmph17986	137.590708118932	0.880783121744741	0.25732629845564	3.42282591025797	0.000619737547778002	0.0771819648659235
ContigAmph7935	217.543084406293	0.696295951038094	0.203687981424251	3.41844396595897	0.000629802842368026	0.078246947367666
ContigAmph28847	367.572044443413	0.742625200110849	0.217305393707445	3.41742644966574	0.000632161726061671	0.078351670622953
ContigAmph91105	34.6020017691896	1.40555363180215	0.411540614458773	3.4153460981017	0.00063701015714746	0.078763715220118
ContigAmph13497	2089.77852437933	0.516739697325301	0.151450013811999	3.4119488293131	0.000645002199633294	0.0795615601094204
ContigAmph14304	191.281538361901	0.711562738221669	0.2087437186905	3.4087863466526	0.000652525629888643	0.0801072082070419
ContigAmph14735	332.349298210251	0.918090187752197	0.269313774637387	3.40899825487331	0.000652018968024298	0.0801072082070419
ContigAmph9318	66.7034803872086	1.03737169540309	0.30562705484246	3.39424039516993	0.000688192534304079	0.0842856467842939
ContigAmph9828	35.263698245139	1.31807872620827	0.388616351085106	3.39172225390901	0.00069454807259099	0.0848629375503374
ContigAmph14563	317.520315957927	0.710775791824968	0.209840160924719	3.38722477476541	0.000706035170256607	0.086063022970619
ContigAmph4803	39.8942492688646	-1.27629016381791	0.376886231857066	-3.38640697360881	0.000708142806969576	0.0861168302009778
ContigAmph11899	1007.82563886812	0.534081823937395	0.157782655383603	3.38492100186125	0.000711987422107329	0.0863811218877822
ContigAmph11555	135.01169308083	0.773852485443019	0.22901973709557	3.37897726744874	0.000727560239825938	0.0880637551174795
ContigAmph15997	27.9943158568098	1.74881628215424	0.517796168670228	3.3774222135429	0.000731686446249198	0.0883562670279054
ContigAmph27816	39.9787613640063	1.76598167540188	0.523549655595135	3.37309299419638	0.00074328844433414	0.0895480651677522
ContigAmph35794	32.3354374673897	1.37912308485903	0.410205923537742	3.36202625492349	0.000773727664948212	0.0929984665934498
ContigAmph86774	16.4004712188712	2.20494565922276	0.656156895487411	3.36039394600109	0.000778314058190399	0.0933326769919085
ContigAmph90220	59.4548117635839	1.27810945220431	0.380559889917575	3.35849753499018	0.000783674201889423	0.0937579107649373
ContigAmph14700	60.9058837968117	1.33907018492155	0.398951376144099	3.35647466080648	0.00078942954461101	0.0942283523872413
ContigAmph21181	208.185786698872	0.784245081114578	0.233710495992018	3.35562627508764	0.000791854970111083	0.0943000743668692
ContigAmph41477	19.8206187474589	2.31515590419918	0.691399105420804	3.34850867761843	0.000812477364361801	0.096533517470518
ContigAmph35769	93.5017865897398	0.918227245428412	0.274306141411568	3.34745420100058	0.000815574628195176	0.0966792639533015
ContigAmph6449	77.8344774095999	1.11598470309187	0.333473823448104	3.34654364037524	0.00081825798511814	0.0967753906243614
ContigAmph59378	11.0779673608154	2.64806283918784	0.792249500499823	3.34246072420014	0.000830391058479218	0.0978283933764497
ContigAmph81547	15.5171463605188	-2.42977435127589	0.726982181589557	-3.34227497290669	0.00083094699892155	0.0978283933764497
ContigAmph15522	559.74571520937	0.582020998649454	0.174517979725822	3.33502026303446	0.000852931838683802	0.0999636701933989
ContigAmph20097	145.375652020618	1.06779261449035	0.320176385662802	3.33501364343251	0.000852952142931834	0.0999636701933989
ContigAmph3339	429.462136092102	-1.28488815795304	0.38535569832975	-3.33429131454949	0.000855170431185063	0.0999968972067167
ContigAmph17089	113.334730985167	1.06211835360847	0.318690990124152	3.33275300062517	0.00085991246869686	0.100324415422412
ContigAmph21606	46.0745287549592	1.22294956786758	0.367256679691153	3.32995867875304	0.00086858873079182	0.101108423338388
ContigAmph26451	694.102202058363	0.559590553692969	0.168227457485607	3.32639250486708	0.000879779465318059	0.102064384695934
ContigAmph35245	34.0362824496388	1.38871086100703	0.417521157040264	3.32608500812597	0.000880750630260552	0.102064384695934
ContigAmph70035	30.634246098473	-1.8180512743862	0.546912068848074	-3.3242112908853	0.000886689890437976	0.102522774714533
ContigAmph17639	305.43052343888	1.05471842868957	0.318437392200209	3.31216890517193	0.0009257563473135	0.106800872889623
ContigAmph76807	16.9455110089093	2.03226011596329	0.61383251062269	3.31077302162067	0.000930386418993335	0.10709597255958
ContigAmph23630	173.331773846036	0.869644734007733	0.262864202573791	3.30834219910034	0.000938500575673984	0.107789919451409
ContigAmph612	2298.1046793013	0.626508932700299	0.189410526984074	3.30767747007524	0.000940730848171301	0.107806503673804
ContigAmph16290	205.425674833859	0.685570291898895	0.207310412868026	3.3069747072248	0.000943094068935141	0.107838216501867
ContigAmph72032	53.0774330529338	3.3514536759244	1.01383377820621	3.30572303662458	0.000947316758583425	0.108081941171359
ContigAmph12659	69.1384730737458	1.10658631969035	0.335022250269312	3.30302336277907	0.000956484186745383	0.108887508166847
ContigAmph11903	75.183700097812	-1.01606018636608	0.307726299950827	-3.30183083645577	0.000960559820090617	0.109111151080359
ContigAmph26213	341.696475080576	-0.798797257995725	0.242084510905307	-3.29966281200114	0.000968010590433131	0.109670510292464
ContigAmph54111	14.5681280092263	2.54144886690515	0.770330875343114	3.29916526554016	0.000969728024217472	0.109670510292464
ContigAmph62977	82.4993810184629	1.24298738992302	0.377297662547301	3.29444762930964	0.000986153188688616	0.111284588218739
ContigAmph19812	68.2538007854051	1.35442047668067	0.411406950251398	3.29216722238898	0.000994184783060373	0.11194650616055
ContigAmph9050	636.980221885976	-0.709896602929827	0.215777808980666	-3.28994258623432	0.00100207827123787	0.112590029066648
ContigAmph4565	377.491344395314	0.735940382035148	0.223974969243506	3.28581530570513	0.0010168766203809	0.114004883400794
ContigAmph44949	48.6111536964275	1.18021068821183	0.359270961774779	3.28501552806175	0.00101976751329405	0.114081524149545
ContigAmph6951	57.5325256214047	-1.0164270389994	0.309539993047877	-3.28366951550001	0.00102465001790811	0.114380154482857
ContigAmph27299	78.1257238283303	0.930337609421501	0.283603075475068	3.28042144064579	0.00103652126695241	0.11545595939907
ContigAmph19708	38.301551745239	1.75764567078986	0.53627814544138	3.2774889033437	0.00104734847177891	0.116411093366497
ContigAmph17773	233.522427875619	0.906533645517125	0.277312979137371	3.26899104519757	0.0010793171730589	0.119706928696086
ContigAmph22663	766.560032233376	0.586411648235339	0.179496566384519	3.26697975369135	0.00108701454010668	0.120302482849836
ContigAmph93578	89.6037776816558	0.885072034874813	0.27118148105113	3.26376281833174	0.00109943161371866	0.121416716930417
ContigAmph16200	1131.19257855397	0.606277605656095	0.185976366833638	3.25997123171264	0.00111423514897093	0.122789188570178
ContigAmph18765	96.8855489083896	-0.908319842081248	0.278784345235144	-3.25814507738989	0.00112143058923383	0.123141680733042
ContigAmph28785	28.8535636260424	-1.34351987595535	0.412447935309587	-3.25742902542813	0.00112426369443165	0.123141680733042
ContigAmph93291	1172.21834369395	-0.707230461600285	0.217118431887332	-3.25734879094597	0.00112458155920586	0.123141680733042
ContigAmph12923	154.94390583865	0.813152847412555	0.249693524506345	3.25660366651555	0.00112753748830527	0.123204328848984
ContigAmph1839	733.619693317366	0.567282035980066	0.174728149626112	3.24665508788338	0.00116769808331054	0.127323434046038
ContigAmph71477	86.0549355673923	-1.13686893232917	0.351125880991882	-3.23778164434268	0.00120462970387447	0.131073856031681
ContigAmph10768	218.707822376328	-0.634326141112256	0.196175129843408	-3.23346869513272	0.0012229673862268	0.132789593255768
ContigAmph77690	102.190829103253	0.872417144509856	0.270405247380324	3.22633215502214	0.00125387750642897	0.135860387929298
ContigAmph64563	11.6326847222383	3.17711951463585	0.986737408027136	3.21982270945633	0.00128269898002983	0.138692498083393
ContigAmph95375	286.698386436353	-0.897097277992069	0.278680214946401	-3.2190920986788	0.00128597175006936	0.13875608336239
ContigAmph31193	73.3171609390631	0.959555812562856	0.298171394555619	3.21813503938879	0.00129027055772452	0.138929882302988
ContigAmph16259	128.931314070661	0.79711177737954	0.247787690509438	3.21691435010641	0.00129577275551726	0.138943400614428
ContigAmph68974	31.9133283987167	1.54123091269117	0.479087273954745	3.2170149291771	0.00129531858288408	0.138943400614428
ContigAmph15937	225.335976225611	0.72814697527473	0.226592598643672	3.21346319179549	0.00131144606230545	0.13946662198394
ContigAmph23302	61.1010784741785	-1.27451371820415	0.396579413529638	-3.21376671285258	0.00131006064812639	0.13946662198394
ContigAmph49823	33.7740324880125	1.33615508550907	0.41571987660564	3.21407553667822	0.00130865241592898	0.13946662198394
ContigAmph80792	619.706981817487	2.12292271752437	0.660360176649407	3.2147951869173	0.00130537624016658	0.13946662198394
ContigAmph1608	70.8207578070796	1.08063747877957	0.336593540525061	3.21051163695492	0.00132498903549854	0.140617522198576
ContigAmph22090	3264.70109931714	0.939773557622814	0.292827625424291	3.20930634963533	0.00133055641565786	0.140919011858321
ContigAmph62023	12.7765324724197	2.31345760069273	0.722165549209146	3.20350036529191	0.0013576786781723	0.143497474034063
ContigAmph82155	45.9918003426859	1.45014034767819	0.452960229577212	3.20147388884833	0.00136726466333962	0.144215728285806
ContigAmph35487	28.4294060535874	1.6391622798355	0.512703722199436	3.19709455746429	0.00138819412043	0.146125101670681
ContigAmph29034	112.273847632997	0.96925846505109	0.30342903754758	3.19434973292265	0.00140146223767049	0.147221898966995
ContigAmph31594	37.2275237522572	1.25613287528688	0.393380737080127	3.19317332264548	0.00140718456599586	0.147523178719939
ContigAmph89216	17.8520348688089	2.41268862091116	0.755798984111324	3.19223586116357	0.00141176000819431	0.147703247496993
ContigAmph70572	15.7959196849944	2.38852593296878	0.748904793342213	3.18935858630209	0.00142588883619757	0.148880078000071
ContigAmph83706	21.930534963693	2.17685781738473	0.682819410776238	3.18804325569779	0.00143239107045383	0.149257459849467
ContigAmph93232	25.6942392366839	1.48532692494886	0.466138158681929	3.18645212215371	0.00144029324246811	0.14977890531936
ContigAmph8901	35.5453470561222	1.27443858363399	0.400681815083529	3.18067487881454	0.001469324264617	0.152491074884467
ContigAmph33322	75.3260271874103	1.05223540045741	0.331009859527777	3.17886422464436	0.00147853330976966	0.153139309783838
ContigAmph26038	505.334486988368	-0.880561847317936	0.277309160525933	-3.17537958590296	0.00149640612944272	0.154680508788235
ContigAmph3639	915.806900616301	0.660260106919746	0.208083503317853	3.17305358854509	0.00150844679141097	0.155451480614751
ContigAmph34423	66.5166397266569	0.948102512845063	0.298824109212424	3.17277784360796	0.00150988010348667	0.155451480614751
ContigAmph11523	30.7610730028259	-1.30373978417614	0.411028146015526	-3.1718990458792	0.00151445643680077	0.155612657017119
ContigAmph25653	88.9923141844875	0.826642202786108	0.261150713526236	3.16538366533339	0.00154878581571543	0.158824297816341
ContigAmph18627	127.524889893111	-0.914274855375801	0.289500689598442	-3.15810942158364	0.00158795941432278	0.162304022107312
ContigAmph20556	309.027377146542	0.610272143873498	0.193251385261586	3.15791859937993	0.00158899921032234	0.162304022107312
ContigAmph6281	1128.78404170027	0.806724207594882	0.255895695069529	3.1525509148393	0.00161850593293192	0.164991835577225
ContigAmph29123	219.887369961443	0.818505964086943	0.25976129675681	3.1509927549108	0.00162716526483868	0.165531142939068
ContigAmph71009	18.8019030246701	1.68540733126064	0.534973833914466	3.15044816104054	0.00163020183724142	0.165531142939068
ContigAmph12476	287.338466432424	0.713908239989157	0.226735544567251	3.14863838994334	0.00164033034596071	0.166233007060066
ContigAmph19798	84.0808421529145	1.30714539908046	0.415429946284465	3.14648814023001	0.00165243962921516	0.167132465354904
ContigAmph71309	97.8590768941703	1.08459828654053	0.344766942326056	3.1458882897038	0.00165583237357638	0.167148516398285
ContigAmph5002	146.795011739786	0.865771369693488	0.275422045804169	3.14343525829835	0.00166977348158968	0.16822723708086
ContigAmph7674	1377.65908065352	-0.569159693425575	0.181418610431101	-3.13727291854509	0.00170527312257067	0.171469525422068
ContigAmph5415	1209.60613108366	0.522014235846254	0.166479175700538	3.1356128095279	0.00171495456880664	0.172108178513014
ContigAmph54201	20.9301565833592	2.0174532151893	0.643653322557656	3.13437862353081	0.00172218484369821	0.172498840042051
ContigAmph95131	510.656272600234	-0.613748091867023	0.196050627302078	-3.13055918419149	0.00174473838753046	0.174419842980898
ContigAmph9448	336.764381056348	0.564236919990917	0.180379197804426	3.12805981431787	0.00175964367320655	0.175232030069378
ContigAmph18408	170.420372382478	0.751804695019503	0.240340856501025	3.12807695688768	0.00175954104397025	0.175232030069378
ContigAmph9543	18.0620919734752	1.82726271354309	0.584716076904177	3.12504270998956	0.00177779245422613	0.176698894623506
ContigAmph23091	121.276486189612	0.861325427714896	0.275925903251515	3.12158234353869	0.00179881934682987	0.178445641308167
ContigAmph18870	459.289238177104	-0.727949635937787	0.233326812832575	-3.11987133883379	0.0018093004897307	0.179141545040693
ContigAmph3225	58.0525756576864	1.20425078718204	0.386091609321346	3.11908044129428	0.00181416425257969	0.179279665832368
ContigAmph92905	20.1610823378693	1.87061154549912	0.599934770270871	3.11802488903008	0.00182067427611748	0.179579636043618
ContigAmph15611	84.6309062610896	0.935530077656166	0.30020465117995	3.11630773866787	0.00183131052883716	0.180284673090323
ContigAmph46477	183.856426605359	0.717959768074424	0.230467244241736	3.11523561813131	0.00183798030476	0.180597289108775
ContigAmph14437	77.7458769002716	0.875037412330249	0.281428771273936	3.10926778512816	0.00187551648857279	0.183935852363181
ContigAmph4419	634.303036191431	0.618414522274909	0.198987958294047	3.1077987209712	0.00188486391243722	0.184093923202963
ContigAmph8894	79.3385268425018	-1.05448844709261	0.339303179692882	-3.10780596883022	0.00188481769060076	0.184093923202963
ContigAmph48840	14.5537951202701	2.19484800892843	0.706408667163658	3.10705135844538	0.00188963566683956	0.184093923202963
ContigAmph75387	17.7351791289477	1.8401097755431	0.592288553863808	3.10677922701545	0.00189137592331811	0.184093923202963
ContigAmph7183	207.06331224527	-0.701452552751359	0.226122473863368	-3.10209127278169	0.00192158701149378	0.186682900567753
ContigAmph6198	596.565510167217	-0.54587505502405	0.176085247324639	-3.10006126758393	0.00193480616422754	0.187614487414515
ContigAmph10864	32.5785298764449	-1.52126863388798	0.491346719693717	-3.09612046425438	0.00196070687928091	0.189769989417144
ContigAmph58939	74.6190611890016	0.872393882827987	0.281845069420696	3.09529588231259	0.00196616650841964	0.189942709946095
ContigAmph7357	289.158766247737	0.701165447235552	0.226984509636496	3.08904536418998	0.00200800775618525	0.193170425994363
ContigAmph12242	266.890495144377	0.711014266057878	0.230239025793529	3.08815702988377	0.00201402018258449	0.193170425994363
ContigAmph14450	118.608650969424	0.784680973509057	0.253980344634358	3.08953424974173	0.00200470591121772	0.193170425994363
ContigAmph89971	154.006884402533	-0.933860596434075	0.302407953523397	-3.08808212731688	0.00201452789279007	0.193170425994363
ContigAmph56514	28.6728555458047	1.37713806677508	0.446284714776515	3.08578362910034	0.00203016496418948	0.194309344461424
ContigAmph10199	343.145606920398	0.620328929960764	0.201164512722308	3.08368967053887	0.00204450738599874	0.194856888777506
ContigAmph54993	52.4575121740015	-1.11286843598919	0.360934368867409	-3.08329860489958	0.00204719624267057	0.194856888777506
ContigAmph75788	165.443421406603	-0.886602702226692	0.287545778714033	-3.08334452410247	0.00204688034719507	0.194856888777506
ContigAmph11885	161.146235563692	1.35930433985619	0.441463817098575	3.07908437160246	0.00207637868954881	0.197271242997501
ContigAmph77334	88.1052499759066	0.922827957311141	0.299904263558188	3.0770751517912	0.00209042590707395	0.198241417580202
ContigAmph54018	29.9086024333898	1.339376470348	0.435399683770488	3.07619991532659	0.00209657222847221	0.198460144791864
ContigAmph18725	154.103432381	-0.799147468927456	0.260112659805842	-3.07231285675972	0.00212406974801775	0.200695467745063
ContigAmph25310	262.395574428097	-1.20551160506134	0.393461569205646	-3.06386112243473	0.00218500316507739	0.206076101430401
ContigAmph70831	62.364404201856	1.22318115301175	0.400038366577762	3.05765960269209	0.0022307281433579	0.210005379528797
ContigAmph82333	57.5494854593337	1.52822178607436	0.499932289498539	3.05685753486187	0.00223670555162303	0.2101852540547
ContigAmph16934	123.781266568551	1.18943991427727	0.389340357087379	3.05501315911703	0.00225050647575943	0.211098324306988
ContigAmph10600	519.280108955498	1.08267340642763	0.354841994456006	3.05114226428423	0.00227972529709569	0.213451670751981
ContigAmph585	817.375592850906	-0.92448483515987	0.303117933073829	-3.04991798335698	0.00228903866801027	0.213549954002604
ContigAmph12092	984.898890006083	0.750716267408839	0.246136253410374	3.05000282163716	0.00228839216260528	0.213549954002604
ContigAmph25312	250.829137110993	-1.03919821016218	0.340885569765908	-3.04852508387439	0.00229967713240665	0.214155879119469
ContigAmph27728	91.2320459717004	0.814577334424788	0.267358251076029	3.04676340134026	0.00231319708576851	0.215027478742554
ContigAmph68259	35.3410929511051	1.25876777566734	0.413335880669683	3.04538714042414	0.00232380974592214	0.215626181163806
ContigAmph9677	107.81608561834	-0.870967810904749	0.286235159225638	-3.04284006640207	0.00234356851908958	0.217069884122985
ContigAmph5710	790.224673039306	0.528333697708473	0.173712772470472	3.04142113556031	0.00235464239687078	0.21731667435691
ContigAmph12382	1146.75365544611	0.550279684623179	0.180897108122113	3.04194848848395	0.00235052115103959	0.21731667435691
ContigAmph54771	125.910504993004	-0.978541954416972	0.32219428724124	-3.03711764350526	0.0023885221597375	0.219659037907247
ContigAmph65929	40.7249103625136	1.2196174564475	0.401564883795877	3.03716162857372	0.00238817363627027	0.219659037907247
ContigAmph17244	104.252422822488	0.897604757060739	0.29594098915934	3.0330531759406	0.0024209293594211	0.221957435335275
ContigAmph40853	20.0880560020398	1.62110507702758	0.534505393803242	3.03290686272163	0.00242210342715531	0.221957435335275
ContigAmph4407	480.351401098396	-0.647012997180893	0.213549533395604	-3.02980290751697	0.00244713375403124	0.222681296460815
ContigAmph27986	67.9769360683322	0.93484995848971	0.308455235008785	3.03074758469599	0.00243949092231749	0.222681296460815
ContigAmph51036	56.4236324571572	1.17039453440862	0.386262699278136	3.03004803879821	0.00244514843744593	0.222681296460815
ContigAmph73382	29.3261142314523	1.43631863668016	0.474065375898671	3.02979021397076	0.00244723659913596	0.222681296460815
ContigAmph31088	52.6618423464195	-1.09441722984807	0.36133152155152	-3.02884515900733	0.00245490470182484	0.222986458012504
ContigAmph497	1242.36855711762	-0.532742182431376	0.176045380549443	-3.02616394005154	0.00247677973609676	0.224316124868639
ContigAmph10137	266.412227306194	0.699587997011406	0.231193269422431	3.02598773207854	0.00247822357596148	0.224316124868639
ContigAmph92187	26.3401360063286	1.43052209125804	0.47329459449407	3.02247713770574	0.00250715020408857	0.226537676832366
ContigAmph26748	98.6457463367342	-0.772826780472933	0.255784004328939	-3.02140386964571	0.00251605518139357	0.226668868206895
ContigAmph63975	113.416310355241	0.768519680971095	0.254371826839011	3.02124527909092	0.00251737346859294	0.226668868206895
ContigAmph39682	21.0686306582525	1.7434115485704	0.577710133786141	3.01779637678258	0.0025461992721627	0.228865675099925
ContigAmph4181	293.844301313839	-0.558426551325322	0.185082524420283	-3.01717600337703	0.00255141625319054	0.228936454218576
ContigAmph90208	24.5392725367426	1.38057629846325	0.457653781618174	3.01663911435802	0.00255593906797493	0.228944808993442
ContigAmph5128	161.324725116137	0.70971880179046	0.23553045178087	3.01327831040192	0.00258441786746737	0.230696119278383
ContigAmph85592	18.2430639376848	1.76619981887565	0.586136944248318	3.01328867973112	0.00258432955533047	0.230696119278383
ContigAmph11603	187.451159641223	0.957543267323003	0.318540469827743	3.00603332393153	0.00264679989347761	0.235857251197409
ContigAmph9131	286.739380610526	0.613802082672262	0.204321261826049	3.00410283876784	0.00266365273768127	0.236543347241097
ContigAmph65632	64.8283968520758	-0.940349314221819	0.313015647806157	-3.00416072107728	0.00266314601095677	0.236543347241097
ContigAmph18737	203.880144475329	0.889905725597755	0.296496739784929	3.00140138553722	0.00268740068509915	0.238242910821037
ContigAmph33202	33.4763286969417	1.2412753916414	0.413655771652402	3.0007447658302	0.00269320205457811	0.238348381830163
ContigAmph19221	36.7354811278771	1.16150750830303	0.387432422904889	2.99796155312527	0.00271791958509089	0.239774675986929
ContigAmph61402	31.4013652360205	1.2341017350572	0.411657378746169	2.99788561744244	0.00271859686031151	0.239774675986929
ContigAmph91709	118.547161249678	-0.738455118376874	0.24657708957742	-2.99482453800727	0.00274602755898182	0.241781411172771
ContigAmph25498	416.280192096052	0.882499746135379	0.295326530268292	2.98821695881391	0.00280610278512254	0.246650708071893
ContigAmph12829	55.7619209337244	-0.973794773417807	0.326012425322113	-2.98698668449725	0.00281741993507388	0.247225011756126
ContigAmph12803	53.8136831194408	1.56942390711223	0.525909100144506	2.9842113526482	0.0028431031083621	0.24905583229252
ContigAmph85182	31.2573182069108	1.35540429543531	0.455094008966159	2.97829518458043	0.00289856681417031	0.253484817637188
ContigAmph10191	123.845928464769	0.717200498471124	0.241159048033583	2.97397300378815	0.00293970937203841	0.256648545919651
ContigAmph6452	18.8051466313144	1.68741739637162	0.568214652074932	2.96968300660628	0.00298107189224619	0.25982077517513
ContigAmph6972	708.546720828668	-0.504187116833951	0.170074771856525	-2.96450267920561	0.00303172603108455	0.263790788199619
ContigAmph24243	238.364519738506	0.716880222925687	0.242317033384745	2.95843925171963	0.00309201179099453	0.268327420611238
ContigAmph80123	68.8418012420194	1.03055995934435	0.348372070591952	2.95821636215907	0.00309424856211395	0.268327420611238
ContigAmph1089	193.677837919068	0.907086295569486	0.306752438293335	2.95706303303146	0.00310584619156035	0.268432365492651
ContigAmph27224	298.137963245519	-0.735460087187071	0.248704925926535	-2.95715931016308	0.0031048765354249	0.268432365492651
ContigAmph83039	129.33627399812	0.899006351366887	0.304081741443107	2.95646278234397	0.00311189785206457	0.268506391629558
ContigAmph14439	145.248875592721	0.692896930528156	0.234977064777931	2.94878536840602	0.00319025452861083	0.274808525094537
ContigAmph10811	72.1571382983209	-0.99342549438833	0.336985488823298	-2.94797707123005	0.00319860787923761	0.275069633328647
ContigAmph46011	954.550239919704	0.808203133142883	0.27425550856039	2.94689845022719	0.00320978594001839	0.275572386252343
ContigAmph4817	324.411640105641	0.572633293674794	0.194361599348954	2.94622649532069	0.00321676758684336	0.275713790975808
ContigAmph24620	318.429255614979	0.687198480383485	0.233425171810579	2.94397761412439	0.00324023435580095	0.27726535173049
ContigAmph6954	957.28871309859	-0.537728923575522	0.182995426586154	-2.93848285504753	0.00329822899899648	0.281761434023362
ContigAmph3965	26.4998660260011	1.46177496313089	0.497558213312663	2.93789736360419	0.00330446400639503	0.281828247040464
ContigAmph14092	112.221482662073	-1.14370507078835	0.3899850354034	-2.93268963411711	0.00336039633442718	0.286126398926745
ContigAmph83957	11.2030288927471	-2.01560680502407	0.687533520329043	-2.93164877846164	0.00337167822981366	0.286614831627778
ContigAmph42804	23.8743535031225	1.42875047973624	0.487675872780898	2.92971327777404	0.00339274897328335	0.287932410402589
ContigAmph14573	34.9006631326303	1.15383515404248	0.394029305309798	2.92829781565435	0.00340823416008638	0.288772416934269
ContigAmph389	566.062203211013	-0.612498172397257	0.209419174009333	-2.92474734128195	0.00344735995316396	0.291609413779584
ContigAmph7083	1246.73783747755	-0.873814763582762	0.298935178424989	-2.92309111355399	0.00346575084491177	0.292208591628744
ContigAmph93722	86.7685519336805	-1.04565618137242	0.357664735539742	-2.92356522035769	0.00346047722217477	0.292208591628744
ContigAmph1139	37.8395758701128	1.30462939644946	0.446559458254542	2.92151329981642	0.00348335402888526	0.293214445649684
ContigAmph13176	269.596099042833	0.722220546798418	0.247257532308132	2.9209243498329	0.00348994559062937	0.293291622611525
ContigAmph11278	71.4734246283317	0.973194328887251	0.33347485908507	2.91834392420865	0.00351895988514325	0.295066852537845
ContigAmph20178	682.28999944518	0.745197212524737	0.255376685002946	2.91803150517103	0.00352248757866749	0.295066852537845
ContigAmph72751	19.9621063651298	1.52022530212115	0.521532349865044	2.91492043113823	0.00355779237865346	0.297541976210882
ContigAmph10754	312.257948790002	-1.15300023331968	0.395762315071961	-2.91336539485835	0.00357555949049618	0.298063252752911
ContigAmph87711	318.716114818261	0.539823286797827	0.185281511369125	2.91353024275784	0.00357367219889354	0.298063252752911
ContigAmph16489	160.281609366732	1.03263907423033	0.355227548012979	2.90697914620237	0.00364937525559011	0.303726748325152
ContigAmph67083	12.4442331114768	1.90477301902325	0.656211151383712	2.90268309980221	0.00369980811209908	0.30742907148831
ContigAmph81273	205.126000990675	1.0328496321475	0.356591528922584	2.89645027538423	0.00377410447628998	0.313099222716808
ContigAmph13614	280.44699164246	0.765323986793434	0.264351320059394	2.89510181610397	0.0037903556916792	0.313943499308891
ContigAmph17888	100.347840774978	0.750343318807105	0.259342640181299	2.89325086797358	0.00381276630466373	0.314790756693674
ContigAmph84970	123.579200330378	0.917193821691243	0.316993337141429	2.89341671961398	0.00381075333295786	0.314790756693674
ContigAmph75171	12.0521054314376	2.09809308759182	0.725825815488957	2.89062891236299	0.00384471809858251	0.316922504317605
ContigAmph84424	60.6353303996395	0.935606363484602	0.324417896091488	2.8839542292721	0.00392715828058087	0.32268878946509
ContigAmph86408	119.965835406768	1.14738609015759	0.397818207016482	2.88419702748813	0.00392413151900267	0.32268878946509
ContigAmph22567	232.599683110477	0.629835173995552	0.218587739141771	2.88138381625812	0.00395933175003972	0.324816035188973
ContigAmph17611	232.58217142719	-0.863117982745462	0.300396878348121	-2.87325882842637	0.00406261127868091	0.332536838530548
ContigAmph83036	148.216203681165	0.92377156201694	0.321538751310596	2.87297116833239	0.00406631224269226	0.332536838530548
ContigAmph21617	139.134410710799	0.769651791798905	0.268169098808308	2.8700241572168	0.00410440440739666	0.334597761903948
ContigAmph84556	229.519471953425	1.02925775087597	0.358686209761962	2.86952138906879	0.00411093527608171	0.334597761903948
ContigAmph87732	49.5897745909919	0.950400863903635	0.331162551078539	2.86989232571239	0.00410611596378329	0.334597761903948
ContigAmph13681	705.319715400259	0.583898979839966	0.203684385716853	2.86668503226192	0.00414795603285426	0.335499238942398
ContigAmph23397	32.8683134203307	1.38576404306783	0.483403226984761	2.86668347605283	0.0041479764276022	0.335499238942398
ContigAmph27233	451.395042079602	-0.712330372780839	0.248461238048463	-2.86696781508388	0.00414425155992562	0.335499238942398
ContigAmph34777	110.175937703684	0.770603988413756	0.268732376662176	2.86755171812618	0.00413661188990726	0.335499238942398
ContigAmph5816	1641.0723971104	0.851644538212543	0.297421716053425	2.86342419616584	0.00419089079406676	0.338338048382385
ContigAmph19958	402.913715319733	-0.526829195546423	0.184028007891967	-2.86276638855807	0.00419960072577052	0.338338048382385
ContigAmph25777	86.0658104237081	0.858066143795527	0.2997577864827	2.86253162549641	0.00420271316193582	0.338338048382385
ContigAmph89852	53.1021092489144	-1.18358884330201	0.413576887579147	-2.86183507552875	0.00421196018397981	0.338555132424281
ContigAmph1834	30.7702447151804	1.34527280264109	0.470619067303879	2.85851742120862	0.00425625736923426	0.339950822389225
ContigAmph4915	505.07417109187	-0.480989838082728	0.168255922623396	-2.85867998334489	0.00425407704043524	0.339950822389225
ContigAmph10503	127.567678435762	0.79695291523719	0.278842656897318	2.85807388333221	0.00426221137892226	0.339950822389225
ContigAmph19324	368.185961208125	1.88558620279001	0.659717895962386	2.8581704609352	0.00426091428757061	0.339950822389225
ContigAmph93338	76.3808776385853	0.921232105302454	0.32224474999205	2.8587963196458	0.00425251732735031	0.339950822389225
ContigAmph10779	60.5081493027832	0.990075808360926	0.346611638604737	2.85644132535888	0.00428419180440795	0.34117745642376
ContigAmph21119	43.5332709980259	1.12391617284116	0.393597865554726	2.8554935664022	0.00429699934484411	0.341670944829112
ContigAmph48039	18.1385868139099	2.1588856097592	0.756470399625842	2.85389304171981	0.00431870687606669	0.342869502584686
ContigAmph54278	12.9705259084506	2.42338077671462	0.849358083414158	2.85319092622675	0.00432826083653697	0.343100970974811
ContigAmph92612	57.3085919938897	-0.90802890950023	0.318435434499868	-2.8515322452301	0.00435090730999711	0.344367983782374
ContigAmph6328	1544.7526636177	-0.555927434781157	0.19525420303496	-2.84719829914042	0.00441058789359936	0.348557835921696
ContigAmph10056	299.079471309543	0.603246926188839	0.21195446930962	2.84611562168866	0.00442561226200535	0.34912074329279
ContigAmph16879	56.6466983266001	-1.08448252159019	0.381093517813543	-2.84571232754683	0.00443122064081864	0.34912074329279
ContigAmph6977	283.089348487593	0.562128330311295	0.197738233594467	2.84279028942952	0.00447204851561295	0.351801149894885
ContigAmph21681	392.323656657147	0.608742757900015	0.214212707858515	2.84176771763738	0.00448641661008357	0.352395070023646
ContigAmph10031	38.608491664682	-1.22812979784051	0.433340529916509	-2.83409862003245	0.00459551474888592	0.359856752359981
ContigAmph27113	321.558377129025	0.803220725344562	0.283460281933933	2.83362706007528	0.00460230077606121	0.359856752359981
ContigAmph87389	57.7054302989677	0.917821349557657	0.323813067675756	2.83441726470625	0.00459093439509568	0.359856752359981
ContigAmph6035	353.873694412876	0.543323468967823	0.191825361720198	2.83238599993014	0.00462020375907591	0.360067586371399
ContigAmph74833	11.305862937633	2.02247993741742	0.714126750359329	2.83210219530324	0.00462430664834234	0.360067586371399
ContigAmph87598	48.434733992312	1.38007353532983	0.487315439078642	2.83199222651166	0.00462589732510271	0.360067586371399
ContigAmph23306	185.073704889696	0.769884073576264	0.27209133311254	2.82950605140308	0.00466199183658105	0.362331407641888
ContigAmph62244	40.9559194825202	1.3298251279248	0.470555430166792	2.82607540508763	0.00471221698317808	0.365685018856721
ContigAmph3471	72.5967753379498	0.849163625547118	0.301081753381013	2.82037558241704	0.00479674705341196	0.371686768678476
ContigAmph81202	132.31684318949	-0.666944568870576	0.236570925888931	-2.8192161245702	0.00481410920273441	0.371916920828289
ContigAmph81284	79.5004936666906	0.84127584260465	0.298391066162129	2.81937342637312	0.0048117503782133	0.371916920828289
ContigAmph19629	177.01981847579	0.686769171097617	0.243959566732357	2.8150942399855	0.00487629319816247	0.376158712916162
ContigAmph62058	48.3279423046371	1.04083019545758	0.370466616269814	2.80951143705628	0.00496167561931728	0.382174728329052
ContigAmph326	140.59266742075	0.633205098575829	0.225468542694685	2.80839664375386	0.00497888615767306	0.38292969073389
ContigAmph6289	594.942854650638	-0.461862940160334	0.164544156178856	-2.80692399466499	0.00500170414618005	0.384113041740222
ContigAmph5939	113.724688205101	0.869295136026458	0.309927189387072	2.80483663839117	0.00503420873660647	0.385488095484093
ContigAmph78329	25.919256769002	1.4974995826942	0.53390290996574	2.8048162966377	0.00503452643858375	0.385488095484093
ContigAmph8180	2459.50683229862	0.508883351409837	0.181731375160119	2.80019534855482	0.00510716896243999	0.390029115763104
ContigAmph75170	104.537457072335	0.69940901588411	0.249781410317368	2.80008434172684	0.00510892561279354	0.390029115763104
ContigAmph11304	128.988129711658	0.727066823681176	0.259726221051959	2.79935857356399	0.0051204241440014	0.390330385632107
ContigAmph80723	62.3772063848075	1.06632997252222	0.381236693754265	2.79702869632363	0.00515749522736157	0.392577295038226
ContigAmph33148	38.5409952363813	1.33023172279322	0.475871424635194	2.7953595318588	0.00518420253271783	0.394029887795571
ContigAmph47798	22.8888697448171	1.42180850912983	0.509038338139933	2.7931265733839	0.00522012617358366	0.396177681579292
ContigAmph54875	185.179902411732	-0.973870149434362	0.348952066866851	-2.79084218694701	0.00525710977039109	0.398399503479316
ContigAmph12561	90.4371313653538	1.05224025452119	0.377231217903533	2.78937745494402	0.00528094775782704	0.399620064297999
ContigAmph44720	50.3071182612555	1.02160946538239	0.366526728800344	2.78727139143756	0.00531539432005137	0.401638655025636
ContigAmph6033	693.837824978358	0.566826931010732	0.203400195948987	2.78675705481077	0.00532383752989071	0.401689370649447
ContigAmph82037	36.7037400685235	1.02882814303609	0.369521856240742	2.78421458882749	0.00536575214538621	0.404261711198456
ContigAmph23066	50.2569232911246	-1.05934113116246	0.380647648070559	-2.78299665460195	0.00538593614880312	0.405191737867162
ContigAmph1376	25.4907788121607	1.47739351606917	0.531293090152432	2.7807504811427	0.0054233403546087	0.407412678615692
ContigAmph73443	36.2283751044078	-1.08486067091976	0.390353392854609	-2.77917571815196	0.00544970363065116	0.408798958558163
ContigAmph72665	22.9206519312963	1.27990927164633	0.460945096673148	2.77670655547488	0.00549127311084767	0.411320231102973
ContigAmph26667	517.645587742635	1.74865886998194	0.630419210300751	2.77380327472527	0.00554051712148495	0.413493890004838
ContigAmph32947	54.7910329155505	-0.905630790965932	0.326446844320187	-2.77420599011111	0.00553366274112779	0.413493890004838
ContigAmph80122	186.403790179599	-0.968241075474564	0.349094138080066	-2.77358159263188	0.00554429351004862	0.413493890004838
ContigAmph618	824.894285135839	-0.568326525391504	0.205004310775931	-2.77226621840495	0.00556674893259945	0.414570391689438
ContigAmph8396	67.6292760384853	0.845309361280046	0.305222255507067	2.76948795845745	0.00561444795810183	0.417521047865518
ContigAmph49974	51.7450242602221	1.14793794614221	0.414908403916088	2.76672618656904	0.00566222905617785	0.420469319740655
ContigAmph5668	271.030718546777	-0.81820950878813	0.296162070194237	-2.7627086353479	0.00573239126156253	0.425068737392537
ContigAmph12761	306.517346092536	1.84062143299107	0.667240376067869	2.7585582332983	0.0058056960115054	0.429887668565394
ContigAmph81479	31.333202945765	1.18457454467838	0.429541545106636	2.75776478008501	0.00581980590119504	0.430315948780207
ContigAmph1435	39.6493866823028	1.5706207976245	0.57032490038589	2.75390535563465	0.00588887950271458	0.43356246184943
ContigAmph44694	10.5663050047231	2.00311311719536	0.727312347661238	2.75413049652823	0.00588482986391193	0.43356246184943
ContigAmph84631	49.1714109311724	0.98580811830876	0.357897883439124	2.75443964305097	0.00587927329453723	0.43356246184943
ContigAmph25484	229.818842738269	0.805885606801782	0.292796889102157	2.75237079626419	0.00591654879520943	0.434979954383505
ContigAmph83637	174.092446605355	0.820954474790509	0.298332955222468	2.75180619646368	0.00592675841457826	0.435111622015715
ContigAmph21413	462.39055838897	-0.752072270622614	0.274006272841246	-2.74472647222332	0.00605613515899302	0.443263037390104
ContigAmph26388	107.771118360352	1.0021425515814	0.365168851845651	2.74432648490236	0.00606351999525585	0.443263037390104
ContigAmph44053	21.8364190260331	1.3366981476209	0.486966121538975	2.7449510109584	0.00605199312473413	0.443263037390104
ContigAmph28728	38.8008915485464	1.03376618858651	0.37704962257198	2.74172450176411	0.00611175790581417	0.445529048806911
ContigAmph41142	14.240390198368	1.64395357159355	0.599572164120739	2.74187774211362	0.00610890744817014	0.445529048806911
ContigAmph80162	27.0128177288373	1.27076068930143	0.463663627195238	2.74069522552033	0.00613093476564304	0.44629751046126
ContigAmph82837	23.0558217867814	-1.37702619109349	0.502796915034973	-2.73873237865373	0.00616765562668961	0.448339118719868
ContigAmph16016	68.4021848848818	0.831321488990526	0.303791137410736	2.73649026128945	0.00620984330049191	0.450771827447505
ContigAmph12835	127.883203706573	0.701010061049694	0.256510372289638	2.73287218287668	0.00627846918758544	0.455114167589293
ContigAmph1273	273.612307096822	0.928343304965539	0.339930930754416	2.73097626892983	0.00631470184760063	0.455180123286995
ContigAmph1304	639.641118268766	0.614246537737764	0.224870171909165	2.73156076025008	0.00630351166521873	0.455180123286995
ContigAmph10427	931.547409699067	0.727230378321875	0.266378599868108	2.73006307068942	0.00633222097057792	0.455180123286995
ContigAmph21172	41.7756036343953	1.07758415457174	0.394675674974981	2.73030293706357	0.00632761505699474	0.455180123286995
ContigAmph32770	283.83861686236	0.916449164044604	0.335673032179414	2.73018406660316	0.00632989723030163	0.455180123286995
ContigAmph95706	74.8708279213812	0.843276208833091	0.308656616976045	2.73208530921771	0.0062934842891547	0.455180123286995
ContigAmph26877	71.5359205230128	-1.02511900235456	0.375837684709203	-2.72755778374839	0.00638050813187356	0.457523455646801
ContigAmph80356	12.3173237778662	2.49991567387308	0.916574985162537	2.72745352463418	0.00638252479532047	0.457523455646801
ContigAmph16753	756.053725068524	-0.853802044474524	0.313145618819995	-2.72653357786658	0.00640034401740644	0.458165346531349
ContigAmph95698	107.315872350664	0.740011632143349	0.271603606262361	2.7246016440169	0.00643791105556136	0.460217143839051
ContigAmph75566	38.4953254477375	1.09878108340397	0.403838928556329	2.72083993321786	0.00651162834139253	0.46484392154217
ContigAmph6781	334.046895365247	0.574418622090862	0.211165677812224	2.72022720757516	0.00652370741576156	0.465063853898235
ContigAmph14886	46.3363729549857	1.41287097720331	0.519561859260665	2.71935083767277	0.00654101891459379	0.465297814267216
ContigAmph22392	463.794124133215	0.602959741423442	0.221745682542747	2.71914985901566	0.00654499479475787	0.465297814267216
ContigAmph19819	183.471568068813	0.866755091177359	0.318977000991879	2.71729650878317	0.0065817614431209	0.467268898937171
ContigAmph93072	61.0667926866749	1.40345664009982	0.516633658222007	2.71654124303439	0.00659679754922508	0.467693943119546
ContigAmph18595	69.8074664758404	1.25544564609295	0.462306027518532	2.71561600187577	0.00661525968184059	0.468360385474314
ContigAmph33008	137.93210022519	0.664636620999701	0.24489996336139	2.71391065918177	0.00664940962125489	0.47013418175778
ContigAmph8614	505.774429964603	0.622915227362708	0.229591348547007	2.71314764822321	0.00666474037655911	0.470574373800657
ContigAmph84997	25.5064675528967	1.56002630589034	0.57549080704156	2.71077537086996	0.00671260842353752	0.473307576755952
ContigAmph33218	141.726266445613	0.777799685901697	0.287270154915767	2.70755479673746	0.00677808801976566	0.47727343489587
ContigAmph35469	78.672814163512	-0.898583459797806	0.331943153789538	-2.70704019510381	0.00678860374655356	0.477363532022958
ContigAmph33691	117.789219667398	0.784827212744454	0.290195537322437	2.70447719487991	0.00684119654156812	0.480408154965226
ContigAmph4756	257.988997943891	0.604055077141653	0.22375656380494	2.6996083014049	0.00694211565537216	0.486833521753399
ContigAmph5456	306.174479747152	0.658272740733367	0.243922286917063	2.69869862673593	0.0069611183574131	0.487504662851679
ContigAmph34786	49.2803661855241	1.00253727989339	0.371673888149709	2.69735731203578	0.0069892230676887	0.488590255611751
ContigAmph84670	55.2004013305632	-0.97264307815516	0.360691388914778	-2.69660742686865	0.00700497986627017	0.488590255611751
ContigAmph95303	250.825349169466	0.655119033441023	0.242935514716456	2.69667872235828	0.00700348041416357	0.488590255611751
ContigAmph69044	214.95300565516	0.642671909292273	0.238368043785595	2.69613283343608	0.00701496863438174	0.488627545686504
ContigAmph1035	204.624072848143	0.762409990830608	0.282953158355383	2.69447422061653	0.00704997800281396	0.490405199323603
ContigAmph34127	19.2770284991795	1.45784642982411	0.542091063758132	2.68930171937784	0.00716016697691053	0.497400631766994
ContigAmph95881	25.0710956070696	-1.55166477899082	0.577189277418738	-2.68831185833884	0.00718142921195369	0.498208036765926
ContigAmph26061	128.001403510425	-0.727643173822738	0.27118623531514	-2.68318623538234	0.00729243682961382	0.505230971986274
ContigAmph30949	1109.90429103044	0.50034357086879	0.186527858328877	2.68240666756924	0.00730945446334234	0.505732054194626
ContigAmph13326	413.947318735741	0.5776965889305	0.215413067169527	2.68180847393005	0.00732253692779457	0.505959891144565
ContigAmph92375	19.4532789247511	-1.48421177184649	0.553880714841243	-2.67965959470517	0.00736970626522141	0.508539250482915
ContigAmph44484	13.2023543017399	1.92546674181087	0.718818879123411	2.67865354922084	0.00739188317177308	0.509389453133226
ContigAmph8637	139.660982541254	1.04545230643288	0.390461647585133	2.67747757788412	0.00741788173240765	0.510500398745349
ContigAmph49277	21.3970977567395	1.31290468813341	0.491195105017829	2.67287819996854	0.00752035500842587	0.516864399275907
ContigAmph7959	256.89601788102	0.803371293062054	0.301028762766662	2.66875259918195	0.00761335063640681	0.522560975155444
ContigAmph37027	105.65744065355	-0.924513541545932	0.346790626336407	-2.66591271890118	0.00767796237593547	0.526296826840648
ContigAmph84632	84.3450897747208	0.829418836559237	0.311401585771677	2.66350228918672	0.0077331885715284	0.529380288915065
ContigAmph20343	89.1504732994687	0.866206127114992	0.325269897335896	2.66303809301015	0.00774386471749504	0.529409926003987
ContigAmph29529	45.7128005736245	1.0356275367162	0.388989918073789	2.66235058698808	0.00775970108097975	0.529791797449613
ContigAmph13621	2746.83472179967	0.444735796689283	0.167176133662494	2.66028282235038	0.00780750606237236	0.531651045227474
ContigAmph13989	264.82991383971	0.735546648404368	0.276467961171401	2.66051315779174	0.00780216787252749	0.531651045227474
ContigAmph78333	186.952997121735	0.570035082810321	0.214536930002911	2.65704875520772	0.00788280418519661	0.536072173036449
ContigAmph6794	33.4063627210809	1.04149266341554	0.392209387846869	2.65545062328333	0.00792025276417858	0.537911095747445
ContigAmph25542	40.4559584048766	0.967134232419392	0.364357347066547	2.65435633508099	0.00794598673895533	0.538950628105206
ContigAmph3308	27.1907175391659	1.48469839331292	0.560318654922869	2.64973935861067	0.00805538887788868	0.544940731367537
ContigAmph3367	536.706811207837	-0.817019827628513	0.308289316467284	-2.65017236727766	0.00804507146127515	0.544940731367537
ContigAmph4240	506.364050926154	0.547939856231052	0.206992184567749	2.64715239068222	0.00811727644678138	0.548409563235881
ContigAmph91940	28.3839543928505	1.28857059050453	0.487318365269021	2.64420691346853	0.00818825846145032	0.552482963866317
ContigAmph26631	150.565231006424	-0.612919915239335	0.231888795383924	-2.64316313440053	0.00821354511658907	0.55346657862554
ContigAmph18273	47.5055614168206	0.94011674275721	0.355828900747862	2.64204717711609	0.0082406576421744	0.554570507263205
ContigAmph12972	131.333229518797	2.82227894222133	1.06872668256859	2.64078645013169	0.00827138371146608	0.555914428795075
ContigAmph8914	105.378100614995	0.773465751387853	0.292950762019082	2.64025854057164	0.00828428018847169	0.556058100338923
ContigAmph52410	21.9712659676243	-1.58109387259852	0.59903766642335	-2.63938974328392	0.00830554349549471	0.556762269806937
ContigAmph7223	288.544752505704	0.618991459375022	0.234617303569672	2.63830267400208	0.00833221764482115	0.557702866410622
ContigAmph18362	217.745581488131	-0.556139506206651	0.21082826929977	-2.63787919928278	0.00834262945352715	0.557702866410622
ContigAmph80724	19.4580590182083	-1.34314549149395	0.509249351946506	-2.63750063963761	0.00835194680368822	0.557702866410622
ContigAmph21739	91.814625037679	0.756519211914043	0.287074003602499	2.63527593031923	0.00840689109697059	0.559924947752356
ContigAmph84261	36.9932870387766	1.17147193104511	0.444497881181777	2.63549497228321	0.00840146704165679	0.559924947752356
ContigAmph77	338.148578282293	-0.575411707044674	0.218554927063625	-2.63280135010254	0.00846838613164797	0.563294811876569
ContigAmph4442	143.984495746526	-0.80275782896013	0.305136038371365	-2.63081946414712	0.00851792714013317	0.56586188471805
ContigAmph61187	27.2881427266049	1.44486106030392	0.549357774846795	2.63009122007396	0.00853619598937285	0.566347565487479
ContigAmph18583	163.002997650776	-0.802525718978483	0.305185393724047	-2.62963344734689	0.00854769767480251	0.566383598236529
ContigAmph2858	33.5721314918329	1.08751941407988	0.413753576681239	2.62842299226267	0.00857817753025851	0.567675451310987
ContigAmph19956	79.0308642557164	0.816079464382999	0.310725509566541	2.62636777238348	0.00863015158034124	0.569656135732256
ContigAmph30593	234.471263171165	0.581990759297814	0.221564364673388	2.62673449386023	0.00862085705183888	0.569656135732256
ContigAmph25906	18.284364245293	1.71345134466838	0.652834234649087	2.62463463728951	0.00867419906889121	0.571833296781343
ContigAmph9024	218.954630772443	0.889102132834647	0.33914750746067	2.62157944043788	0.00875233616851529	0.576249353545916
ContigAmph4944	131.859688250546	-0.594548196299862	0.226857840542087	-2.62079633165493	0.00877246528700265	0.576839816658327
ContigAmph12874	21.7930593594741	1.25330982197981	0.478381495498924	2.61989611590784	0.00879565563442658	0.577629816784884
ContigAmph8445	1764.50581918303	-0.63766588093802	0.243450689322267	-2.61928147631536	0.00881152073995725	0.577937357771511
ContigAmph35473	78.3999570005749	-0.90158277132048	0.344288034893867	-2.61868749402927	0.0088268769255678	0.578210782029209
ContigAmph4074	100.618692894079	0.666004561017525	0.25440391804404	2.61790213821405	0.00884721738155553	0.578809598921919
ContigAmph80256	57.9644655804754	-0.843727276533037	0.322495907919768	-2.61624180590516	0.0088903573329005	0.580896622495107
ContigAmph13318	830.8555671496	0.516815672082561	0.197664783725709	2.61460672124441	0.00893302481645933	0.580949000830805
ContigAmph26067	166.063908101603	-0.720732870618246	0.275535964704881	-2.61574880575101	0.00890320294745384	0.580949000830805
ContigAmph35340	51.2956175214232	0.948216923349875	0.362656113334572	2.61464480670449	0.00893202890080636	0.580949000830805
ContigAmph92068	37.1903983616557	0.99061859558031	0.37889577603524	2.61448835863553	0.0089361205723336	0.580949000830805
ContigAmph62902	26.6195954049539	-1.10986009503385	0.424691486847598	-2.61333257059642	0.00896640042881141	0.582185225832524
ContigAmph20648	19.4485045235515	1.353079599619	0.518044961409793	2.61189607160113	0.00900416217300795	0.583903535445098
ContigAmph90095	56.9350225343124	0.838790313900508	0.321334107489177	2.61033701169976	0.00904530636318964	0.585781796230636
ContigAmph95262	58.5274869059001	-0.93914148553616	0.359832510186847	-2.60994062223144	0.00905579396308874	0.585781796230636
ContigAmph63313	76.2230711302404	-0.806822468963208	0.309222853189482	-2.60919418031762	0.00907557266255163	0.586327371864148
ContigAmph7390	70.7168956207908	0.816749881522646	0.313116932747094	2.6084500584398	0.009095328266429	0.586698074059942
ContigAmph35307	22.9028147888804	1.49599852534991	0.573591935657022	2.60812335800418	0.00910401391912533	0.586698074059942
ContigAmph21180	62.0038193238158	1.04052492742415	0.399138450146232	2.60692731317399	0.00913587515907398	0.588018146602216
ContigAmph81312	52.2577652934215	0.863239224016491	0.331264031354622	2.6058948219838	0.00916345953079578	0.5890600029722
ContigAmph1161	54.7027507782053	0.839545815671005	0.32224715883667	2.60528539243546	0.00917977611761242	0.589375837096497
ContigAmph19929	159.107510279013	0.578589839680073	0.222122668189115	2.60482122062149	0.0091922210326253	0.589442620161546
ContigAmph22429	111.661400906715	0.661183903185818	0.253876380842337	2.60435374488983	0.00920476974623185	0.589515885457555
ContigAmph19226	56.9887281011142	0.842503936845698	0.323900890002636	2.60111646139299	0.00929209031021019	0.592173114171274
ContigAmph34415	106.60802998106	0.713591584332529	0.274278084628722	2.6017083548563	0.00927606992269144	0.592173114171274
ContigAmph86258	21.7598445005971	1.5722183677407	0.604272477853656	2.60183679608434	0.00927259674542253	0.592173114171274
ContigAmph93616	269.214653852465	-0.549390347949753	0.211204346844849	-2.60122651904194	0.00928910958568758	0.592173114171274
ContigAmph15007	17.2776557523324	-1.57598857188738	0.606292200484921	-2.59938783746003	0.00933901925763264	0.594161897123856
ContigAmph31624	33.749942993211	1.10905582044167	0.426704233240323	2.59912073526826	0.00934628941958237	0.594161897123856
ContigAmph24933	168.717581434298	-0.722483928401624	0.278139693851994	-2.59755778974172	0.00938893199807157	0.595408050783228
ContigAmph32417	22.5917498965389	1.2411932400192	0.477825848111685	2.59758496725169	0.00938818902099988	0.595408050783228
ContigAmph7130	109.77745902385	-0.646624739530774	0.249025998326319	-2.59661538906251	0.00941472775497099	0.596312241774413
ContigAmph8658	140.029641314784	0.605719092302921	0.233429265429753	2.59487211763173	0.00946261194160452	0.59861154906963
ContigAmph5389	249.897330667223	0.663065820820045	0.255661792146406	2.59352723476309	0.00949970149316725	0.599490319869177
ContigAmph45116	14.8121928714427	-1.65780016555532	0.639188642892219	-2.59360078435383	0.00949766977586828	0.599490319869177
ContigAmph51445	24.7824051050006	1.19778379530208	0.46204746227985	2.59233930079809	0.00953257044278975	0.600830939957494
ContigAmph6427	44.3788713536132	-0.995720352850987	0.384430192504726	-2.59012005889404	0.00959424645813101	0.602802144258333
ContigAmph6930	77.2209896970306	-0.74081671216017	0.285971831814746	-2.59052336539241	0.00958301158947902	0.602802144258333
ContigAmph22939	102.253708875571	-0.676228258886536	0.261096480095105	-2.5899554779146	0.00959883454695086	0.602802144258333
ContigAmph13807	201.851411107163	-0.624030994619599	0.240983199010769	-2.58952075157618	0.00961096299372972	0.602831324475639
ContigAmph92467	62.0151313473709	0.786053728830145	0.30408871109183	2.58494873422897	0.00973934774417093	0.610143574314825
ContigAmph64028	285.968752836624	0.633153179730841	0.24503779872528	2.58390004735837	0.00976901008491451	0.610620997610727
ContigAmph83427	79.9989482456606	3.84963575993824	1.48988706569536	2.5838440030631	0.00977059757418294	0.610620997610727
ContigAmph12624	509.309116603363	0.513129613154063	0.198763199905501	2.5816127602998	0.00983398597415895	0.613422845608742
ContigAmph63071	67.9670479048085	0.793037513357268	0.307208495213308	2.58143093603785	0.00983916761492235	0.613422845608742
ContigAmph10773	279.085078434824	0.488892776594717	0.189424471428146	2.58093778965706	0.00985323358478947	0.613559668188264
ContigAmph82242	11.1017002395083	-1.94626795115898	0.754705919483366	-2.57884283257153	0.00991318778979267	0.615809131884188
ContigAmph90418	56.5355167040922	-0.807148019372453	0.312968728665773	-2.57900533006423	0.00990852578057843	0.615809131884188
ContigAmph32569	17.5246193021115	1.41367342727663	0.548527735727019	2.57721412282453	0.00996002309342242	0.617975790588769
ContigAmph88534	16.3255393662801	1.40859914300724	0.546857057417964	2.57580865767386	0.0100005970839718	0.619749232239805
ContigAmph85297	60.4944151571679	1.0043834274104	0.390132185159228	2.57446954036994	0.0100393925865092	0.621408343043284
ContigAmph63670	479.152695392898	-0.812057684599043	0.315758190367294	-2.57177077071048	0.0101179860042518	0.625523909860944
ContigAmph17939	278.225097991193	0.736943052367214	0.28669533304526	2.57047453315494	0.0101559293578844	0.627031961926752
ContigAmph84838	31.8949713769051	1.27365831764614	0.495565817080583	2.57010930485352	0.0101666431409066	0.627031961926752
ContigAmph22369	331.689908226849	-0.485314247227516	0.188870219770136	-2.56956468742487	0.010182637901499	0.627269913350506
ContigAmph4640	250.765536099352	-0.674890373235405	0.262739422936857	-2.56866809590884	0.010209018522491	0.628146325376699
ContigAmph31596	96.4019828641856	-0.664813965207154	0.259382672155065	-2.56306236528288	0.010375340984622	0.637620836443762
ContigAmph30952	293.736711805581	-0.722551879794647	0.281981746058607	-2.56240657380876	0.0103949550637263	0.638067526738277
ContigAmph28839	53.9951040785924	-0.837864091062915	0.327326950906342	-2.55971617596088	0.0104757679956644	0.642265234979738
ContigAmph56744	105.76001174042	0.694880577183633	0.271648439689492	2.55801424067783	0.0105271781148345	0.644652456975242
ContigAmph18913	74.189564754609	0.907672994593334	0.35512807564753	2.55590322713379	0.0105912569519999	0.647409766369684
ContigAmph23947	37.0128187362925	-1.26849241569626	0.496417212034654	-2.55529499168073	0.0106097839198809	0.647409766369684
ContigAmph25697	557.145266199434	0.61589819174451	0.241009375514637	2.55549474135335	0.0106036963306865	0.647409766369684
ContigAmph23118	70.3904422756419	0.921536246940371	0.360746592127237	2.55452516268079	0.0106332743813726	0.648078010762809
ContigAmph13872	1286.19773996978	0.815169629620672	0.319614779293366	2.5504753923549	0.0107576118054336	0.652577944309893
ContigAmph15593	101.458602454555	0.79992595236506	0.313595921844198	2.55081745853342	0.01074705981717	0.652577944309893
ContigAmph32135	101.416434214523	0.771443979735374	0.30233773851599	2.55159671274241	0.0107230558933423	0.652577944309893
ContigAmph86301	110.600707805579	0.685377270015859	0.268719634953261	2.55052917936223	0.0107559519846554	0.652577944309893
ContigAmph40825	37.4628330068565	0.976594702052527	0.383477141039398	2.54668296369768	0.0108752184960292	0.658938795719546
ContigAmph81554	2422.74611855208	0.800522499607819	0.314626820579335	2.54435555790757	0.0109479580466774	0.662569395415075
ContigAmph4190	41.2943331211861	-0.939067062930018	0.369328909938828	-2.54263080321969	0.0110021412335445	0.665069786566682
ContigAmph26777	237.391272311036	1.80927875451173	0.711856670943722	2.54163348938366	0.0110335804627191	0.66541373703054
ContigAmph83924	21.6960013767859	-1.22651494711141	0.482558964519245	-2.54168928005169	0.0110318196174387	0.66541373703054
ContigAmph1244	10042.7112843977	0.774511000514023	0.305114959615214	2.53842355514385	0.0111353127034493	0.669206397401249
ContigAmph44916	83.1239036770071	0.720088265646658	0.28364441108582	2.53870070236916	0.0111264963469592	0.669206397401249
ContigAmph91979	13.6234262384795	-1.56138948367417	0.615083349927358	-2.53850065012907	0.0111328596048462	0.669206397401249
ContigAmph23644	95.9964010857134	0.799137544416327	0.315079073829441	2.53630790107285	0.0112028187072818	0.6724813961291
ContigAmph42645	14.3576083183022	-1.64389197428917	0.64836704473479	-2.53543419215822	0.0112308027685625	0.673379130267264
ContigAmph1031	431.048953622427	-0.916390092012078	0.361507836791249	-2.53491072322519	0.0112475987002901	0.673604740701964
ContigAmph991	3314.47991612712	-0.698178547862337	0.275572005230613	-2.53356122759301	0.0112910012967297	0.674640590774771
ContigAmph52760	12.2251658921605	1.60255789408635	0.632528998321589	2.53357221303486	0.0112906473824657	0.674640590774771
ContigAmph27119	61.1041722558871	0.807545373681702	0.318972234349308	2.53171055884869	0.0113507644600019	0.677428302945424
ContigAmph6097	417.007358571576	-0.653573665086641	0.258381260386297	-2.5294932926231	0.0114227357282434	0.679370164992557
ContigAmph7079	144.293286208854	0.966113446809652	0.38183689341391	2.53017312751492	0.0114006257131284	0.679370164992557
ContigAmph81644	38.2324883261127	-0.920092864862242	0.363691206234115	-2.52987383002591	0.0114103549677907	0.679370164992557
ContigAmph11143	141.091499928332	-0.580244005477793	0.229446617294061	-2.5288845497955	0.011442565934094	0.679767330733008
ContigAmph7993	149.122110464814	0.613837710783467	0.243036552797167	2.52570119070017	0.0115467645174297	0.683091132557165
ContigAmph22860	453.286131645463	0.457993993574248	0.18134349080459	2.52556069998546	0.0115513824366334	0.683091132557165
ContigAmph23952	160.755384600135	-0.802841835572842	0.317886273683653	-2.52556307722741	0.0115513042832405	0.683091132557165
ContigAmph83841	27.1249726063513	1.32910615784532	0.526119088976859	2.52624583614715	0.0115288775450909	0.683091132557165
ContigAmph89857	117.392486822296	-0.672407494794169	0.266319437906479	-2.52481568780681	0.0115758983303374	0.683758547777324
ContigAmph5145	241.264800887443	-0.613532720131502	0.243102765817375	-2.52375869961267	0.0116107595419443	0.685034812974711
ContigAmph26819	387.123554896402	0.565850074196593	0.2242476625962	2.52332652053329	0.0116250403290475	0.68509530714537
ContigAmph84574	134.331612440509	0.606465744510526	0.240512693929699	2.52155399618032	0.0116837742199806	0.687772422306924
ContigAmph3748	118.713435717103	-0.601043835777133	0.238459125536903	-2.52053191264478	0.0117177612368946	0.688516637855922
ContigAmph5047	49.4827402715908	0.904421772082118	0.358844442922292	2.52037279640407	0.011723060160073	0.688516637855922
ContigAmph7933	1087.63584672529	0.62166632859279	0.246755444832551	2.51936215233125	0.0117567664995024	0.688598854605849
ContigAmph12667	128.353830165476	0.80683251838455	0.320281859945468	2.5191327367773	0.0117644297774353	0.688598854605849
ContigAmph18677	100.39347187586	0.882348288668353	0.350249556973828	2.51919887149004	0.0117622201934898	0.688598854605849
ContigAmph151	363.696362119308	0.472522620639374	0.187784524928715	2.51630223959481	0.0118593434161984	0.691632541622755
ContigAmph27699	29.5784896711195	1.03615734171902	0.411664922573059	2.51699206053955	0.0118361496306691	0.691632541622755
ContigAmph49182	19.5100716712553	1.56936295436411	0.623610315704937	2.51657632152874	0.0118501231636526	0.691632541622755
ContigAmph81836	208.943612602084	-0.629363172223152	0.250145137977414	-2.51599202491786	0.0118697868667167	0.691632541622755
ContigAmph8642	87.8574897927507	0.873635894858655	0.347450167666909	2.5144207030465	0.0119228111598198	0.693939833315458
ContigAmph95977	21.4518884900257	1.45794037752323	0.580073355824787	2.51337242588953	0.0119583019849192	0.695222586938768
ContigAmph10706	1165.93285126149	-0.508944574717789	0.202565927597688	-2.51248855497848	0.0119882993641611	0.696183443075621
ContigAmph81510	293.999263521877	0.702294464170644	0.279694378690462	2.51093521242296	0.0120411793677373	0.698469488711709
ContigAmph626	625.001873467165	-0.499486002815516	0.199150517624772	-2.50808287506749	0.0121388193129849	0.703343875977926
ContigAmph1921	59.8136374442734	0.775547724635556	0.309575206723824	2.50519973108645	0.0122382262404331	0.704124234990554
ContigAmph6718	348.884591577207	0.498977487419544	0.199084234718955	2.50636364111877	0.0121980097006015	0.704124234990554
ContigAmph14713	1047.9766998734	0.441471559252856	0.176172590753584	2.50590376950493	0.0122138856122469	0.704124234990554
ContigAmph29194	41.4126516971029	0.917625247662044	0.366025662138384	2.50699702939166	0.0121761734992821	0.704124234990554
ContigAmph67742	15.5171279879425	-1.73570633099098	0.692878597932957	-2.50506558604791	0.0122428688909005	0.704124234990554
ContigAmph88730	226.861448378609	0.502773515898939	0.200611351049536	2.50620671895476	0.0122034249875081	0.704124234990554
ContigAmph95178	357.957021676112	0.489890144980066	0.195570595650866	2.50492740664666	0.0122476527988644	0.704124234990554
ContigAmph19510	623.549493260775	-0.781107409968004	0.312014533176833	-2.5034327792844	0.0122995042212866	0.704936526733892
ContigAmph24497	9748.75280125743	0.77269889043193	0.308667072892489	2.50334084290574	0.0123027000060748	0.704936526733892
ContigAmph31490	218.787303573778	-0.669567936812829	0.267417404571205	-2.50383081043831	0.0122856768109509	0.704936526733892
ContigAmph4882	814.176534652685	-0.45800462827044	0.183096982350149	-2.50143187720356	0.0123692236582357	0.707180260566651
ContigAmph58610	25.8664001963363	-1.0898937618883	0.435660588286958	-2.50170382906065	0.0123597272575056	0.707180260566651
ContigAmph11082	100.939573637465	0.699102071379513	0.279860323444118	2.49803924606379	0.0124882367226671	0.71319560969539
ContigAmph8572	1023.03131517412	-0.41817065890739	0.167435626269292	-2.49750108877566	0.0125072081055651	0.713490666366475
ContigAmph10090	46.5444498605382	0.940800732785588	0.376855383713894	2.49645029218911	0.0125443248759028	0.714665709644078
ContigAmph24904	29.5151758876	1.08411957720475	0.434319192925628	2.49613554929955	0.0125554613489053	0.714665709644078
ContigAmph405	68.4414368606012	-0.70868510196695	0.284499569091405	-2.49098831407812	0.0127388309608159	0.721132244664633
ContigAmph5099	113.540049058206	0.705435214968669	0.283149472829976	2.49138805705022	0.0127245057473388	0.721132244664633
ContigAmph25750	64.174415950456	-0.782339597132621	0.314023886244032	-2.49133786123727	0.0127263037844333	0.721132244664633
ContigAmph58764	11.9475868373311	1.76737565103858	0.709289144107392	2.49175624034503	0.0127113241239967	0.721132244664633
ContigAmph91328	45.7057343141008	-0.865525716790557	0.347425685285597	-2.49125425507634	0.0127292990947472	0.721132244664633
ContigAmph82291	102.168776898538	0.737096949131472	0.29607599041008	2.48955326674937	0.0127903750683573	0.723257926731922
ContigAmph30087	92.0775426147979	0.672399408073059	0.270396263500426	2.48671856396418	0.0128927347183246	0.72824929090917
ContigAmph87684	196.692780413952	0.694428001887058	0.279413803194788	2.4853031380234	0.0129441157919453	0.7303533630905
ContigAmph7649	1418.25047280854	-0.429200503943818	0.172772173403229	-2.48419925205268	0.012984313363855	0.731025328864361
ContigAmph32164	200.66272528437	-0.576305860318829	0.23198553555762	-2.48423186787733	0.0129831240901811	0.731025328864361
ContigAmph31162	72.3185663437254	-0.813963162795762	0.32786323075942	-2.48263021416096	0.0130416392743575	0.733453845762669
ContigAmph30353	10.4207622874212	1.77044870909403	0.71330888757366	2.48202250096204	0.0130639025772428	0.733907326958932
ContigAmph6653	619.48614743785	-0.546510197643043	0.220258235140515	-2.48122481002536	0.0130931766438514	0.7347532482745
ContigAmph23632	152.284815951291	0.81695928811143	0.329729181287489	2.47766753588948	0.0132244306649024	0.741313963649476
ContigAmph12871	284.862974194997	-0.465027779480979	0.187718943299742	-2.47725547196609	0.0132397096662253	0.741366364451993
ContigAmph43536	16.7133499885713	1.47580674356465	0.596085879425224	2.47582906172462	0.0132927204059463	0.743529179070267
ContigAmph86114	80.620211509285	0.893616632640737	0.361125430831642	2.47453254838025	0.0133410663772636	0.745426675289183
ContigAmph54571	89.1981605092297	-0.651169844835832	0.263198552732487	-2.47406316666823	0.0133586075364482	0.74560072560884
ContigAmph89870	621.511040720075	0.470491853748372	0.190235451608451	2.47320806805638	0.0133906156371388	0.746580990927597
ContigAmph368	94.6140803064447	-0.758515702223546	0.306839745565217	-2.47202558725342	0.0134349899979324	0.747011124795752
ContigAmph1474	198.644590624426	0.560678479468922	0.226858209570559	2.47149301112039	0.0134550181232462	0.747011124795752
ContigAmph51596	59.4604025711594	0.966209015785194	0.390825131658421	2.47222846618179	0.0134273674397934	0.747011124795752
ContigAmph70170	39.6862704890776	1.09324275363101	0.442346381396037	2.4714630877747	0.0134561442068115	0.747011124795752
ContigAmph48220	70.399974481667	-0.769511953832441	0.311469155724961	-2.47058798500083	0.0134891131678694	0.748037902326355
ContigAmph10738	337.424568921124	-0.500862901047806	0.202907177517338	-2.46843363145697	0.0135705814522034	0.75174912301788
ContigAmph4366	148.051351079148	-0.625815942838323	0.253772507331745	-2.46605098959842	0.0136611885649334	0.75514959335831
ContigAmph96282	47.836160136134	0.8330255113224	0.337753074503457	2.46637432552483	0.013648861490264	0.75514959335831
ContigAmph6597	146.650623491102	0.605117789113968	0.245595011567527	2.46388469070183	0.0137440319440182	0.758917251062646
ContigAmph96135	172.669749818943	-0.631463002796522	0.256371004955749	-2.46308276127214	0.0137748115817935	0.759805081956689
ContigAmph9293	267.958698086081	0.603529476234507	0.245390065330416	2.45946988694045	0.01391423699343	0.766677425126264
ContigAmph63712	31.5787856275763	1.12258654207364	0.45671303015107	2.45796915779327	0.013972517323398	0.768250622704787
ContigAmph82431	101.258475305031	0.810308592217009	0.329640383011641	2.45815935782478	0.0139651190620252	0.768250622704787
ContigAmph2763	191.794805124995	-0.523374274920981	0.213009436229648	-2.4570473692852	0.0140084214130344	0.769406219246833
ContigAmph8992	101.389801594155	0.750500615343282	0.305581801636063	2.45597287313955	0.0140503763045968	0.77089134705603
ContigAmph38389	21.2596995461702	1.18503210439587	0.482768032263315	2.4546615044915	0.0141017303851715	0.772888476380917
ContigAmph23057	49.4578174562291	-0.95829986668951	0.390482435034973	-2.45414333836471	0.0141220677327788	0.77318320836964
ContigAmph81078	110.378622822474	0.80507577192225	0.328111559318182	2.45366476449413	0.0141408741231779	0.773393585378121
ContigAmph6069	203.064595190884	0.609466926019726	0.248529858524891	2.45228854849521	0.0141950781275305	0.774718498356163
ContigAmph86693	508.574430849728	-0.623207032993126	0.254105044069564	-2.45255671832518	0.014184501562053	0.774718498356163
ContigAmph15962	248.508975160092	-0.693738797933314	0.282982858619844	-2.45152233360281	0.014225335845542	0.775550904895561
ContigAmph37402	112.806086805316	3.54594177487419	1.44693491986203	2.45065740428209	0.0142595601423251	0.776597583135857
ContigAmph75618	13.0389176185224	1.55780098450747	0.635821377737337	2.45006072310926	0.0142832124780673	0.777066898648873
ContigAmph21550	19.5816113222077	1.25106496815649	0.510942708354853	2.4485425620119	0.0143435482364742	0.779528861255452
ContigAmph13612	158.607550093126	0.715021365401285	0.292256032636829	2.44655810506332	0.0144227547650376	0.781368613497067
ContigAmph16611	234.338803422094	0.566961683181187	0.231678640229747	2.44719013638441	0.0143974864510152	0.781368613497067
ContigAmph89789	276.890501918596	0.579345751259523	0.236770830439014	2.44686285969144	0.0144105659402706	0.781368613497067
ContigAmph29313	19.7561073842916	-1.28969790059536	0.52723397247752	-2.44615857080482	0.014438748125047	0.781415977062751
ContigAmph23209	696.061656661334	-0.422916226330471	0.172972084973695	-2.4449969854661	0.0144853352686764	0.783117225968901
ContigAmph11012	365.818488062797	0.659206159127683	0.269758287398548	2.44369196396088	0.0145378332041	0.78513413931108
ContigAmph10361	70.7526883028699	-0.951141013759471	0.389399170273713	-2.44258613363481	0.0145824493787118	0.786721621805157
ContigAmph5380	362.485603419885	-0.504135463395686	0.206608507627763	-2.44005181192231	0.0146851555414689	0.789789364209448
ContigAmph21776	29.5029480795824	1.06030374006955	0.434529045492326	2.44012166981431	0.0146823159503738	0.789789364209448
ContigAmph34787	95.0478011890876	-0.629336053407026	0.257904230257564	-2.44019282963494	0.0146794239359586	0.789789364209448
ContigAmph12040	778.101647576896	0.454382818734131	0.186600239379495	2.4350602134547	0.0148893117832499	0.799936788155394
ContigAmph20997	83.4981265766432	-0.854983536039679	0.351243024134804	-2.43416517138158	0.0149261822199699	0.800843796775275
ContigAmph24116	263.102297382987	0.534016645999611	0.21940793804921	2.43389847581466	0.0149371840432506	0.800843796775275
ContigAmph6096	355.445236309378	-0.58151253447449	0.238968021238907	-2.43343243777847	0.0149564263660896	0.801044497725363
ContigAmph1343	109.11933545454	0.630144150561406	0.259381824510937	2.42940750281766	0.0151235233620214	0.809155467332
ContigAmph6557	45.2317247659165	0.975687699377447	0.401837787459145	2.42806358642079	0.0151796816434328	0.811320233773713
ContigAmph2652	18.6218297236208	1.26582331509904	0.521581516336425	2.42689450345203	0.0152286834223687	0.812328072743689
ContigAmph5373	691.829221394603	-0.403499282498406	0.166263670785382	-2.42686379166532	0.0152299725734973	0.812328072743689
ContigAmph29059	52.1187860149111	-0.805770467074116	0.332085340849061	-2.4263957722854	0.0152496299438145	0.812538014449596
ContigAmph81790	12.6592816592113	1.5360189957928	0.63315398801142	2.42598013260101	0.0152671060298453	0.812631419203422
ContigAmph50525	37.0337973507672	0.912087804826323	0.376062571881072	2.42536182280529	0.0152931362583776	0.813179479812745
ContigAmph11786	218.004525986318	0.511525161256874	0.211210450757615	2.42187429372943	0.0154406907636022	0.820181563644416
ContigAmph25308	95.5278169516254	0.642557082888906	0.265579886553298	2.41944934621378	0.0155440254574306	0.822290083666167
ContigAmph26450	36507.6902390034	-0.550918566770339	0.227660849918316	-2.41990911906025	0.0155243864561334	0.822290083666167
ContigAmph74800	24.6019429476482	-1.09701260561599	0.453393286656333	-2.41956076082686	0.0155392644238024	0.822290083666167
ContigAmph88726	22.8152279834726	1.17765152539063	0.486678194384736	2.41977458406459	0.0155301308001055	0.822290083666167
ContigAmph5596	2892.31760110787	-0.451146306435945	0.186533344720259	-2.41858262453033	0.0155811065625792	0.822567836139268
ContigAmph63150	21.2053571958548	-1.15243537443734	0.476440025783351	-2.41884667968972	0.0155698012088409	0.822567836139268
ContigAmph13816	545.845195352146	-0.483183106586578	0.19988277811002	-2.41733235426928	0.0156347342112516	0.823716210983004
ContigAmph30757	66.6028883899483	-0.839703410389065	0.347364136027577	-2.41735781935301	0.015633640323318	0.823716210983004
ContigAmph18922	63.3629912164316	0.765450921638101	0.316807826688624	2.41613639927661	0.0156861840184107	0.824856983951895
ContigAmph19132	460.561076689777	0.41780694388638	0.172927100285041	2.4160871442226	0.0156883061532527	0.824856983951895
ContigAmph25830	33.980134561813	-1.01159120775167	0.419205861690742	-2.4131132223956	0.0158169053088858	0.830773306894768
ContigAmph4042	62.7465201358855	0.853850071580527	0.35448214465973	2.40872519094056	0.016008346906271	0.839975026907323
ContigAmph27323	853.203833871773	-0.394116819439502	0.163671837893111	-2.40796965753441	0.0160415141946897	0.840861683203188
ContigAmph13988	104.88406109662	0.907321734352304	0.377394476905695	2.40417332492926	0.0162090860571074	0.846212529066203
ContigAmph17274	3342.27990010869	0.657317191813863	0.273313429779836	2.40499412101102	0.0161727259562951	0.846212529066203
ContigAmph19220	11.6029857758862	1.98608510368549	0.826037162133192	2.40435321161162	0.016201111191216	0.846212529066203
ContigAmph88610	23.8890627033127	1.14810352120928	0.477420074054244	2.40480780680125	0.0161809731161366	0.846212529066203
ContigAmph546	205.179013911461	0.572794820265478	0.238341380624778	2.4032537646798	0.0162499065804896	0.847487559743715
ContigAmph8105	17468.8656083893	-0.392150043914096	0.163238584507011	-2.40231220515915	0.0162917972598446	0.848815775784081
ContigAmph29246	27.350434592983	1.02465460165965	0.426690263454777	2.40140141320157	0.0163324093272988	0.850074767041404
ContigAmph7369	147.138463114734	0.574650466426115	0.239355904255218	2.4008201018237	0.0163583763877008	0.850569743684032
ContigAmph48857	33.4668546911503	1.01741611960866	0.423899152565315	2.40013718699732	0.0163889283838963	0.851301884013362
ContigAmph25093	75.1930834807753	1.01694242707942	0.424187855903856	2.3973869428971	0.0165124758439235	0.855141083684709
ContigAmph29115	49.4082064990855	-0.780743214045319	0.325626810417174	-2.39766256668202	0.0165000573969638	0.855141083684709
ContigAmph61554	53.7771490933437	-0.831823425320942	0.34693752284269	-2.39761735342219	0.0165020939534028	0.855141083684709
ContigAmph203	207.644313245446	0.509837104073339	0.212751197138454	2.39640063572262	0.0165569819663865	0.856199165038295
ContigAmph4881	724.108683785691	-0.447387883098027	0.186764305122926	-2.39546782134607	0.0165991711819591	0.856199165038295
ContigAmph5115	28.4254060611371	1.09939537876468	0.458833608303106	2.39606549927881	0.0165721286250371	0.856199165038295
ContigAmph37769	18.7830389293096	1.59282233711634	0.664830339459524	2.39583280512022	0.0165826525102434	0.856199165038295
ContigAmph8712	23.4181584999023	1.28415042731389	0.536506701117753	2.39354033162773	0.016686646639187	0.859853085642815
ContigAmph2329	137.919914149717	0.553803764243578	0.231523569375377	2.39199734928791	0.0167569633980542	0.862013608690089
ContigAmph13645	738.952829209926	-0.643328746151491	0.268962677116014	-2.39188854397816	0.0167619316758289	0.862013608690089
ContigAmph35470	49.2073244031602	-0.822839087350965	0.34407396551003	-2.39145988895512	0.0167815175452429	0.862162974958582
ContigAmph19886	80.2184727083043	0.711174964544266	0.297493368645261	2.39055736866622	0.0168228206984813	0.86257010414713
ContigAmph84138	49.261128593539	-0.799080242922558	0.33423038317065	-2.39080671045567	0.0168114008497745	0.86257010414713
ContigAmph26421	77.1167962011225	0.687606237282875	0.287854703108081	2.38872677728909	0.0169068704612304	0.864655187025419
ContigAmph30446	12.998412917388	-1.45756689525588	0.610238440002837	-2.38852028929725	0.0169163742422707	0.864655187025419
ContigAmph56622	106.998300159201	0.740357253375838	0.309983257670385	2.3883781948091	0.0169229169820625	0.864655187025419
ContigAmph73137	29.3641834045397	1.13080574519526	0.473493988745644	2.38821563118664	0.0169304049467867	0.864655187025419
ContigAmph38606	10.8227996478019	1.74405025546574	0.7306987141908	2.3868254064155	0.0169945599853172	0.86707486503567
ContigAmph2558	234.567968304601	-0.482044042927793	0.202022855496331	-2.38608667194365	0.0170287372651064	0.867961791725603
ContigAmph3636	480.522453088287	0.534798868727048	0.224175323059619	2.38562773737954	0.0170500000642365	0.868189362876846
ContigAmph96552	26.8487130829856	-1.26738874592336	0.531478953357919	-2.38464522050387	0.0170955991808679	0.869654476440924
ContigAmph844	53.8817938058046	-0.739234278870377	0.310452864977619	-2.381148194344	0.0172587672697661	0.87505393874352
ContigAmph6277	372.186668998466	-0.419900157189543	0.176426133527394	-2.3800337784104	0.0173110511385338	0.87505393874352
ContigAmph9031	228.444080905553	0.567156729592449	0.238222244538604	2.38078828738658	0.0172756374796374	0.87505393874352
ContigAmph13222	533.899929938933	-0.534894922778535	0.224612800026356	-2.38140890775491	0.0172465556656921	0.87505393874352
ContigAmph20701	170.319373070001	0.576507870577238	0.242290640196338	2.37940627879835	0.0173405519588226	0.87505393874352
ContigAmph25289	176.226780465068	-0.757520685468515	0.318269315932883	-2.38012477969526	0.017306776525468	0.87505393874352
ContigAmph80676	14.8513235780465	1.6755239938183	0.703771514180592	2.38077836351352	0.0172761028541938	0.87505393874352
ContigAmph81649	15.164551371628	-1.87369985036801	0.787560700846614	-2.37911801382905	0.0173541190157903	0.87505393874352
ContigAmph91411	61.5148921457129	-0.744640855709491	0.31292902817681	-2.37958383103007	0.0173322001751948	0.87505393874352
ContigAmph75505	85.6192429436774	0.716657768006101	0.301300788391855	2.37854594351096	0.0173810708090953	0.875558736547059
ContigAmph20971	341.229680000068	-0.47244299157651	0.19874191971912	-2.37716830069976	0.0174461259985826	0.877980113058172
ContigAmph4584	186.630985655304	-0.546826165466524	0.230070262771239	-2.37677898429767	0.0174645489862417	0.878052285802448
ContigAmph90720	22.3063128250671	-1.18778224857308	0.499846945566911	-2.37629190116574	0.0174876224487656	0.878199843413185
ContigAmph92438	26.2886957088282	-1.65568215306776	0.696835951096133	-2.37599990422903	0.0175014673538345	0.878199843413185
ContigAmph79794	13.5911003300692	-1.46711524144993	0.617734060711919	-2.3749948962813	0.017549192843137	0.878888064830126
ContigAmph89526	15.3387216394191	1.60850620136572	0.677218168273436	2.37516693544504	0.0175410150189641	0.878888064830126
ContigAmph7534	4200.25633740219	0.606072265454446	0.255237755133836	2.37454002499217	0.0175708311008673	0.879119878622677
ContigAmph80182	38.0232215971982	-0.873759438724891	0.368306274863979	-2.3723718501608	0.0176742930612043	0.882587596691095
ContigAmph87163	29.8462938046747	-1.00584549677175	0.423956769994426	-2.37251901127791	0.017667253907067	0.882587596691095
ContigAmph31	443.070798129166	0.439593743140168	0.185384847175027	2.37124959153288	0.0177280549273434	0.884417751800015
ContigAmph75501	117.554585551092	0.64581394701809	0.272448358910898	2.37040865138519	0.0177684340914237	0.88557738435983
ContigAmph88091	157.726976666287	-0.50759367312731	0.214396566991999	-2.36754571329611	0.0179065077716828	0.891599178874428
ContigAmph77902	18.6303624045195	1.26428400910392	0.534321455799315	2.36614868331016	0.0179742242813368	0.893249815150589
ContigAmph93161	89.1678784761607	0.647832388782839	0.273784511899923	2.36621269876523	0.0179711164422522	0.893249815150589
ContigAmph10024	37.218315058024	-0.925753090113428	0.391507078555447	-2.36458838376358	0.0180501198320715	0.896159839962327
ContigAmph15147	245.097269061389	0.650034737059348	0.275018638805928	2.36360248120513	0.0180982203406726	0.896824947351221
ContigAmph89012	31.5186460509564	-1.11428365789212	0.471381441207396	-2.36386832506175	0.0180852392301496	0.896824947351221
ContigAmph82308	145.858958143309	-0.64112670770523	0.271340993421806	-2.36280813901416	0.0181370565654141	0.89788853594527
ContigAmph62268	15.3017571359764	1.45775212782419	0.617211974757009	2.36183383901146	0.0181847907532916	0.899390167744615
ContigAmph40531	28.0890780379996	1.0213509910547	0.432534673310146	2.36131587610861	0.0182102122315689	0.899786433055837
ContigAmph36885	11.989455479845	1.56850747841665	0.664545271485146	2.36027182152888	0.0182615487368626	0.90066725784646
ContigAmph58563	26.7328650256555	1.06517991461451	0.451300656971573	2.3602445468667	0.0182628915374795	0.90066725784646
ContigAmph22902	100.905528253247	0.885285951969115	0.375198084197793	2.35951618426287	0.018298782663714	0.901577009715343
ContigAmph25790	126.575941766309	0.58114094669035	0.246344967197826	2.3590534578434	0.0183216162434394	0.901657445909804
ContigAmph61533	77.5655476811328	0.80726855828128	0.342240410719009	2.35877626661708	0.0183353063936848	0.901657445909804
ContigAmph9939	953.701120083467	-0.397600112564039	0.168853354899024	-2.3547066198466	0.018537334769349	0.91072586522722
ContigAmph3785	156.559861248948	0.575805654408396	0.244683421102794	2.35326795666509	0.0186092185442735	0.913389222452262
ContigAmph6944	158.249048590564	0.542698238489186	0.230695409582489	2.3524448946399	0.0186504529772063	0.914544603106194
ContigAmph19367	693.380354100497	0.472845127441175	0.201091256198398	2.35139576120935	0.0187031291929173	0.916258321522973
ContigAmph17774	240.968441390276	-0.748958710263711	0.318613768339914	-2.35067904995456	0.0187391895222102	0.917155559910904
ContigAmph78958	151.835378132668	0.920919280327642	0.391924089130125	2.34973890574479	0.0187865837750056	0.918605294065649
ContigAmph17426	37.75176369892	0.85030268428972	0.362005165334616	2.34886892706006	0.0188305342334488	0.919015421455681
ContigAmph27540	399.630670288843	0.438484050201119	0.186665386096954	2.34903781236319	0.0188219952882172	0.919015421455681
ContigAmph22697	523.789965267526	0.709450503580316	0.302413999582479	2.34595787417184	0.0189782523020567	0.924012821377058
ContigAmph35099	89.0092943657901	-0.865013010075786	0.368650413668764	-2.34643168162293	0.0189541406613823	0.924012821377058
ContigAmph54345	21.9987713069536	1.17783156560029	0.502103440891298	2.34579465042002	0.0189865648228163	0.924012821377058
ContigAmph15200	40.2237453745102	0.860309102560343	0.366808676591646	2.34538918368633	0.0190072278668013	0.924148226780584
ContigAmph19872	330.875314241021	0.6365734698899	0.271508444011074	2.34458074484024	0.0190484855174553	0.925283764552784
ContigAmph26133	90.4197132891413	0.618955277918415	0.264049751975021	2.3440858144679	0.0190737822824297	0.925642594821688
ContigAmph6517	62.7378238794558	0.74690750123136	0.318895083920819	2.34217314374409	0.0191718185299504	0.929527456756057
ContigAmph34604	59.7858626227655	0.735291801156413	0.314113005753827	2.34085118313333	0.0192398343681515	0.931950889862738
ContigAmph14701	509.262083621647	0.446571611313843	0.190853783368409	2.33986250328513	0.0192908404215366	0.933304018829034
ContigAmph33214	206.154105641644	-0.719079685877865	0.307350233716332	-2.33961001813175	0.0193038850732961	0.933304018829034
ContigAmph15022	45.4125137410003	-0.94375149850514	0.403553798148313	-2.33860145248415	0.0193560695706889	0.934079458161986
ContigAmph83874	49.436753074207	0.893144982392937	0.381897732672766	2.33870197694586	0.0193508627792166	0.934079458161986
ContigAmph12491	374.643539736098	0.526060084076467	0.225071095696347	2.33730627404151	0.0194232645535089	0.936274416942386
ContigAmph85598	278.023760289274	-0.576807619246077	0.24681256962302	-2.33702691936269	0.0194377844086986	0.936274416942386
ContigAmph75608	15.0775605299218	1.37270019315025	0.587563440546377	2.33625868871925	0.0194777631947708	0.937326548378525
ContigAmph21231	23.0352838561556	-1.22799550478543	0.525719787819054	-2.33583656776506	0.0194997609698179	0.937512228803784
ContigAmph48321	119.897721596977	0.598513770612217	0.256328658022637	2.33494676416307	0.0195462019584054	0.938563025374263
ContigAmph54946	130.349584557485	-0.542206254737836	0.232235872915862	-2.33472222844003	0.0195579362728907	0.938563025374263
ContigAmph72932	14.5069071954638	1.38487358770934	0.593280298184285	2.33426525699184	0.0195818367657633	0.938838266606409
ContigAmph95085	13.6304911970063	-1.37719931774819	0.590814356633359	-2.33101870712129	0.0197523732781576	0.94613684940528
ContigAmph31722	38.7328905552244	0.962091765303281	0.412899766379817	2.33008551624675	0.0198016317808852	0.946557571512114
ContigAmph46554	40.1097781320897	0.935201017793378	0.401406247971037	2.32981181165087	0.0198160996125708	0.946557571512114
ContigAmph54392	16.3331099096486	-1.33846524533028	0.574411539871123	-2.33015034069578	0.0197982065574718	0.946557571512114
ContigAmph86314	80.6860761782053	0.708482028456861	0.304204717816504	2.32896463125933	0.0198609394819694	0.947823449848666
ContigAmph37602	46.8979965423113	0.850859258061132	0.365396132276053	2.32859404603198	0.0198805817842518	0.947885598650617
ContigAmph24383	25.5089733808133	1.02508203760354	0.44039235012975	2.3276563212361	0.0199303602206071	0.949383168333507
ContigAmph17325	216.223550376126	0.71605285633995	0.307742741033426	2.32679040270904	0.0199764234645984	0.950701169746135
ContigAmph13963	1733.24864987976	-0.380597636829375	0.16374659719987	-2.3243086777847	0.020108956054661	0.956128136825296
ContigAmph12722	24.3834495301708	1.04133469165918	0.448115205949673	2.32381021182337	0.0201356681867167	0.956518267060906
ContigAmph16821	223.55918152733	-0.609520053852587	0.262333727154737	-2.32345287990005	0.0201548361824114	0.95654963567654
ContigAmph12797	43.9711817047256	-0.856791867654709	0.368909139520188	-2.32250106020434	0.0202059713991701	0.958096720912576
ContigAmph11022	277.800662551239	0.604823779272686	0.26066494124928	2.32031118712769	0.0203240493721368	0.96281225274933
ContigAmph37744	42.5170118986207	1.12786096334344	0.486638423729982	2.31765702900857	0.0204679681469091	0.967855869812306
ContigAmph90216	55.8870808887895	-0.751589868305754	0.324276212332798	-2.31774592067337	0.020463133747207	0.967855869812306
ContigAmph21622	25.9415750870955	1.13640352865549	0.490597500077662	2.3163663257061	0.020538275749546	0.970292727458442
ContigAmph40559	34.444877659105	1.07982833163934	0.466266536666236	2.31590355885289	0.020563534976714	0.9705988509009
ContigAmph25631	75.0677038041963	-0.781369374865985	0.337459053020181	-2.31544943859976	0.0205883485769422	0.970883401323612
ContigAmph27995	13.4291803571154	-1.37020582624871	0.592295424567582	-2.31338242609093	0.0207016224430381	0.975335145256137
ContigAmph12240	390.064144788294	-0.858225459955254	0.371285293740476	-2.31149866268375	0.0208053269443841	0.97932834043128
ContigAmph6032	425.129570361662	0.444519763302576	0.192337511857436	2.31114439928942	0.0208248802772016	0.979356790033566
ContigAmph91506	226.608762551939	0.630191232252725	0.272723857904828	2.31073011761458	0.0208477665957482	0.979541789758773
ContigAmph90057	129.530725738212	0.542198396831675	0.234958611915731	2.30763363986052	0.0210195218356853	0.986714774346556
ContigAmph26429	68.7184830780705	0.990766964654333	0.429416408290557	2.30724058402526	0.0210414117793648	0.986846031220226
ContigAmph5891	484.072999769086	0.471100909093808	0.204265817114098	2.30631299817855	0.0210931493678623	0.988375640914412
ContigAmph37100	15.2483203063579	-1.30338500964227	0.565291802742683	-2.30568531742102	0.0211282221134432	0.989122311332606
ContigAmph44533	21.8934997673696	1.62739628416292	0.706125126329921	2.30468542115374	0.0211841979761405	0.990845328686739
ContigAmph50063	40.3348789543087	-0.856631413223243	0.371874421142907	-2.30355024309147	0.0212479036854872	0.99292645034423
ContigAmph50466	34.4587761581464	0.972703934750982	0.422369270466169	2.30297041656797	0.0212805076403413	0.993551722568564
ContigAmph5591	903.162359934793	0.430453731827341	0.18702577414352	2.30157438887016	0.0213591858322053	0.995426655141298
ContigAmph10442	718.75142121051	0.531651193614387	0.230973914712636	2.30178024334841	0.0213475682585256	0.995426655141298
ContigAmph64586	13.4592266126904	1.42652639260483	0.620066870841869	2.30060088626897	0.0214142009026548	0.997091495002534
ContigAmph1	250.651816706149	0.138591535852584	0.264236165106137	0.524498740726558	0.599931695446245	0.999936646849144
ContigAmph2	200.405961556759	0.010231470060648	0.249013569343566	0.0410880021021329	0.967225739462912	0.999936646849144
ContigAmph11	89.9099170871709	-0.012798845333974	0.274482583986597	-0.0466289887980616	0.962808927433281	0.999936646849144
ContigAmph12	18.3031319882615	-0.32805534237725	0.516023359238097	-0.635737387667142	0.524947603303588	0.999936646849144
ContigAmph13	56.1084919045397	-0.220819720565863	0.31797572866656	-0.694454641213898	0.487397137022058	0.999936646849144
ContigAmph15	2394.0669408257	0.215618714474322	0.202028995775628	1.067266179523	0.285851655641658	0.999936646849144
ContigAmph16	112.031386836027	0.292160366952068	0.249793226636894	1.16960884362473	0.242158416783595	0.999936646849144
ContigAmph17	611.989494281181	0.160881202889404	0.173409742236506	0.927751813793629	0.353536324583139	0.999936646849144
ContigAmph18	514.773620948535	0.0599542200235652	0.174202635470217	0.344163679623638	0.730723195144218	0.999936646849144
ContigAmph19	1419.07220282089	0.412475921017249	0.185687377491612	2.22134604187558	0.0263275326476632	0.999936646849144
ContigAmph20	195.378025062148	0.115980675034096	0.220348720295091	0.526350572305457	0.598644651336868	0.999936646849144
ContigAmph24	938.298009440075	-0.19717421756582	0.157819127720741	-1.24936831430672	0.211530392072952	0.999936646849144
ContigAmph25	340.463197574279	-0.37255481723054	0.340824792811943	-1.09309775898875	0.274350879835997	0.999936646849144
ContigAmph26	782.247858812253	-0.14165526394845	0.203664918972317	-0.695530996026391	0.486722593262089	0.999936646849144
ContigAmph27	202.830857233179	-0.075249723232334	0.290478784776256	-0.25905411057918	0.795593490851541	0.999936646849144
ContigAmph28	544.410974185671	-0.278335492721607	0.343675418213223	-0.809878967104136	0.418009741332535	0.999936646849144
ContigAmph29	97.8513137901059	0.0760892481827708	0.290984066637882	0.261489397209713	0.793715124970963	0.999936646849144
ContigAmph30	428.830083279233	0.10333911194717	0.195412664644033	0.528825048956853	0.596926819502974	0.999936646849144
ContigAmph32	39.3871932747664	0.444258667905677	0.370336825823317	1.19960705208838	0.230291986435358	0.999936646849144
ContigAmph33	51.3122125802412	0.073932471865836	0.413173368708149	0.178938134606781	0.85798627891031	0.999936646849144
ContigAmph34	277.472453514756	0.0392719471624047	0.209418566451413	0.187528488174978	0.851246289537259	0.999936646849144
ContigAmph35	76.0871728672166	0.183190708915853	0.333208792243829	0.549777536427675	0.582471967940772	0.999936646849144
ContigAmph36	155.789520499866	-0.149829785155983	0.218667332061142	-0.685195103190304	0.493220813477467	0.999936646849144
ContigAmph37	502.446620900034	0.0457678119807324	0.245133169799317	0.18670591180378	0.851891220661991	0.999936646849144
ContigAmph38	686.501130648196	-0.188413039383272	0.160657740730066	-1.17276041930554	0.240891894703086	0.999936646849144
ContigAmph39	72.0728971928425	0.399883572130954	0.292877296645771	1.36536213872052	0.172139257552797	0.999936646849144
ContigAmph40	397.78541129255	-0.12779685230004	0.198329799759357	-0.644365357374948	0.519338543266582	0.999936646849144
ContigAmph41	25.2901598463567	-0.591083223035755	0.476783326506825	-1.23973132065325	0.215074788359944	0.999936646849144
ContigAmph42	459.949095083513	0.0708674687887434	0.198486983778983	0.357038368156449	0.721063082535055	0.999936646849144
ContigAmph43	299.316982898653	0.083187219790746	0.184491674683425	0.45089958630106	0.652061921703694	0.999936646849144
ContigAmph44	577.086759583461	0.0552613128218824	0.221907616158262	0.249028464090528	0.80333876368664	0.999936646849144
ContigAmph46	1389.17271554771	-0.096840949203056	0.153341966038936	-0.631535852217171	0.5276902147959	0.999936646849144
ContigAmph47	570.526808015441	-0.107132768908295	0.168246159956276	-0.636762045185087	0.524279852218221	0.999936646849144
ContigAmph48	267.178194230314	-0.257839887464901	0.369254699366952	-0.698271106385214	0.485007665179484	0.999936646849144
ContigAmph49	357.017869132017	0.18578948634053	0.217372099664772	0.854707143313479	0.392713294970511	0.999936646849144
ContigAmph50	53.9385809966321	-0.53822999870496	0.318381577625493	-1.69051866228916	0.0909287709773437	0.999936646849144
ContigAmph51	47.5341393446576	0.0740888027082936	0.343963641580349	0.215397192470375	0.829457658721555	0.999936646849144
ContigAmph52	381.990655016857	-0.18257955077165	0.213758274534591	-0.854140272086189	0.393027272327928	0.999936646849144
ContigAmph53	163.857414250954	0.513891888612297	0.245860994529582	2.09017249602992	0.0366023072563815	0.999936646849144
ContigAmph54	96.4988069791833	0.248640255625945	0.269512701540294	0.922554871087485	0.356239222887246	0.999936646849144
ContigAmph55	87.6376013655523	0.154918543293517	0.28036832020386	0.552553666480126	0.580569076473813	0.999936646849144
ContigAmph56	431.873451193814	-0.114118219622541	0.20442458777406	-0.558241162989016	0.576679715999585	0.999936646849144
ContigAmph57	128.313036198245	-0.091973862757242	0.282020720144785	-0.326124487271801	0.744330170797854	0.999936646849144
ContigAmph58	112.384913647075	-0.204205485444565	0.301337202486211	-0.677664369881145	0.497984522450172	0.999936646849144
ContigAmph59	209.407553330015	0.232678716482918	0.207725028093357	1.12012846318329	0.262659022941895	0.999936646849144
ContigAmph60	720.353140998349	-0.201150834788508	0.24908435807092	-0.807561086317734	0.419343295711844	0.999936646849144
ContigAmph61	16.0196861453268	-0.00480984834681905	0.692390051046293	-0.00694673232168881	0.99445735411119	0.999936646849144
ContigAmph63	78.611012108747	0.0814813614704196	0.270152413450826	0.301612561700291	0.762947430861815	0.999936646849144
ContigAmph64	72.6237162092916	0.0886369570216824	0.277126785738457	0.319842619274396	0.749087637755571	0.999936646849144
ContigAmph65	96.5717613966018	-0.0743010016473788	0.263490707660673	-0.281987180143995	0.777953340347767	0.999936646849144
ContigAmph66	60.2515567256067	-0.0471672862302171	0.324883631036206	-0.145182095139046	0.884567102159349	0.999936646849144
ContigAmph67	167.007912491374	0.227242068617864	0.222669021151569	1.02053742115829	0.307473651146908	0.999936646849144
ContigAmph68	335.571905332361	-0.0670140426195363	0.191981080367409	-0.349065868841276	0.727039859561691	0.999936646849144
ContigAmph69	105.848058993914	0.26104490860741	0.246926382184105	1.05717706750662	0.290430783824953	0.999936646849144
ContigAmph70	165.00336881574	-0.213493083364478	0.383033687985096	-0.557374168542545	0.577271810647946	0.999936646849144
ContigAmph71	122.756451148023	-0.150146735408997	0.249806512368192	-0.601052126245991	0.547805268203573	0.999936646849144
ContigAmph72	13.683987457268	-0.0987025053492192	0.572280696081177	-0.172472190701359	0.86306632234139	0.999936646849144
ContigAmph73	259.457525671669	0.123139260980112	0.210351657715036	0.585397150266005	0.558280704478659	0.999936646849144
ContigAmph74	219.014361908049	-0.0891168980780669	0.21042756530078	-0.423503916659803	0.671927641562055	0.999936646849144
ContigAmph75	81.1327789898958	-0.371905784326686	0.299795674437085	-1.24053085497314	0.214779109018186	0.999936646849144
ContigAmph76	375.300880825547	-0.284839138499152	0.189770939793888	-1.50096289141276	0.133365159853467	0.999936646849144
ContigAmph78	331.006361602424	-0.166758630566997	0.220181895876784	-0.757367584210086	0.448829670998893	0.999936646849144
ContigAmph79	149.663826710119	-0.082618137724535	0.26316787226395	-0.313937020555728	0.753568872394264	0.999936646849144
ContigAmph80	237.440008413563	-0.0904952805947618	0.215607398019531	-0.419722520776232	0.674688171111883	0.999936646849144
ContigAmph81	188.550275919144	0.0871723816118528	0.233195731955563	0.373816368253532	0.708540940827383	0.999936646849144
ContigAmph82	94.6294071551164	0.189537825237079	0.31059516136821	0.610240753275553	0.54170233723937	0.999936646849144
ContigAmph83	471.385693973776	-0.0100622662126103	0.246186953471114	-0.0408724592052395	0.967397573464373	0.999936646849144
ContigAmph84	488.277189170735	0.0812824051002914	0.175441018841574	0.463303312058913	0.643146972079015	0.999936646849144
ContigAmph85	512.810897622247	0.240030946619996	0.166971896512377	1.43755297528289	0.150560931628038	0.999936646849144
ContigAmph86	363.761087198686	-0.180188721581957	0.187735582359306	-0.959800583978242	0.337155588367217	0.999936646849144
ContigAmph87	151.577950698846	0.101696044727156	0.219703455438777	0.46287867673294	0.643451332547623	0.999936646849144
ContigAmph88	475.89506704868	-0.0788677288779005	0.195826826879336	-0.402742209199443	0.6871378790845	0.999936646849144
ContigAmph89	530.419054175153	0.161836911661026	0.181881434602302	0.889793463609385	0.373576796973978	0.999936646849144
ContigAmph90	135.64841112481	-0.0630938285987392	0.233772550609055	-0.269894084803194	0.787241738011823	0.999936646849144
ContigAmph91	1908.34065142147	-0.042121905793913	0.152217568985152	-0.276721708766889	0.781993801376016	0.999936646849144
ContigAmph92	298.813167851956	0.223726806451892	0.195541089338532	1.14414217087931	0.252564681139046	0.999936646849144
ContigAmph93	657.865161993314	-0.0420758614125779	0.179239194730157	-0.23474698977488	0.814405114047731	0.999936646849144
ContigAmph94	499.132500713791	-0.184674776302308	0.186807369369091	-0.98858399926092	0.322866717968595	0.999936646849144
ContigAmph95	394.602564446828	-0.131015360179454	0.177244791496651	-0.739177490481743	0.459799227335983	0.999936646849144
ContigAmph96	312.537604462134	-0.00858945480543822	0.194701378144338	-0.0441160452345161	0.96481190298872	0.999936646849144
ContigAmph97	12.8106317282707	0.269394070645018	0.591763015572675	0.45523978950309	0.64893673783233	0.999936646849144
ContigAmph98	708.504654596333	-0.0369588277150641	0.197725565440588	-0.186919823102842	0.851723496529618	0.999936646849144
ContigAmph99	1120.45829585847	-0.131035236450089	0.160756040898983	-0.815118584143472	0.415004434891083	0.999936646849144
ContigAmph100	159.8488512242	0.426402251936275	0.227900377320374	1.8710028344396	0.0613446881458967	0.999936646849144
ContigAmph101	125.079884830403	-0.399314617072622	0.2943372019277	-1.35665697185878	0.174890230299913	0.999936646849144
ContigAmph102	240.810846701831	0.127868801235848	0.202286788136824	0.632116424476318	0.527310803520842	0.999936646849144
ContigAmph103	46.490441579443	0.149948383676523	0.329204357188469	0.4554872388602	0.648758746185078	0.999936646849144
ContigAmph104	127.710069829965	0.35391559514933	0.264360600283162	1.33876074865257	0.180648572674869	0.999936646849144
ContigAmph105	103.206589673349	0.0230300644249772	0.264874204978219	0.0869471771585724	0.930713499532561	0.999936646849144
ContigAmph106	100.888994053377	-0.064946448809148	0.299507990945393	-0.216843793062567	0.82833008191032	0.999936646849144
ContigAmph107	1218.37390630382	0.118010441457845	0.177930263015121	0.663239852839516	0.50717695125504	0.999936646849144
ContigAmph108	302.530537317024	0.0132889946796069	0.236344705695767	0.056227173105003	0.955160834392091	0.999936646849144
ContigAmph109	1411.07627340926	-0.0569235375600154	0.153554629836417	-0.370705446137681	0.710856933488654	0.999936646849144
ContigAmph110	220.57809376106	-0.192030279962591	0.225465592951352	-0.851705475096706	0.394377581046966	0.999936646849144
ContigAmph111	44.420131870063	0.00710180576055447	0.384162455390861	0.0184864649340312	0.985250775139854	0.999936646849144
ContigAmph112	288.554054207187	0.147523103251775	0.2037642494312	0.723989137758855	0.469072403721093	0.999936646849144
ContigAmph113	988.835398796513	-0.10419149254066	0.15839687876875	-0.657787535654497	0.510674664753414	0.999936646849144
ContigAmph114	239.792743042231	-0.0129912557231321	0.203008557492773	-0.0639936359510093	0.948975294198212	0.999936646849144
ContigAmph115	438.048547365967	0.214049366538582	0.17048382373761	1.25554062459335	0.209282570275046	0.999936646849144
ContigAmph116	336.012832631437	-0.0586512875640112	0.270957404468744	-0.216459438261178	0.828629639225307	0.999936646849144
ContigAmph117	248.786390906559	-0.130969699860647	0.197402912683292	-0.663463867277234	0.507033513481836	0.999936646849144
ContigAmph118	568.74898068467	-0.151414174351699	0.219532799272735	-0.689710944575487	0.490375981826984	0.999936646849144
ContigAmph119	644.516656651538	0.178122462312653	0.195327438131492	0.911917260660244	0.361812274521971	0.999936646849144
ContigAmph120	2811.53118830693	0.0473257718303999	0.144210568894156	0.328171313609717	0.742782136265236	0.999936646849144
ContigAmph121	184.296326277065	-0.0288977908500119	0.214722074943404	-0.134582300667636	0.892942136300655	0.999936646849144
ContigAmph122	190.645832152284	0.113453343154446	0.409366867454279	0.277143443141786	0.781669964963974	0.999936646849144
ContigAmph123	155.183275067253	0.138666030101372	0.238648580196966	0.581046951911155	0.561208809869219	0.999936646849144
ContigAmph124	1090.18276129568	-0.259102552092712	0.186935369139212	-1.38605419234364	0.165730356359171	0.999936646849144
ContigAmph125	290.957740820827	-0.16786446131609	0.225030534116009	-0.745963039973732	0.455689742142343	0.999936646849144
ContigAmph126	455.708817693087	-0.352689197988993	0.215337318966419	-1.63784521736334	0.101453986288989	0.999936646849144
ContigAmph127	412.546554352848	-0.104597432858594	0.195142240785435	-0.536006107327641	0.59195432954888	0.999936646849144
ContigAmph128	618.600097297591	-0.093463329977285	0.177163991846372	-0.527552630775738	0.597809877890136	0.999936646849144
ContigAmph129	801.144677882761	-0.0593038335076382	0.195872834183015	-0.302767015931506	0.76206742176311	0.999936646849144
ContigAmph130	822.209652881795	0.415045786284578	0.19782227602038	2.0980740624065	0.0358986034105175	0.999936646849144
ContigAmph131	91.2413886836271	-0.152751000502055	0.276950837181006	-0.551545545255822	0.581259753930947	0.999936646849144
ContigAmph132	175.974580433833	-0.065216630359333	0.229075930295233	-0.284694381794202	0.775878295291292	0.999936646849144
ContigAmph133	167.774609794035	-0.321361156577557	0.214437860321859	-1.49862135396806	0.133971889772063	0.999936646849144
ContigAmph134	240.626591324176	-0.0661654591731977	0.226989699843862	-0.291491020159552	0.770675810728175	0.999936646849144
ContigAmph135	613.618658672548	-0.0458593148666963	0.164655519137306	-0.278516718461494	0.780615733080927	0.999936646849144
ContigAmph136	387.678501038526	-0.00284167118882532	0.179867555873965	-0.0157986868449834	0.987394996052635	0.999936646849144
ContigAmph137	93.8774370202584	-0.00633934947718767	0.251487388166154	-0.0252074250061373	0.979889514540816	0.999936646849144
ContigAmph138	85.5522752551623	0.359433858302849	0.283013732235738	1.27002267862909	0.204076551964161	0.999936646849144
ContigAmph139	180.276972603093	0.031281743240653	0.23996943269516	0.130357199620466	0.896283827333952	0.999936646849144
ContigAmph140	112.739654585013	0.225137169477583	0.240709513115711	0.935306488569723	0.349630372361292	0.999936646849144
ContigAmph141	63.3013191090478	0.140048605813812	0.310179365748795	0.451508453748123	0.651623133568634	0.999936646849144
ContigAmph142	16.1219575426755	0.982002959193135	0.553937901510747	1.77276722989153	0.0762672856286885	0.999936646849144
ContigAmph143	561.036396265582	0.069539769178851	0.171013352326061	0.406633565350286	0.684277140898676	0.999936646849144
ContigAmph144	593.217821940804	-0.00156735216553454	0.171104294843301	-0.00916021521826752	0.992691307915358	0.999936646849144
ContigAmph145	181.964235146122	0.191232872063991	0.213032099089641	0.89767163202726	0.36936063750183	0.999936646849144
ContigAmph146	199.317667506043	0.484339772238937	0.217769832673856	2.22409029888134	0.0261423694664649	0.999936646849144
ContigAmph147	336.920847587838	-0.276774374564811	0.217701184951151	-1.27134987633124	0.203604205905486	0.999936646849144
ContigAmph148	21.4083552925085	-0.338451543127578	0.49927973723704	-0.677879589106765	0.497848042409617	0.999936646849144
ContigAmph149	218.835758024172	0.0180289698307154	0.208057869535641	0.0866536308910297	0.930946834898209	0.999936646849144
ContigAmph150	22.2622780623223	0.224060618131727	0.457523687608987	0.48972462890974	0.6243287713757	0.999936646849144
ContigAmph152	293.785883109897	-0.435392993197245	0.206912297261192	-2.10423932729158	0.0353575755865424	0.999936646849144
ContigAmph153	417.123569535325	0.0448063699503879	0.190794569533171	0.234840907998683	0.814332215479992	0.999936646849144
ContigAmph154	42.2384443683234	-0.766139351764299	1.07872192188765	-0.710228777425452	0.477562278115267	0.999936646849144
ContigAmph155	27.3561125891661	0.222987002902624	0.459071668079356	0.485734621427516	0.627155333438374	0.999936646849144
ContigAmph156	4323.80219834047	-0.0489758433574754	0.216325804190841	-0.226398526706825	0.820891473703947	0.999936646849144
ContigAmph157	60.2094431376352	-0.309267891422212	0.300015372339971	-1.0308401499899	0.302615786684482	0.999936646849144
ContigAmph158	56.4347587278994	-0.032687300869868	0.318646652299407	-0.102581654738849	0.918295003415418	0.999936646849144
ContigAmph159	118.450233295369	0.322892377773174	0.261388415588355	1.23529719955791	0.216719915602287	0.999936646849144
ContigAmph160	88.5423758728943	0.0661606491157927	0.395061077363799	0.167469419051038	0.867000707759902	0.999936646849144
ContigAmph161	47.0478624311858	-0.00754689785088713	0.371011402271543	-0.0203414175539639	0.983771016183177	0.999936646849144
ContigAmph162	121.854147080448	0.0119964654507667	0.244320678504939	0.049101310311416	0.96083855919127	0.999936646849144
ContigAmph163	227.765917442146	0.0321704124332587	0.216881275770604	0.148331903337222	0.882080838622207	0.999936646849144
ContigAmph164	361.329249128169	-0.179612507768034	0.238108728806853	-0.754329791553886	0.450651217770718	0.999936646849144
ContigAmph165	446.079853825937	0.156298021096115	0.169708638926834	0.920978578842406	0.357061610943933	0.999936646849144
ContigAmph166	337.881347014589	0.0415600608971066	0.182848912410584	0.227291813493449	0.820196838425107	0.999936646849144
ContigAmph167	134.699165366427	-0.0407886430410316	0.222314065690153	-0.183473065073086	0.854426850992675	0.999936646849144
ContigAmph168	296.16206755843	0.118057637540415	0.199076422565295	0.593026718177505	0.553163271583077	0.999936646849144
ContigAmph169	629.224021333894	-0.0382187327416165	0.223691941983499	-0.1708543115265	0.864338322444335	0.999936646849144
ContigAmph170	400.414777028332	0.055007845778488	0.188702084848355	0.291506295877406	0.770664129449899	0.999936646849144
ContigAmph171	692.395971278298	-0.0780763637444811	0.171687228720923	-0.454759298790907	0.649282414636276	0.999936646849144
ContigAmph172	1250.08479120824	-0.0404414085857479	0.153126726937855	-0.264104179554237	0.791699643386129	0.999936646849144
ContigAmph173	461.778878579893	0.0605168717486779	0.208752261643461	0.289898041210388	0.771894240200564	0.999936646849144
ContigAmph174	936.531019307562	-0.034679203826922	0.156334837029186	-0.221826462264759	0.824448978701565	0.999936646849144
ContigAmph175	581.871788959634	-0.21203304086571	0.192284877752809	-1.10270263238427	0.270156323257243	0.999936646849144
ContigAmph176	151.712034722615	-0.334017452008511	0.225595934059636	-1.48060049663933	0.138713062964089	0.999936646849144
ContigAmph177	313225.735916621	-0.0979125450870262	0.244859405452245	-0.399872510129581	0.689250420598367	0.999936646849144
ContigAmph178	379.294563750848	0.100012260480058	0.191500135057107	0.522256866556428	0.601491496887271	0.999936646849144
ContigAmph179	5819.5679405575	0.362285462186906	0.208825325911587	1.73487320374297	0.0827632663718633	0.999936646849144
ContigAmph180	109.608515681799	0.117056800893162	0.27222159028223	0.430005572929766	0.667191587295073	0.999936646849144
ContigAmph181	1384.26996948755	0.30317123088178	0.179470921580866	1.68924986962402	0.0911715557703818	0.999936646849144
ContigAmph182	594.732515624462	-0.0602390588905875	0.175248091136901	-0.343735891785147	0.731044916327916	0.999936646849144
ContigAmph183	640.823406776438	0.0209785496572429	0.197332734711813	0.106310540356522	0.915335968989465	0.999936646849144
ContigAmph184	535.039387534411	-0.0368667668960578	0.166230904760385	-0.221780462238353	0.824484789598468	0.999936646849144
ContigAmph185	2135.4677756271	-0.143554299197254	0.162411152961129	-0.883894342106001	0.376753251754036	0.999936646849144
ContigAmph186	1693.68313015727	0.317373674261792	0.161955248196297	1.95963809630375	0.0500381052889497	0.999936646849144
ContigAmph187	1241.43675577915	-0.00139812448706131	0.232923434989444	-0.00600250673413206	0.995210721310426	0.999936646849144
ContigAmph188	487.550061954363	-0.13988272880054	0.198503508997591	-0.70468642850156	0.481005398960042	0.999936646849144
ContigAmph189	278.663379986778	-0.30759466932337	0.202584635222513	-1.51835142376675	0.128925830479206	0.999936646849144
ContigAmph190	2028.53429486577	-0.0647194831484954	0.157817795948768	-0.410089893597963	0.681740006113316	0.999936646849144
ContigAmph191	6736.30411420261	-0.0392689581296346	0.1979017312617	-0.198426551800633	0.842711345103595	0.999936646849144
ContigAmph192	87.2940189628687	-0.217366431885789	0.274460297027484	-0.791977689450734	0.428373685281007	0.999936646849144
ContigAmph193	1024.88067767582	0.320519781995975	0.158334269881737	2.02432349127816	0.0429368781089729	0.999936646849144
ContigAmph194	41.6677062030959	-0.0943216094179105	0.363852353551606	-0.259230450201094	0.795457438045378	0.999936646849144
ContigAmph195	699.779298293212	0.025263756963341	0.169731426869671	0.148845487422549	0.881675556630032	0.999936646849144
ContigAmph196	833.809716903469	0.0243979892596282	0.262214585139856	0.0930458892918375	0.925867104940879	0.999936646849144
ContigAmph197	359.762626206325	0.0180851497134032	0.237750787826624	0.0760676752271855	0.939365257037494	0.999936646849144
ContigAmph198	2669.82781801391	-0.0145879872104654	0.199842340159617	-0.0729974799074798	0.941808122904786	0.999936646849144
ContigAmph199	139.271488223843	0.305833526399412	0.248834331226859	1.22906483559372	0.219047498079324	0.999936646849144
ContigAmph200	1672.4728155859	-0.0723691198274908	0.177374391402062	-0.408002075471248	0.683272151167235	0.999936646849144
ContigAmph201	2167.56316210689	-0.0619553823385664	0.156048507808623	-0.397026432412593	0.691347968883864	0.999936646849144
ContigAmph202	181.736107484042	-0.108681330506678	0.278666826587188	-0.390004550730672	0.696533181868796	0.999936646849144
ContigAmph204	127.615413821655	-0.108785549291457	0.253179758980822	-0.429677118460711	0.667430530306647	0.999936646849144
ContigAmph205	189.10326377686	-0.113224071318591	0.209988961443486	-0.539190586687397	0.589755354939821	0.999936646849144
ContigAmph206	23.8977505618882	-0.0954336624214207	0.545188787062686	-0.175047001490234	0.861042701844699	0.999936646849144
ContigAmph207	48.7369544320563	-0.00767422060935412	0.33973094379712	-0.0225891127949093	0.981978028344363	0.999936646849144
ContigAmph208	164.87644481961	-0.109332902176742	0.221409410387462	-0.493804224424842	0.621444449441183	0.999936646849144
ContigAmph209	17.1579203752643	-0.578159480187867	0.824788326570562	-0.700979222865378	0.483315981702505	0.999936646849144
ContigAmph210	102.560088033407	-0.40168949828674	0.255436272673749	-1.57256247940867	0.115820161335711	0.999936646849144
ContigAmph211	208.535748689995	0.255640016120939	0.206213185890635	1.23968802003048	0.215090809925013	0.999936646849144
ContigAmph212	357.594858720208	-0.00541801741553025	0.180763526642155	-0.0299729570238797	0.976088620646102	0.999936646849144
ContigAmph213	1146.94678463779	0.453666645637184	0.259453953394534	1.74854396975529	0.0803698787745089	0.999936646849144
ContigAmph214	25.0655998181837	-0.225500084238368	0.50389371208016	-0.447515177967721	0.654503131490425	0.999936646849144
ContigAmph215	34.0000091153645	0.704795955905691	0.429939841342105	1.63928970552157	0.101152938971597	0.999936646849144
ContigAmph216	1228.26042351007	-0.262753837368872	0.18066782732611	-1.45434769022043	0.145849934764493	0.999936646849144
ContigAmph217	24837.0127250425	0.0760518156087935	0.160526879741554	0.473763744310211	0.63566839130792	0.999936646849144
ContigAmph218	48.914854102071	-0.0136637933787682	0.418643233810263	-0.0326382759238881	0.973963046305925	0.999936646849144
ContigAmph219	142.983453207213	-0.0420922889393454	0.222888589250108	-0.188849007842715	0.850211160159433	0.999936646849144
ContigAmph220	27.2747969453972	-0.242767015865782	0.419564620797914	-0.578616508236789	0.562847963269333	0.999936646849144
ContigAmph221	55.2730441209911	-0.196418926398475	0.318532437125298	-0.616637125471814	0.537474101161288	0.999936646849144
ContigAmph222	53.4635282999138	0.127833295990766	0.338693851786414	0.377430222947712	0.70585391018136	0.999936646849144
ContigAmph223	143.662017887752	-0.152198162316539	0.240977579337419	-0.631586402083613	0.527657174291265	0.999936646849144
ContigAmph224	52.6389539646731	-0.448883215123255	0.367922955013336	-1.22004677611644	0.22244714321596	0.999936646849144
ContigAmph225	34.3813502972658	-0.460833387315545	0.379508753017034	-1.21428921902853	0.224637301053826	0.999936646849144
ContigAmph226	62.0006848009996	0.0519542906843664	0.330410353705659	0.157241715042166	0.875054353342409	0.999936646849144
ContigAmph227	50.5678562690369	-0.0152119575269843	0.400520228179843	-0.0379804975047447	0.969703231544343	0.999936646849144
ContigAmph228	47.7919738347828	0.5143428420178	0.394522047830389	1.30371127506396	0.192332043649846	0.999936646849144
ContigAmph229	889.624626279741	0.0109453968277981	0.276728669603267	0.0395528112193436	0.968449649165085	0.999936646849144
ContigAmph230	199.345239433773	0.001093683468954	0.206129427086988	0.00530580948295393	0.995766596393856	0.999936646849144
ContigAmph231	68.5344223942722	0.175715873663258	0.29713014063769	0.591376806426109	0.554267977225519	0.999936646849144
ContigAmph232	117.454690246556	-0.0556305439068098	0.247759750172547	-0.224534226677526	0.822341637669347	0.999936646849144
ContigAmph233	57.1085164355761	0.370446684385776	0.405969149006513	0.912499595824787	0.361505782200498	0.999936646849144
ContigAmph234	296.709719060752	0.198954546495158	0.18994562254253	1.04742896325821	0.294901779296064	0.999936646849144
ContigAmph235	272.899092766886	0.0680023449154416	0.197779573699706	0.34382895889285	0.730974920454424	0.999936646849144
ContigAmph236	145.117032877141	0.0909732000219719	0.323446517561764	0.281261955478003	0.778509488055055	0.999936646849144
ContigAmph237	39.5887178451318	-0.14902407860462	0.540788543728734	-0.275568113142892	0.782879803690946	0.999936646849144
ContigAmph238	84.2362832512696	0.0331470455010479	0.272426721573951	0.121673253304742	0.903157796594024	0.999936646849144
ContigAmph239	123.910007386271	0.0194541252548526	0.233890824519304	0.0831760942090613	0.933711520917995	0.999936646849144
ContigAmph240	463.644853385832	0.130684308068723	0.169522285728771	0.77089751065422	0.440767682773425	0.999936646849144
ContigAmph241	584.815428070327	-0.0474424315053542	0.185781995426196	-0.255366142432254	0.798440318482174	0.999936646849144
ContigAmph242	381.206017314576	-0.0398387689362063	0.197729874956524	-0.201480777474653	0.840322658590279	0.999936646849144
ContigAmph243	132.678746613611	-0.21833851755062	0.22670987739776	-0.963074569386969	0.335510102782604	0.999936646849144
ContigAmph244	38.3411179141406	0.072414965191464	0.369892254892659	0.195773131861002	0.844787740780153	0.999936646849144
ContigAmph245	506.971931978516	-0.285632279362687	0.172098773564243	-1.65969967970784	0.0969748838498553	0.999936646849144
ContigAmph246	200.802102317836	-0.35808150943516	0.243565259461888	-1.47016660022153	0.141516638150176	0.999936646849144
ContigAmph247	73.6190290539269	0.175102026129304	0.281256018844724	0.622571658549906	0.533566040351715	0.999936646849144
ContigAmph248	252.449783324585	0.0689852883430064	0.227380818629825	0.303390975363292	0.761591922397936	0.999936646849144
ContigAmph249	377.761358629153	-0.168142872743661	0.217774427419427	-0.772096497904333	0.440057276281171	0.999936646849144
ContigAmph250	559.71570459308	0.115856375573698	0.20633422205876	0.561498593969079	0.574457688548887	0.999936646849144
ContigAmph251	899.695489436897	-0.271489478274909	0.198065643786238	-1.3707045456501	0.17046707722833	0.999936646849144
ContigAmph252	2300.20868527872	-0.0138906315775676	0.165870283266899	-0.0837439431824952	0.933260018224645	0.999936646849144
ContigAmph253	2143.3657827606	0.126548724908206	0.179705992372028	0.704198692752687	0.481309045018807	0.999936646849144
ContigAmph254	2189.57639674791	-0.0803896965615036	0.149568233318506	-0.537478412212797	0.590937192792641	0.999936646849144
ContigAmph255	3750.47851681885	-0.195419801281656	0.14550270523835	-1.3430664465072	0.179250459138762	0.999936646849144
ContigAmph256	343.136872912221	0.369946809469416	0.315688374923592	1.17187340065644	0.241247887749426	0.999936646849144
ContigAmph257	1141.16240738767	0.0320823840419532	0.212511296079441	0.150967899748539	0.880001037919679	0.999936646849144
ContigAmph258	107.680289589952	0.195718283122313	0.249982343655671	0.782928427104826	0.433669143096741	0.999936646849144
ContigAmph259	2742.8594882524	0.0326293402335477	0.15602899194467	0.209123572657052	0.834351773203571	0.999936646849144
ContigAmph261	1015.4461448775	-0.039641066514261	0.156061196127535	-0.254009757056237	0.79948802022572	0.999936646849144
ContigAmph262	99.3376545338134	-0.142737194424266	0.284893476506034	-0.501019525525159	0.616357381344919	0.999936646849144
ContigAmph263	1241.09974348851	-0.00336348945758644	0.222300773706775	-0.0151303542560902	0.987928184536675	0.999936646849144
ContigAmph264	4086.26409100618	-0.0619379708240891	0.228832218815437	-0.270669799666824	0.786645006389273	0.999936646849144
ContigAmph265	1765.57403798052	-0.0528968901069748	0.160483691123192	-0.329609131848605	0.741695321663521	0.999936646849144
ContigAmph266	279.659814814713	-0.121868416474175	0.217537170056117	-0.560218818893056	0.575330192319692	0.999936646849144
ContigAmph267	501.418241404785	0.494928816790865	0.225108064223894	2.19862766132894	0.0279044084371128	0.999936646849144
ContigAmph268	1058.66401700387	-0.110818288946201	0.173519935805506	-0.638648743337561	0.52305146418667	0.999936646849144
ContigAmph269	1780.53341456798	-0.0132349929338962	0.236189639679783	-0.0560354508006351	0.955313565861486	0.999936646849144
ContigAmph270	37.1324482270955	-0.426748152949216	0.638089667555829	-0.668790257306397	0.50362928246704	0.999936646849144
ContigAmph271	1230.19010672595	-0.2887822254729	0.179243860527421	-1.61111362265443	0.107154959719831	0.999936646849144
ContigAmph272	1254.50113714866	-0.121927262173861	0.178851484570779	-0.681723511920915	0.495413797393407	0.999936646849144
ContigAmph273	2534.09563380723	0.0831830908640639	0.164083577266171	0.506955615241904	0.612185961633343	0.999936646849144
ContigAmph274	496.398653015916	0.0161415904975498	0.203214997733456	0.0794310984798555	0.936689733768508	0.999936646849144
ContigAmph275	479.441715867862	-0.128678182570607	0.206469402856834	-0.623231242935462	0.533132573448531	0.999936646849144
ContigAmph276	940.409822917473	-0.164006525559242	0.181052815924617	-0.905849073496474	0.365015742545114	0.999936646849144
ContigAmph277	9731.24054582291	0.00255369055108927	0.157061101713873	0.0162592171022808	0.987027593274735	0.999936646849144
ContigAmph278	3306.69263472746	-0.0473965533857835	0.183645127994917	-0.258087725513172	0.796339204386496	0.999936646849144
ContigAmph279	433.008567382431	0.238960747710666	0.219702281070419	1.08765710827588	0.276746509434104	0.999936646849144
ContigAmph280	5336.47646336417	0.0403045088261139	0.171548289117516	0.234945559838863	0.814250987459782	0.999936646849144
ContigAmph281	2238.90532880978	0.00118360215626716	0.176429298373266	0.0067086485474938	0.994647313050606	0.999936646849144
ContigAmph282	702.416922003397	-0.15276531971198	0.179543126963541	-0.850855848929273	0.394849433202179	0.999936646849144
ContigAmph283	280.230675794394	0.223713233260295	0.190619671577567	1.17361042230766	0.240551104678388	0.999936646849144
ContigAmph284	234.534059995056	0.127026591592599	0.268125963888387	0.473757146642749	0.635673096658767	0.999936646849144
ContigAmph285	565.379128708959	-0.0453862346805192	0.233125301646275	-0.194686009455054	0.845638765177426	0.999936646849144
ContigAmph286	1146.3640377934	-0.0398098802161562	0.173663973549702	-0.229235110785731	0.818686184591259	0.999936646849144
ContigAmph287	423.342786573638	0.00235252737192144	0.194459982306483	0.0120977454796519	0.990347631107963	0.999936646849144
ContigAmph288	1104.48986132177	0.0982637726399263	0.169422537100305	0.579992333497817	0.561919787790174	0.999936646849144
ContigAmph289	101.841972432645	0.156995289737902	0.358574017064819	0.437832308718346	0.661507848300998	0.999936646849144
ContigAmph290	1749.50914705532	-0.185960893411818	0.220938027220442	-0.841688032392336	0.39996259879984	0.999936646849144
ContigAmph291	10449.565701012	-0.100774299706046	0.144153800071743	-0.699074874584591	0.484505239575029	0.999936646849144
ContigAmph292	7485.00081588117	0.0493913435632003	0.219295983743954	0.225226849666653	0.821802802980536	0.999936646849144
ContigAmph293	1161.40076660177	-0.0387803767152558	0.151913863053926	-0.255278721346778	0.798507833521716	0.999936646849144
ContigAmph294	374.16465334274	0.0469450463366312	0.190185829879509	0.246837771070394	0.805033777661588	0.999936646849144
ContigAmph295	82.2338008033077	-0.0137164428585628	0.293213559083523	-0.046779701803134	0.962688806934178	0.999936646849144
ContigAmph296	786.004017906355	-0.0675966484378297	0.173783631142325	-0.388970169362323	0.697298213532153	0.999936646849144
ContigAmph297	8523.09607422008	-0.0627757805456313	0.229203201673345	-0.273887014174863	0.784171451337218	0.999936646849144
ContigAmph298	927.409169498815	-0.0149696377741385	0.156026422217036	-0.0959429663349932	0.92356586975787	0.999936646849144
ContigAmph299	412.181577351211	-0.0601503276041208	0.294631337491943	-0.204154548243754	0.838232728514793	0.999936646849144
ContigAmph300	4821.86331484929	-0.00473357649436249	0.15920741268752	-0.029732136302304	0.976280682182059	0.999936646849144
ContigAmph301	1192.03260124746	0.00376575003366523	0.186342380621524	0.020208768510443	0.983876833055127	0.999936646849144
ContigAmph302	3318.53282532777	0.00949502312648448	0.153674834631902	0.0617864541662137	0.950732890885943	0.999936646849144
ContigAmph303	988.23477422349	-0.14113260265183	0.206964410169695	-0.681917255899756	0.495291273419113	0.999936646849144
ContigAmph304	7422.50522533608	0.0107187206642044	0.196562174134875	0.0545309427481685	0.956512156509676	0.999936646849144
ContigAmph305	2917.60275615422	0.0110319284249439	0.191217909371052	0.0576929664236458	0.953993196346759	0.999936646849144
ContigAmph306	159.59775541921	-0.205621331214234	0.250876429676598	-0.819611995751449	0.412437332993369	0.999936646849144
ContigAmph307	811.058626012091	0.025983699387079	0.210967975584131	0.123164187906411	0.901977083518436	0.999936646849144
ContigAmph308	228.29324954402	-0.01337923219814	0.277051528236038	-0.0482914939445538	0.961483933495229	0.999936646849144
ContigAmph309	2635.04077348019	-0.0642629560305931	0.156119866449121	-0.411625743041078	0.680613759972518	0.999936646849144
ContigAmph310	25058.3526120703	0.272757161540739	0.187324930132009	1.45606439756057	0.145374818345083	0.999936646849144
ContigAmph311	352.176218136079	0.0196762483846962	0.210749328747915	0.0933632790272449	0.925614962148389	0.999936646849144
ContigAmph312	186.997601305199	0.0157568214329016	0.261380002194517	0.0602831942023458	0.95193008668474	0.999936646849144
ContigAmph314	7148.06332955326	-0.100287447807661	0.203942063767258	-0.491744792394131	0.622899768828935	0.999936646849144
ContigAmph315	3660.42894063404	-0.0762270222218234	0.242597259927178	-0.314212214287601	0.753359866481765	0.999936646849144
ContigAmph316	3660.05685138286	-0.138520505090352	0.217763878868742	-0.636104140916068	0.524708546711599	0.999936646849144
ContigAmph317	6325.15589862922	-0.110810986498497	0.145847951751915	-0.759770604711572	0.447391716670908	0.999936646849144
ContigAmph318	625.065217239339	0.0715011643929145	0.194834144400818	0.366984773704862	0.713630375646279	0.999936646849144
ContigAmph319	149.542568496262	-0.150489226786355	0.2944587949479	-0.511070578866498	0.609301636492788	0.999936646849144
ContigAmph320	740.043731635185	0.142080890742554	0.159558365114634	0.890463440387327	0.373217090853905	0.999936646849144
ContigAmph321	422.280121575238	-0.0273643791019525	0.269192473543739	-0.101653581698325	0.919031647642951	0.999936646849144
ContigAmph322	772.269016253525	-0.0713316146190851	0.195433086740765	-0.364992518967395	0.715116990597741	0.999936646849144
ContigAmph323	2270.48588521175	-0.176703815736786	0.190318610309905	-0.928463146347328	0.353167376128733	0.999936646849144
ContigAmph324	135.123588780163	0.11875147547833	0.250101509068198	0.474813110567632	0.634920187394637	0.999936646849144
ContigAmph325	60.4949574726562	0.135215062918894	0.376116688792889	0.359502959979932	0.719218863874989	0.999936646849144
ContigAmph327	40.3092636247548	0.411002334336782	0.373336783536817	1.10088893583734	0.270944998030345	0.999936646849144
ContigAmph328	49.7037755315063	0.333278581594585	0.335443893432752	0.993544935887764	0.320444463273421	0.999936646849144
ContigAmph329	77.6307032632543	0.558173980343033	0.286560300525028	1.94784127222215	0.0514339586476694	0.999936646849144
ContigAmph330	41.1959430229857	0.295196745067152	0.368877698905656	0.800256415453978	0.423562249622867	0.999936646849144
ContigAmph331	12.7809901998675	-0.00384540799407815	0.572796719318646	-0.00671339039555316	0.994643529688448	0.999936646849144
ContigAmph332	102.120597256634	0.424862369328378	0.255203883926887	1.66479585965117	0.0959534902597058	0.999936646849144
ContigAmph333	185.922926222719	0.00480192024223917	0.214341629351123	0.0224031153293741	0.982126395303083	0.999936646849144
ContigAmph334	267.545198414979	-0.210131360576561	0.203594059446711	-1.03210948859517	0.302020829311592	0.999936646849144
ContigAmph335	99.4359584605074	0.0204273473486087	0.28438223058882	0.0718306038542331	0.942736717366186	0.999936646849144
ContigAmph336	248.527199786214	0.155325654175362	0.22618107922382	0.686731422046393	0.492251992081302	0.999936646849144
ContigAmph337	78.2658720725509	-0.0114825506042022	0.2813165408717	-0.0408171896633659	0.967441635408914	0.999936646849144
ContigAmph338	433.691172393597	0.121028929431049	0.18792455541802	0.644029350830879	0.51955640141709	0.999936646849144
ContigAmph340	203.074100497811	0.085862041305231	0.217185768017223	0.395339170191033	0.692592595240132	0.999936646849144
ContigAmph341	489.782359219664	-0.0450797418014838	0.221067111763145	-0.203918807469576	0.838416947640386	0.999936646849144
ContigAmph342	472.386400587919	0.15393290293589	0.178697582384525	0.861415699540096	0.389009132379991	0.999936646849144
ContigAmph343	156.651613616507	-0.386150910262894	0.216888422213998	-1.78041274089721	0.0750084381663152	0.999936646849144
ContigAmph344	85.7979425912805	0.0256187692913786	0.272233431007091	0.0941058899217683	0.925025041666809	0.999936646849144
ContigAmph345	224.742121185677	0.0248859850116347	0.210953107447146	0.117969274369991	0.906092003349049	0.999936646849144
ContigAmph346	402.569746906119	0.00741161623705159	0.217653885615112	0.0340523038038379	0.972835442456225	0.999936646849144
ContigAmph347	44.4601205207649	-0.322102085780777	0.369670061704968	-0.871323158535478	0.383577729049171	0.999936646849144
ContigAmph348	59.4845545955506	-0.0914717666768264	0.297602787094068	-0.307361928864979	0.758567902901709	0.999936646849144
ContigAmph349	281.123856931546	0.189054188741941	0.186224488029869	1.0151951053377	0.310012833341437	0.999936646849144
ContigAmph350	230.633299808087	-0.364994069931987	0.256374790147119	-1.42367379305328	0.154540923418895	0.999936646849144
ContigAmph351	463.536689732912	-0.235287380092524	0.18096945176711	-1.30014970921896	0.193549663248063	0.999936646849144
ContigAmph352	203.885337749957	-0.177506811076816	0.226478776975791	-0.783767969109927	0.433176271864661	0.999936646849144
ContigAmph353	317.38734230559	0.0381705069454384	0.18873226344227	0.202246856203863	0.839723743959896	0.999936646849144
ContigAmph354	23.8135819018238	0.0440631320443585	0.447331299442709	0.0985022333542342	0.921533498625444	0.999936646849144
ContigAmph355	135.745726817017	-0.425395075095409	0.225573659836385	-1.88583665044917	0.0593169703858337	0.999936646849144
ContigAmph356	245.3847683274	0.03431552164946	0.207538555999925	0.165345284803236	0.868672217188626	0.999936646849144
ContigAmph357	83.0687690564247	0.0273655204192385	0.293365154808803	0.0932814274997098	0.925679986450752	0.999936646849144
ContigAmph358	249.222442426926	-0.236464074783989	0.213360468741075	-1.10828437985366	0.267739019223356	0.999936646849144
ContigAmph359	319.06897950269	-0.0796068246620737	0.217388369423667	-0.366196337334535	0.714218575050523	0.999936646849144
ContigAmph360	1278.65641507961	-0.13730182413701	0.173677092383983	-0.790558053755581	0.429201932562225	0.999936646849144
ContigAmph361	290.096942569348	0.0628749673811739	0.194291753171685	0.323611096996046	0.746232485520907	0.999936646849144
ContigAmph362	183.66661375283	0.128183200372616	0.283213660724653	0.452602462906049	0.6508350249723	0.999936646849144
ContigAmph363	852.085801627791	0.361943354542721	0.218694603825927	1.65501730820398	0.0979209870427959	0.999936646849144
ContigAmph364	61.8350806309288	0.229332760495221	0.304177315891482	0.753944322978501	0.450882654601543	0.999936646849144
ContigAmph365	180.521905747439	-0.219804609456586	0.226435018134734	-0.970718271702113	0.331688590511234	0.999936646849144
ContigAmph366	380.981543882818	-0.0724328404574213	0.211376901512354	-0.342671502605916	0.731845603712767	0.999936646849144
ContigAmph367	47.856535660495	-0.171081424404754	0.347844260965352	-0.491833396733243	0.622837125247752	0.999936646849144
ContigAmph369	307.717416036788	0.170487458901054	0.189199808535453	0.901097417702234	0.367536525796597	0.999936646849144
ContigAmph370	24.3471257387038	0.241145285876007	0.457783657104698	0.526766917371311	0.598355459290446	0.999936646849144
ContigAmph371	25.8330122800138	-0.106180068691913	0.432234360358254	-0.245653928586119	0.805950139084074	0.999936646849144
ContigAmph372	143.052626119401	0.0500434026092193	0.252483507024197	0.198204639974457	0.842884957330493	0.999936646849144
ContigAmph373	369.403310182067	0.103433810610023	0.201845906458817	0.512439476354339	0.608343468685307	0.999936646849144
ContigAmph374	87.9076101819059	0.0807117005439219	0.303009100792737	0.266367248814517	0.789956385992098	0.999936646849144
ContigAmph375	51.5013720339671	0.0018283558338781	0.319660310318593	0.00571968359805397	0.995436377647433	0.999936646849144
ContigAmph376	1433.72173074344	0.137674804862217	0.174002125287154	0.791224846449512	0.428812794891083	0.999936646849144
ContigAmph377	117.870801238388	-0.132589480931863	0.24443925450451	-0.54242302939693	0.587527118483705	0.999936646849144
ContigAmph378	313.605895591984	-0.185689580683207	0.202610741262559	-0.916484385408648	0.359412893536894	0.999936646849144
ContigAmph379	59.1250024983524	-0.357490082730517	0.29831216094553	-1.19837582751376	0.230770738561185	0.999936646849144
ContigAmph380	69.5973200954225	0.189735606552707	0.417224277285155	0.454756870303188	0.649284161941825	0.999936646849144
ContigAmph381	75.7005959039819	0.379295074835814	0.276912771003011	1.3697276346698	0.170771938902956	0.999936646849144
ContigAmph382	95.7473281990779	0.0354439190692704	0.249160463568208	0.142253383870301	0.886879866259318	0.999936646849144
ContigAmph383	361.63397194658	-0.0010030752254149	0.204923365986179	-0.00489487970582404	0.996094466651739	0.999936646849144
ContigAmph385	347.574929037938	-0.315475337140345	0.209619027775767	-1.50499379988449	0.132325670772949	0.999936646849144
ContigAmph387	47.9296574369979	0.321745699721513	0.332960670671669	0.96631743044146	0.333885366666509	0.999936646849144
ContigAmph388	133.996633754116	-0.0324134229753144	0.228838027020355	-0.141643517021021	0.887361591833795	0.999936646849144
ContigAmph390	22.6252995464721	-0.405122230821491	0.46086073902651	-0.87905563766886	0.379371109574422	0.999936646849144
ContigAmph391	36.5752536037872	0.291496532815715	0.380928907023193	0.765225551123553	0.444137247228899	0.999936646849144
ContigAmph392	35.7513620447398	-0.0737749033956688	0.396696145294374	-0.185973330648129	0.852465675524561	0.999936646849144
ContigAmph393	38.9319153738104	0.254507997650509	0.395025646150395	0.644282213397385	0.519392447329367	0.999936646849144
ContigAmph394	33.8913707086961	-0.112861022223145	0.382351946654085	-0.295175748968398	0.767859626599559	0.999936646849144
ContigAmph395	60.6723461305215	0.162401304517819	0.307028868802412	0.528944737839398	0.596843785951371	0.999936646849144
ContigAmph396	32.9553072935949	0.837897590562619	0.392197893922948	2.13641532386003	0.0326455761148761	0.999936646849144
ContigAmph397	45.9644442404627	-0.136193258661909	0.33228118428335	-0.409873520090056	0.68189873097337	0.999936646849144
ContigAmph398	49.4708617356942	-0.00412187939556819	0.316683903657129	-0.0130157527678796	0.989615225033919	0.999936646849144
ContigAmph399	63.3352059806647	-0.0234992154662583	0.29547832314839	-0.079529405798262	0.936611543236527	0.999936646849144
ContigAmph400	307.873564248124	0.0226416376616327	0.183813867539702	0.123176983133453	0.901966951552554	0.999936646849144
ContigAmph401	535.697933645763	-0.299479149192072	0.236863794180434	-1.26435173525904	0.206103808124171	0.999936646849144
ContigAmph402	87.7624050507185	-0.263565358202993	0.297130590304298	-0.887035420799557	0.37505983065056	0.999936646849144
ContigAmph403	19.6802201389824	0.133120952009023	0.532523473020261	0.249981378762544	0.802601749145311	0.999936646849144
ContigAmph404	72.25638340212	-0.638612751596462	0.289748869453498	-2.20402154735225	0.0275228287620211	0.999936646849144
ContigAmph406	141.459717773965	0.0585700325928187	0.230428240441749	0.254179055833328	0.799357230389884	0.999936646849144
ContigAmph407	224.420586020234	0.125038374655682	0.211555504701456	0.591042879418972	0.554491690796521	0.999936646849144
ContigAmph408	34.3101237146538	-0.0337374109855209	0.39413965627843	-0.0855976059452592	0.931786301655103	0.999936646849144
ContigAmph409	35.6539645522243	-0.00083710014782415	0.421315563768443	-0.00198687212106939	0.998414706453343	0.999936646849144
ContigAmph410	41.5299916470847	-0.23517851513426	0.405671281749889	-0.579726802744829	0.562098865662196	0.999936646849144
ContigAmph411	40.0363687613441	0.256942264067289	0.358499497764663	0.716715827133343	0.473549458017812	0.999936646849144
ContigAmph412	210.891330286762	-0.00567520327395601	0.229833905690309	-0.0246926286046023	0.980300134810785	0.999936646849144
ContigAmph413	157.191819644758	-0.0970233938418628	0.228371453234535	-0.424849045130963	0.67094672191487	0.999936646849144
ContigAmph414	86.0351801169957	-0.311542847535842	0.277944815276842	-1.12088022662173	0.262338848698625	0.999936646849144
ContigAmph415	42.9657894101481	-0.612590536592836	0.361031400954568	-1.69677910279589	0.0897384309767947	0.999936646849144
ContigAmph416	45.4554937140237	0.152439754778879	0.401238455547679	0.379923092293841	0.704002505172827	0.999936646849144
ContigAmph417	17.4448248777486	0.0885746165957609	0.543093493050676	0.163092759771836	0.870445400338472	0.999936646849144
ContigAmph418	147.217176492589	-0.0527002127879757	0.338074214492268	-0.155883562037178	0.876124802500849	0.999936646849144
ContigAmph419	30.4998138723916	0.363609414141244	0.402431617294214	0.903530931754333	0.366244179383185	0.999936646849144
ContigAmph420	139.903594858675	0.105771883459181	0.282142339074218	0.374888376577034	0.707743483868718	0.999936646849144
ContigAmph421	33.8527904708644	0.283991019685838	0.394015650982819	0.720760759064927	0.471056722588729	0.999936646849144
ContigAmph422	399.270010354848	-0.0780061673655861	0.230606751498326	-0.338264889725713	0.735163579770036	0.999936646849144
ContigAmph423	244.590896757799	-0.177103639846374	0.201767238457781	-0.877762124317483	0.380072822844777	0.999936646849144
ContigAmph424	41.5498026449964	0.0378139382009384	0.360122446898197	0.105003002524938	0.916373426222463	0.999936646849144
ContigAmph425	165.020016592662	-0.147863135788593	0.273857436643263	-0.539927407489775	0.589247095821177	0.999936646849144
ContigAmph426	211.043573399942	0.00987276982354074	0.223986074682859	0.0440776054382825	0.964842543703272	0.999936646849144
ContigAmph427	61.9896648623754	0.140294942689094	0.31840224874832	0.440621708045754	0.659486884592472	0.999936646849144
ContigAmph428	309.026660712036	0.143014630942437	0.201464101097645	0.709876499898715	0.477780724490718	0.999936646849144
ContigAmph429	86.009607054595	0.0810406791191934	0.265531159261226	0.305202144052204	0.760212199546647	0.999936646849144
ContigAmph430	185.256968125485	0.0400063253136497	0.233887565037807	0.171049389937352	0.864184930256196	0.999936646849144
ContigAmph431	61.2309818993946	0.181122843394802	0.320022603081837	0.565968908603885	0.571414916365271	0.999936646849144
ContigAmph432	39.1825051831091	0.375324502606755	0.522339123697452	0.718545645116465	0.472420914203137	0.999936646849144
ContigAmph433	122.986516748464	0.270026016176962	0.265589243440909	1.01670539317998	0.309293599359557	0.999936646849144
ContigAmph435	23.4091980052418	0.171504861268927	0.461112221555959	0.371937357657119	0.70993948987277	0.999936646849144
ContigAmph436	44.797088080153	-0.22955822452198	0.358754472257419	-0.639875575843034	0.522253493802682	0.999936646849144
ContigAmph437	133.528153836475	0.195450461989207	0.235948754182506	0.828359796458287	0.407466767742603	0.999936646849144
ContigAmph438	192.255468296882	-0.123906469384132	0.249068025311543	-0.49748043422734	0.618850297029273	0.999936646849144
ContigAmph439	62.9343871338135	-0.0769663913019149	0.308818828555359	-0.249228298876595	0.803184190586259	0.999936646849144
ContigAmph440	15.6421714423881	0.0624164458490456	0.536870422877959	0.116259796012704	0.907446647620871	0.999936646849144
ContigAmph441	104.973422650326	0.068605615133803	0.254027581215909	0.270071520601899	0.787105231525095	0.999936646849144
ContigAmph442	36.5026464642516	-0.113447335740216	0.375692621018249	-0.301968496034702	0.762676079059956	0.999936646849144
ContigAmph443	137.166077432602	0.256517461901733	0.234742300159591	1.09276198506762	0.274498316527783	0.999936646849144
ContigAmph444	27.0394938681653	-0.0317271393583999	0.4238014823597	-0.0748632099674243	0.940323548574771	0.999936646849144
ContigAmph445	95.3782640713425	0.221121412618186	0.269287667937553	0.821134567029126	0.411569622375035	0.999936646849144
ContigAmph446	470.747982234907	-0.0455174691913307	0.180231775668139	-0.252549635171669	0.800616253772663	0.999936646849144
ContigAmph447	242.12392536688	-0.308966847527749	0.223502086996429	-1.38238909389998	0.166852262978772	0.999936646849144
ContigAmph448	39.1896996246159	-0.139814892840909	0.372454525580059	-0.375387821165986	0.707372061081961	0.999936646849144
ContigAmph449	231.056830926908	-0.224017373595191	0.268025132770283	-0.83580734119882	0.403263295884631	0.999936646849144
ContigAmph450	235.878832094681	-0.24509169117397	0.267803275995245	-0.915193028401649	0.36009030391142	0.999936646849144
ContigAmph451	386.253781823181	0.0377577054535122	0.190926021172022	0.197760919238415	0.843232124159841	0.999936646849144
ContigAmph452	971.834499955499	-0.145452608136794	0.161246779134219	-0.902049696234378	0.367030469071088	0.999936646849144
ContigAmph453	983.952789955638	-0.0777417249242877	0.170134467151843	-0.456942830137437	0.647712137940115	0.999936646849144
ContigAmph454	25.0513266579455	0.165920113675422	0.445851894861431	0.372141770816046	0.709787297525754	0.999936646849144
ContigAmph455	1549.3111401284	-0.0490688834412413	0.161446705081996	-0.303932393146828	0.761179398288584	0.999936646849144
ContigAmph456	1657.45458751594	0.0810460576856397	0.148882329793274	0.544363174583404	0.586191581676448	0.999936646849144
ContigAmph457	712.304595653059	-0.222642200436449	0.181015474768271	-1.22996224892633	0.218711241855727	0.999936646849144
ContigAmph458	897.235543940971	0.080001096320821	0.198847990448929	0.402322880609488	0.68744641777586	0.999936646849144
ContigAmph459	191.238011604796	0.0127854090622637	0.21439412767741	0.0596350711690266	0.952446285310823	0.999936646849144
ContigAmph460	309.512743958832	-0.105314024467675	0.190875670031972	-0.551741478890605	0.581125487063456	0.999936646849144
ContigAmph461	192.785735399576	-0.18276878620644	0.211083772382735	-0.865859010113979	0.38656748389124	0.999936646849144
ContigAmph462	31.2578619483317	-0.122830793760779	0.38714348841258	-0.317274595691709	0.751035252033492	0.999936646849144
ContigAmph463	287.795819673015	0.111198529388916	0.241021147193832	0.461364202616996	0.644537329831208	0.999936646849144
ContigAmph464	287.46339658958	-0.118497297982033	0.204165242925942	-0.580398976259718	0.561645595346526	0.999936646849144
ContigAmph465	546.910968247003	-0.0520382445915376	0.177744582095891	-0.292769793475133	0.76969811838018	0.999936646849144
ContigAmph466	731.908272177	-0.0147726224525662	0.170157782294535	-0.0868172013842748	0.930816814521927	0.999936646849144
ContigAmph467	12.0464370061489	0.171072353633033	0.665392381529335	0.257099958433309	0.797101609635011	0.999936646849144
ContigAmph468	251.369872014325	0.17541564281937	0.229072566983057	0.765764513532273	0.443816432705975	0.999936646849144
ContigAmph469	389.438997307409	0.0824469273339686	0.182204732867152	0.452496079748279	0.650911644769944	0.999936646849144
ContigAmph470	148.16902513868	-0.230747720493641	0.25238233539803	-0.91427841068881	0.360570571824842	0.999936646849144
ContigAmph471	176.273530556466	-0.0215344272861959	0.226179889370442	-0.0952092926835171	0.924148589025714	0.999936646849144
ContigAmph472	153.356882534271	-0.0671538526940783	0.231695137216229	-0.289837126065391	0.7719408438508	0.999936646849144
ContigAmph473	97.5162673312313	0.0382834836915534	0.255882686734857	0.14961341925889	0.881069620319204	0.999936646849144
ContigAmph474	94.4386406176893	-0.204123842570532	0.278174485833815	-0.733797860571862	0.463071944671542	0.999936646849144
ContigAmph475	766.24592979536	-0.215844695137925	0.198499504073982	-1.08738153349481	0.276868228851757	0.999936646849144
ContigAmph476	139.765411643194	-0.502350013524239	0.286735277001007	-1.75196445578084	0.0797799199878908	0.999936646849144
ContigAmph477	32.8704034093615	0.0644991786378823	0.401500729434914	0.160645234016537	0.872372825958134	0.999936646849144
ContigAmph478	1415.55180146507	-0.210217634169726	0.158502139101878	-1.32627632258393	0.184748186635554	0.999936646849144
ContigAmph479	1333.33619346317	-0.0292369231833584	0.161394067218568	-0.181152403475676	0.856247952934118	0.999936646849144
ContigAmph480	119.292732557641	0.189138845418128	0.239559391024397	0.789527993911397	0.429803474840894	0.999936646849144
ContigAmph481	346.806953711804	-0.0873446437929755	0.281320780588023	-0.310480596600101	0.75619551260679	0.999936646849144
ContigAmph482	555.171218886555	-0.0532600857730541	0.240997323595976	-0.22099866080813	0.825093475721128	0.999936646849144
ContigAmph483	251.203344592589	0.142527832913029	0.261858541942785	0.544293235025232	0.586239701463431	0.999936646849144
ContigAmph484	2897.39194724837	0.246960248319624	0.170885418390514	1.44518034742591	0.148407235042371	0.999936646849144
ContigAmph485	896.420106098373	0.0201208619200101	0.167812770948241	0.119900659564319	0.904561841989361	0.999936646849144
ContigAmph486	226.255770115475	-0.0766176124274946	0.268048856368214	-0.285834505938897	0.775004878269087	0.999936646849144
ContigAmph487	550.694713397539	-0.266468163728675	0.186880801172307	-1.42587233175968	0.153905197255831	0.999936646849144
ContigAmph488	174.831816328701	0.101876069984054	0.231388296935272	0.440281860981726	0.659732976595231	0.999936646849144
ContigAmph490	816.424062895748	-0.0212969147948577	0.160893397839546	-0.132366617156637	0.894694317952317	0.999936646849144
ContigAmph491	234.214069931725	-0.159016755653389	0.235836848336069	-0.674265946035664	0.500142250173231	0.999936646849144
ContigAmph492	505.593105229443	-0.138222039490317	0.182239190577771	-0.758464955052193	0.448172685107208	0.999936646849144
ContigAmph493	500.077542762271	-0.058116745776807	0.196369322525919	-0.295956338949716	0.767263424918367	0.999936646849144
ContigAmph494	324.958417671398	0.0136978042039619	0.210196736141456	0.065166588479964	0.948041363092504	0.999936646849144
ContigAmph495	1583.26605968474	-0.229354988133333	0.162548044524199	-1.41099813784095	0.158245163098759	0.999936646849144
ContigAmph496	546.108907137217	0.00954378472547896	0.17714630526236	0.0538751554052697	0.957034631025028	0.999936646849144
ContigAmph498	256.394281345234	-0.103232473326269	0.191019468482233	-0.540429068023874	0.588901165960498	0.999936646849144
ContigAmph499	63.3079679988633	-0.279478922497109	0.29838188269611	-0.93664843177408	0.348939430467591	0.999936646849144
ContigAmph500	119.711068980671	0.276198334154016	0.240102459254407	1.15033529857086	0.25000579762556	0.999936646849144
ContigAmph501	127.362698445738	-0.363330176752278	0.258090085538957	-1.40776495150348	0.159200681784906	0.999936646849144
ContigAmph502	82.2211950504937	-0.0410920882669659	0.307822995359396	-0.133492587904257	0.893803825804304	0.999936646849144
ContigAmph503	274.859591699507	0.136974729229566	0.18653845761305	0.734297532971474	0.462767421154784	0.999936646849144
ContigAmph504	36.5468189712275	0.345981208226233	0.396347196637987	0.87292457512256	0.382704190303257	0.999936646849144
ContigAmph505	94.9896432287161	-0.0114951553342932	0.259457400808629	-0.0443045960472404	0.964661608157902	0.999936646849144
ContigAmph506	377.201887807517	-0.0983567276221893	0.174546549673479	-0.563498549849214	0.573095447284109	0.999936646849144
ContigAmph507	102.87835959929	-0.0448001610181525	0.290034872154864	-0.154464739654587	0.87724331119668	0.999936646849144
ContigAmph508	118.513024713247	0.0309410428976781	0.254623827243644	0.121516682993187	0.903281801504124	0.999936646849144
ContigAmph509	634.910259691821	0.0589167503978182	0.169712796433605	0.347155616052014	0.728474412921053	0.999936646849144
ContigAmph510	923.5894506242	-0.000254863620995386	0.181367005144336	-0.00140523697125924	0.998878783485372	0.999936646849144
ContigAmph512	136.566908286596	0.18403877440156	0.222935412179213	0.825525081917516	0.409073548879128	0.999936646849144
ContigAmph513	103.140424770847	0.166136322217175	0.287719822751486	0.577423969709145	0.563653085769615	0.999936646849144
ContigAmph514	917.926011001472	-0.146042319165698	0.188367106580118	-0.775306909030755	0.438158327770179	0.999936646849144
ContigAmph515	29.6598251809418	-0.0651300780312366	0.63904903261616	-0.101917184295867	0.918822409892148	0.999936646849144
ContigAmph518	20.9843214319664	-0.0333218570178618	0.516402579522219	-0.0645268988561047	0.948550689547459	0.999936646849144
ContigAmph519	31.2606482195736	-0.317094048471604	0.412550226021546	-0.768619257658685	0.442119369843082	0.999936646849144
ContigAmph520	859.242112529367	0.129421406035756	0.175741903164546	0.736428840847245	0.461469758264826	0.999936646849144
ContigAmph521	141.128563492929	0.115078145722777	0.270247862710542	0.42582444341488	0.670235774245403	0.999936646849144
ContigAmph522	186.120586163295	-0.094826349758562	0.212502295986953	-0.446236824492399	0.65542618545019	0.999936646849144
ContigAmph523	115.183426504362	0.234232857071008	0.267353804285669	0.876115668886197	0.380967155442979	0.999936646849144
ContigAmph524	1919.577691665	-0.0232766699969151	0.182306481272354	-0.127678784837832	0.898403179908672	0.999936646849144
ContigAmph525	180.412410458924	0.0826278869722693	0.213791407997347	0.386488342755545	0.69913503435829	0.999936646849144
ContigAmph526	802.062732033144	0.0522719890282245	0.19945773139981	0.262070508179229	0.793267083409832	0.999936646849144
ContigAmph527	132.608780132022	0.0133696914021425	0.237417941271349	0.056312894175348	0.955092547068816	0.999936646849144
ContigAmph528	44.6136168170584	0.456042275527326	0.358449022239006	1.27226536336664	0.203278850688518	0.999936646849144
ContigAmph530	454.940582451126	0.238334807188911	0.239000765994148	0.997213570414862	0.318660855338196	0.999936646849144
ContigAmph531	235.017523824327	-0.0340017473985322	0.217426665837281	-0.156382600393544	0.875731451310494	0.999936646849144
ContigAmph532	3363.09510554672	-0.403149783201358	0.236481057604526	-1.70478679047333	0.0882341960294959	0.999936646849144
ContigAmph533	290.972033511383	-0.0736812225643006	0.186800523627508	-0.394437987289724	0.69325770252556	0.999936646849144
ContigAmph534	237.84372562542	-0.295707020565454	0.226766423226096	-1.30401589599807	0.192228162579555	0.999936646849144
ContigAmph535	139.487981933826	-0.0675932454582541	0.229963983889757	-0.293929702881899	0.768811620493005	0.999936646849144
ContigAmph536	2515.17305858897	0.15150558238969	0.194942262252661	0.777181821114434	0.437051505929838	0.999936646849144
ContigAmph537	955.949922010269	-0.0717012117203055	0.166440997151091	-0.43079056811476	0.666620658236718	0.999936646849144
ContigAmph538	336.305656215118	-0.101407004470753	0.18735483353786	-0.541256409326961	0.588330861417962	0.999936646849144
ContigAmph539	293.617401280882	0.0293743366953802	0.228656169066957	0.12846509593528	0.89778091871914	0.999936646849144
ContigAmph540	191.423273310921	-0.0377243392843442	0.212044672085122	-0.177907508419737	0.85879561405207	0.999936646849144
ContigAmph541	175.990639115773	-0.0871623930546859	0.291227985913058	-0.299292641060626	0.764716768991392	0.999936646849144
ContigAmph542	1790.99301378027	-0.158417805198176	0.265956112155833	-0.595653936711762	0.551406436496599	0.999936646849144
ContigAmph543	782.824512400585	0.203582333495915	0.164631018845904	1.23659766502733	0.216236487215565	0.999936646849144
ContigAmph544	234.646229048598	0.0225526608171097	0.290806604186787	0.0775520930144487	0.938184351782195	0.999936646849144
ContigAmph545	1049.2570482355	0.0008822456470384	0.164571507063383	0.00536086509008278	0.995722668999699	0.999936646849144
ContigAmph547	1840.74277567458	0.0202789617614153	0.157742626428574	0.128557272187918	0.897707977520491	0.999936646849144
ContigAmph548	841.890934575339	-0.0609599865175617	0.305872326948265	-0.199298796088449	0.84202902086596	0.999936646849144
ContigAmph549	5752.04619633514	-0.00671375685396322	0.20849027299813	-0.0322017749673311	0.974311140695394	0.999936646849144
ContigAmph550	232.857811718837	-0.209988358288871	0.196978068016896	-1.06604943587353	0.286401295162079	0.999936646849144
ContigAmph551	23.1100826415787	0.154666998868097	0.503040524908491	0.307464292059239	0.758489998344364	0.999936646849144
ContigAmph552	1937.07227319707	0.0561448892513402	0.148396136632765	0.378344682855739	0.705174555886607	0.999936646849144
ContigAmph553	297.64632647755	-0.244760006095609	0.195483714399195	-1.25207364126398	0.210543031403372	0.999936646849144
ContigAmph554	389.418939774819	0.0403233101468106	0.195697007012178	0.206049702866949	0.836752086935143	0.999936646849144
ContigAmph555	960.062669463895	-0.020699932367044	0.158907143592905	-0.130264328582194	0.89635730121954	0.999936646849144
ContigAmph556	214.676375485581	-0.129880156466513	0.235378940725598	-0.551791745115915	0.581091043613869	0.999936646849144
ContigAmph557	414.493466878934	-0.384102538785495	0.249556181583607	-1.53914255438635	0.123769498170968	0.999936646849144
ContigAmph558	67.2818691775602	0.338256329833168	0.296105300834933	1.1423514840139	0.253307949067335	0.999936646849144
ContigAmph559	494.165384515901	-0.398878718520885	0.281602307708666	-1.41646111413813	0.156640541584573	0.999936646849144
ContigAmph560	160.492524801928	0.0613524298497708	0.222223622268864	0.276084194935594	0.782483399700395	0.999936646849144
ContigAmph561	1147.55913469641	-0.0280291969411724	0.244374712231349	-0.11469761615366	0.908684803492914	0.999936646849144
ContigAmph562	1245.1724853612	-0.0176713576888094	0.166213276641281	-0.106317365531199	0.915330553976614	0.999936646849144
ContigAmph563	668.469066111092	0.00920478114317513	0.170022769607761	0.0541385201782699	0.956824802570011	0.999936646849144
ContigAmph564	251.439449386168	0.0344242221306977	0.244863721114665	0.140585228281234	0.888197618453784	0.999936646849144
ContigAmph565	48.5750330750094	0.0745682385017896	0.35718801236049	0.208764672725164	0.834631950730608	0.999936646849144
ContigAmph566	79.7146253029267	-0.0409019797536513	0.301964017776797	-0.135453157812614	0.892253597498935	0.999936646849144
ContigAmph567	76.8006969547775	0.0479379763154261	0.354697993894296	0.135151529302735	0.892492069388993	0.999936646849144
ContigAmph568	37.6505874532139	-0.298453565059349	0.384513852934925	-0.77618416808993	0.437640252570169	0.999936646849144
ContigAmph569	80.8700636498545	-0.285836145966576	0.276957227559892	-1.03205880736499	0.302044569407567	0.999936646849144
ContigAmph570	2440.07265075189	-0.0156331835398522	0.185865465469305	-0.0841102111162977	0.932968806118193	0.999936646849144
ContigAmph571	1671.53734533084	0.00531252504232921	0.170352786284804	0.0311854308825186	0.975121658735629	0.999936646849144
ContigAmph572	33.3585853755037	-0.0976222602344618	0.410775708488882	-0.237653440106242	0.812149898480871	0.999936646849144
ContigAmph573	22.4812307650382	-0.235418104603866	0.46657358510885	-0.504568008385953	0.613862284314802	0.999936646849144
ContigAmph574	37.3861701401155	-0.332567998928102	0.42227423107494	-0.787564038851052	0.430951756372671	0.999936646849144
ContigAmph575	29.6115256483967	0.863355284205549	0.426339162720207	2.02504334506127	0.0428629136011046	0.999936646849144
ContigAmph576	30.8440239598568	0.102905840683382	0.451143121480057	0.228100209853097	0.819568336955041	0.999936646849144
ContigAmph577	58.3603551029539	0.480454658692925	0.306110303327149	1.56954749144607	0.116520422555444	0.999936646849144
ContigAmph578	27.9108146340839	0.170495371775587	0.465712366005973	0.366095865647254	0.71429354243403	0.999936646849144
ContigAmph580	36.9726295410362	0.176902114504694	0.359747810108129	0.491739239361939	0.622903694933234	0.999936646849144
ContigAmph581	229.068381121465	0.102400474175331	0.261663828357784	0.391343636673063	0.695543248152213	0.999936646849144
ContigAmph582	116.266984831635	-0.105656000889166	0.237066297577461	-0.445681237564537	0.655827519447253	0.999936646849144
ContigAmph583	58.312972216314	-0.357108874990546	0.324817495604987	-1.09941391649922	0.271587563342945	0.999936646849144
ContigAmph584	400.602260618476	0.0394456020804271	0.210816421291435	0.18710877377952	0.851575349165327	0.999936646849144
ContigAmph586	519.264044169471	-0.0751686043694995	0.186870860789124	-0.402248933044323	0.687500833215741	0.999936646849144
ContigAmph587	11.9813294530924	0.124893794556128	0.598094630222228	0.208819454723614	0.834589183454687	0.999936646849144
ContigAmph588	595.765470422932	-0.137642571860751	0.173307585042694	-0.794209738868861	0.42707333986261	0.999936646849144
ContigAmph589	755.384375773486	-0.0040703752179718	0.159978646602774	-0.025443240734987	0.979701421140646	0.999936646849144
ContigAmph590	285.525566214458	-0.0816701518957216	0.208131618160094	-0.392396660429081	0.694765153191824	0.999936646849144
ContigAmph591	20340.2265225438	-0.0504766625499456	0.142151555554217	-0.355090469134497	0.722521816542382	0.999936646849144
ContigAmph592	2644.45646972828	-0.14280646319919	0.152561305471852	-0.936059525431483	0.349242540662538	0.999936646849144
ContigAmph593	60.8951908643242	-0.464544640173434	0.30053045021101	-1.54574899098333	0.122165200471666	0.999936646849144
ContigAmph594	85.1215854840726	-0.239447596630094	0.279907236440526	-0.855453398329596	0.392300192823051	0.999936646849144
ContigAmph595	318.234613614123	0.0467627278985428	0.195785191348322	0.238847113903253	0.811224135678485	0.999936646849144
ContigAmph596	586.717427260234	-0.174975108044752	0.218709241853302	-0.800035273141845	0.423690360792677	0.999936646849144
ContigAmph597	37497.0511210088	-0.0326945705966528	0.168379593368754	-0.194171811099764	0.846041354274851	0.999936646849144
ContigAmph598	5034.26671846903	0.0463026299316474	0.144665281882916	0.320067325960917	0.748917293914395	0.999936646849144
ContigAmph599	1203.18031545784	0.0150262105451208	0.156725060089703	0.0958762468268983	0.92361885994279	0.999936646849144
ContigAmph600	41.8711593734722	-0.0117975884632372	0.405856992968613	-0.0290683385222578	0.97681008732108	0.999936646849144
ContigAmph601	4418.70279091416	0.00109193977141289	0.167253049935693	0.0065286688155028	0.994790912954476	0.999936646849144
ContigAmph602	557.932482675798	-0.122709894587838	0.214057953071897	-0.573255479774782	0.566471724666475	0.999936646849144
ContigAmph603	539.229670250834	0.112709762569582	0.181340245227064	0.62153749945829	0.534246029319371	0.999936646849144
ContigAmph604	3203.02172848273	-0.051535911570397	0.175563025915356	-0.293546498767024	0.769104463130123	0.999936646849144
ContigAmph605	1767.39391436535	0.466550031038987	0.241387636442528	1.93278345947958	0.053262878785818	0.999936646849144
ContigAmph606	152.677535162777	-0.0255982717047673	0.22207758897164	-0.115267244314492	0.908233300522005	0.999936646849144
ContigAmph607	4760.06614527057	-0.0141417411449559	0.157366764597612	-0.0898648528557886	0.928394611466569	0.999936646849144
ContigAmph608	125.157091891924	-0.140699481545318	0.322185843704497	-0.43670286666712	0.662326850003439	0.999936646849144
ContigAmph609	6365.5025186635	0.0174982353263848	0.149111978746649	0.117349628604389	0.906582998733415	0.999936646849144
ContigAmph610	2511.14848926136	-0.00147754898566028	0.171064637094413	-0.00863737246199402	0.993108459556425	0.999936646849144
ContigAmph611	1365.97360299884	0.0987333600825297	0.285321619233393	0.346042337583139	0.729310897172215	0.999936646849144
ContigAmph613	1571.61791062513	-0.267083709206423	0.229653862466874	-1.16298374578807	0.244836097250181	0.999936646849144
ContigAmph614	6950.057888535	-0.0198769028473335	0.179471508378749	-0.11075241427952	0.911812681018473	0.999936646849144
ContigAmph615	183.651926492284	-0.371117974613264	0.238246055046066	-1.55770879203648	0.119302295380036	0.999936646849144
ContigAmph616	1351.53788945754	-0.0423480339855284	0.157520861797839	-0.26884079671858	0.788052197417798	0.999936646849144
ContigAmph619	92.3600148161583	0.0948993678342831	0.286899334053964	0.330775838665534	0.740813812470264	0.999936646849144
ContigAmph620	426.499847737196	-0.292571462634906	0.205000844130403	-1.42717198983238	0.153530326067031	0.999936646849144
ContigAmph621	1584.57769630285	-0.225472988641013	0.158997914724184	-1.41808770908816	0.156165159199797	0.999936646849144
ContigAmph622	5929.70815258687	0.0109957255984314	0.168667457882547	0.0651917431878791	0.948021335127283	0.999936646849144
ContigAmph623	2415.57619592429	-0.0842625284821678	0.147888924435354	-0.569769026341125	0.568834365970951	0.999936646849144
ContigAmph624	410.492718980173	-0.159428633371553	0.190289549678122	-0.837821276266769	0.402131087490624	0.999936646849144
ContigAmph625	295.875197524707	-0.116396418435339	0.192401650598582	-0.604965799790266	0.545201721076764	0.999936646849144
ContigAmph627	2066.62185266545	-0.0108839383055451	0.165904433538973	-0.065603661538004	0.947693373910139	0.999936646849144
ContigAmph628	4147.45525075777	0.0751906864519673	0.156782794521267	0.479585063409288	0.631522469318642	0.999936646849144
ContigAmph629	4399.98753794553	0.0523626065939108	0.157798182370425	0.331832761362178	0.740015544626593	0.999936646849144
ContigAmph630	2578.1037223285	-0.0931310786854638	0.196109500742336	-0.474893252662076	0.634863060951323	0.999936646849144
ContigAmph631	6173.66757719341	0.00238588710666905	0.144040496641053	0.0165640022237263	0.986784442680321	0.999936646849144
ContigAmph632	306.438020054429	-0.0566423442464369	0.254197928457261	-0.22282771771667	0.823669594686315	0.999936646849144
ContigAmph633	7403.97555680569	0.0735220445535552	0.191073069223241	0.384784966570331	0.700396738124052	0.999936646849144
ContigAmph634	322.16893231568	0.0248880364959152	0.233044110495638	0.10679538926336	0.91495130539157	0.999936646849144
ContigAmph635	4414.35491303591	0.0180413982268138	0.16071470962898	0.112257292866742	0.910619403056618	0.999936646849144
ContigAmph636	363.254668341243	0.184128323318962	0.263275058560767	0.699376250547724	0.484316925913673	0.999936646849144
ContigAmph637	31.4099182580531	0.477100703974028	0.435142729795714	1.09642347511588	0.272893495377985	0.999936646849144
ContigAmph638	30.3348139558483	0.0323637940200791	0.609888253895771	0.0530651210502081	0.957680021649408	0.999936646849144
ContigAmph639	110.794401486956	-0.33775029620934	0.272523764884708	-1.23934254450149	0.215218669347097	0.999936646849144
ContigAmph640	19.5778529161075	-0.147399351050612	0.508746254347132	-0.289730587284161	0.772022354230221	0.999936646849144
ContigAmph641	151.384962499782	0.0856750237595188	0.263597718848695	0.325021870954415	0.745164518946475	0.999936646849144
ContigAmph642	194.312886212439	0.329251534849852	0.204200378467197	1.61239434187799	0.106876155336921	0.999936646849144
ContigAmph643	521.984191372229	0.035140786132033	0.167596697723729	0.209674692934345	0.833921578583428	0.999936646849144
ContigAmph644	259.800960768915	0.315758194138402	0.195750782261903	1.61306223397839	0.106730987721109	0.999936646849144
ContigAmph645	38.4219729271987	-0.203104989552325	0.403717513006369	-0.503086893704115	0.614903180955923	0.999936646849144
ContigAmph646	1544.50946804468	0.114358643986196	0.183165307495596	0.624346638289814	0.532399961255718	0.999936646849144
ContigAmph647	78.8727969648861	0.195743745710566	0.278114448323568	0.703824439508553	0.481542111838771	0.999936646849144
ContigAmph648	63.4348601889223	0.701421202048939	0.342030107869955	2.05075864933981	0.0402904562917901	0.999936646849144
ContigAmph649	296.816076185781	0.304352634722322	0.193895533547267	1.56967326247424	0.116491144645714	0.999936646849144
ContigAmph650	457.638232994746	0.205128675496277	0.188294750050662	1.08940199044894	0.275976654045157	0.999936646849144
ContigAmph651	198.396027873855	0.440226518498168	0.267478414752047	1.64583941813121	0.099796824391055	0.999936646849144
ContigAmph652	11.8176456492346	-0.846030499604035	0.64655164461202	-1.30852733366987	0.19069450975424	0.999936646849144
ContigAmph653	395.743446172241	-0.113699989896297	0.179672008900678	-0.632819717394881	0.526851379223107	0.999936646849144
ContigAmph654	129.647756680344	0.119870127354392	0.231049886064112	0.518806260398372	0.603895851811909	0.999936646849144
ContigAmph655	3856.73191815622	0.047889478055443	0.153764232014614	0.311447450606663	0.755460485918902	0.999936646849144
ContigAmph656	164.239989095747	-0.145315001460103	0.237210229584009	-0.612600062463323	0.54014081693045	0.999936646849144
ContigAmph657	30.9643853389925	0.878284837912954	0.402332270860839	2.1829838208945	0.0290370015014614	0.999936646849144
ContigAmph658	352.75171390453	0.593463638734823	0.310902665803424	1.90884062444822	0.0562826544670128	0.999936646849144
ContigAmph659	105.311951626074	-0.143086187473296	0.362296779763635	-0.394941924591896	0.692885748441152	0.999936646849144
ContigAmph660	467.208785016672	-0.00328724469834999	0.190263544494936	-0.017277322921089	0.98621537659121	0.999936646849144
ContigAmph661	239.787491496213	-0.119341050517643	0.230597426277008	-0.517529846036888	0.604786339857183	0.999936646849144
ContigAmph662	44.0045248808011	-0.100998809021186	0.398061168823761	-0.253726856401566	0.799706584444345	0.999936646849144
ContigAmph663	49.4371533645775	0.359625396648645	0.355464178573614	1.01170643436345	0.311678438113005	0.999936646849144
ContigAmph664	38.117140276929	0.246012239065607	0.36561599519038	0.672870559006878	0.50102964375243	0.999936646849144
ContigAmph665	73.8568140188162	0.075083216606382	0.314833025475598	0.238485833857356	0.811504301376666	0.999936646849144
ContigAmph666	69.0901152180457	0.225137912749563	0.30497008323378	0.738229502259014	0.460374997915247	0.999936646849144
ContigAmph667	99.2401595741926	0.0792275467010728	0.253419307446776	0.312634216782051	0.754558579072018	0.999936646849144
ContigAmph668	164.080195242657	0.266395170403976	0.230590227024939	1.15527519895786	0.247977748766929	0.999936646849144
ContigAmph669	130.016999286127	0.24068650369259	0.244380708999709	0.984883400485086	0.324681347937312	0.999936646849144
ContigAmph670	449.886657410065	-0.0620669749310872	0.222797002603429	-0.278580834597511	0.780566522434006	0.999936646849144
ContigAmph671	53.4773836878328	-0.109850053501585	0.338014355707823	-0.324986355303022	0.745191398564203	0.999936646849144
ContigAmph672	110.280077634687	0.171944448858814	0.405950097620003	0.42356055551381	0.671886327038998	0.999936646849144
ContigAmph673	309.45223802542	-0.1610096517759	0.183407152746319	-0.87788098427438	0.380008309682201	0.999936646849144
ContigAmph674	76.1690968925779	-0.593383208102072	0.279243436390316	-2.12496743261912	0.0335893304773668	0.999936646849144
ContigAmph675	52.5473434637839	0.0110948035055714	0.365932789074911	0.0303192384962808	0.975812453524049	0.999936646849144
ContigAmph676	13.3120924741366	-0.0482958817347099	0.615822654164528	-0.0784249838944814	0.937490000457802	0.999936646849144
ContigAmph677	115.267550867625	-0.142407067637533	0.241442695595123	-0.589817253682159	0.555313174067244	0.999936646849144
ContigAmph678	47.1486159886815	0.098824704406027	0.360773475366036	0.273924529251383	0.784142620678662	0.999936646849144
ContigAmph679	29.9663834013312	0.522972215294112	0.413922994459894	1.26345291828136	0.206426456642142	0.999936646849144
ContigAmph680	218.63660788438	-0.0796728050003959	0.210673490274143	-0.378181445120219	0.705295808345842	0.999936646849144
ContigAmph681	11.2090156891192	0.317883937059783	0.620814780555797	0.51204311980973	0.608620831719299	0.999936646849144
ContigAmph682	68.697392703321	-0.105279220875039	0.384272852022396	-0.273969967748082	0.784107701200381	0.999936646849144
ContigAmph683	297.763027131284	0.0429892700839408	0.27032334863349	0.159029067600914	0.873645972615035	0.999936646849144
ContigAmph684	235.572277720957	-0.0412339633967498	0.214819443494122	-0.191947072974696	0.847783664044618	0.999936646849144
ContigAmph685	82.9788271499404	-0.142975460242897	0.266903870960887	-0.535681478609387	0.592178706281885	0.999936646849144
ContigAmph686	57.1649055426897	0.00287511198385248	0.307639274056393	0.00934572477025623	0.992543299044364	0.999936646849144
ContigAmph687	539.324126721747	0.345165623289407	0.200182264628316	1.72425676135838	0.0846615012682661	0.999936646849144
ContigAmph688	299.444091815469	-0.120585871082606	0.212540152325028	-0.567355719676905	0.570472527778341	0.999936646849144
ContigAmph689	11.4342333641317	-0.347308479978302	0.646544903031952	-0.53717611622891	0.591145967343707	0.999936646849144
ContigAmph690	705.543426000507	-0.0967863600143783	0.270194279344287	-0.358210248748646	0.720185978066523	0.999936646849144
ContigAmph691	10.8533349381752	-0.333896587694619	0.659952255504729	-0.505940520559713	0.612898405384132	0.999936646849144
ContigAmph692	26.878094263879	-0.10173491041457	0.442790138538959	-0.229758753774997	0.818279237024113	0.999936646849144
ContigAmph693	216.765563462976	-0.0563022785277084	0.260750752575038	-0.21592374315969	0.829047189265025	0.999936646849144
ContigAmph694	75.9744719544701	0.459934469047958	0.424771289878138	1.08278144028969	0.278905445427332	0.999936646849144
ContigAmph695	38.1347417980073	-0.00870722110662909	0.394527648261797	-0.0220699896318831	0.982392125447537	0.999936646849144
ContigAmph696	344.579317864932	-0.256486942888527	0.208295944815859	-1.23135831144131	0.218188881654619	0.999936646849144
ContigAmph697	94.550079751681	0.17670869315822	0.310189164137108	0.569680419526559	0.568894472849437	0.999936646849144
ContigAmph698	160.777999465455	0.198284276398274	0.227519138200364	0.871505922388188	0.383477973578954	0.999936646849144
ContigAmph699	10.3455912190925	0.214638261155285	0.782350446144223	0.274350532057749	0.783815254655607	0.999936646849144
ContigAmph700	47.5268910160779	-0.0857273870560093	0.325493684031742	-0.263376499335235	0.792260402168767	0.999936646849144
ContigAmph701	106.008232778741	-0.145651119400302	0.258780743994804	-0.562836002215166	0.573546562331153	0.999936646849144
ContigAmph702	206.394466210494	0.0639463857292641	0.225821098552613	0.283172768794079	0.777044401739865	0.999936646849144
ContigAmph703	170.44507836875	-0.179520479206212	0.210407417121553	-0.853204139198678	0.393546108389882	0.999936646849144
ContigAmph704	49.1218933026049	0.26056993201914	0.333191615432715	0.782042284229567	0.434189723924725	0.999936646849144
ContigAmph705	210.644904215592	-0.359666875887031	0.290469804977116	-1.2382246613047	0.215632769740635	0.999936646849144
ContigAmph706	64.7364194167063	-0.369753446293637	0.302617762329806	-1.22184977989053	0.221764439695235	0.999936646849144
ContigAmph707	62.3716770851682	0.110029498513709	0.30037653620797	0.366305237761741	0.714137321641292	0.999936646849144
ContigAmph708	22.1526637464051	-0.639193982269178	0.500713022452693	-1.27656752192733	0.201754974242759	0.999936646849144
ContigAmph709	39.6469378890648	-0.224638427283417	0.569288880526592	-0.394594791796437	0.693141957825398	0.999936646849144
ContigAmph710	51.3516632377277	0.038245535647345	0.329764784036928	0.11597822902479	0.907669796064959	0.999936646849144
ContigAmph711	81.893946983985	0.0501303355603551	0.283625163972114	0.176748546773106	0.859705906327267	0.999936646849144
ContigAmph712	94.9807035918734	-0.0934785036065313	0.284262901605872	-0.328845245293874	0.74227266241214	0.999936646849144
ContigAmph713	113.528950782116	-0.118645562267833	0.242814342024352	-0.488626665454277	0.62510603108517	0.999936646849144
ContigAmph714	562.641669189678	-0.185588165743457	0.17067610885862	-1.0873704995067	0.276873103245245	0.999936646849144
ContigAmph715	314.290745229724	-0.12622987877468	0.213991813686137	-0.589881811833337	0.555269888736407	0.999936646849144
ContigAmph716	200.126315682264	0.40525607404413	0.289333622408886	1.40065323438775	0.161317793642868	0.999936646849144
ContigAmph717	21.9412243472728	-0.356620941448042	0.539002244355511	-0.661631644733605	0.508207321921369	0.999936646849144
ContigAmph718	35.668110081656	-0.0965685346630339	0.397338909013853	-0.24303820358974	0.807975802345926	0.999936646849144
ContigAmph719	81.2528585151722	0.0462067731822711	0.276964389921387	0.166832902942455	0.867501528684559	0.999936646849144
ContigAmph720	10926.5857254548	0.0318266417621137	0.143943022695657	0.221105831780438	0.825010029528009	0.999936646849144
ContigAmph721	3328.36044654571	-0.0968296772799768	0.177534716178285	-0.545412634578683	0.585469752710574	0.999936646849144
ContigAmph722	355.719659038477	0.0808242782490908	0.184628223018019	0.437767730891298	0.661554665251889	0.999936646849144
ContigAmph723	179.587118644087	-0.00451660062638377	0.31173702584786	-0.0144884959176715	0.9884402572296	0.999936646849144
ContigAmph724	198.811276264757	0.0499416497367103	0.215300336094712	0.231962711450393	0.816566975878549	0.999936646849144
ContigAmph725	197.695850536729	-0.173441637777696	0.215010559752213	-0.806665672502677	0.419859126409698	0.999936646849144
ContigAmph726	1348.70754483783	-0.367374364974718	0.1627264541946	-2.25761918547912	0.0239694114891424	0.999936646849144
ContigAmph727	59.6793922343376	0.499609046493821	0.306307199053329	1.63107183911416	0.102875161961635	0.999936646849144
ContigAmph728	298.957217847049	0.353711876972717	0.223451535377344	1.58294672880811	0.11343360677185	0.999936646849144
ContigAmph729	74.5812377413185	0.211949979435463	0.275696725486638	0.768779458883111	0.442024245018421	0.999936646849144
ContigAmph730	256.698508540344	-0.041208695794053	0.203342846537175	-0.202656235494959	0.839403732305585	0.999936646849144
ContigAmph731	790.133594097026	-0.0330050173229637	0.192597327354997	-0.171367992361226	0.863934420857235	0.999936646849144
ContigAmph732	612.850020546293	-0.0404118004974032	0.203427108278627	-0.19865494249691	0.842532672129644	0.999936646849144
ContigAmph733	610.507090439295	0.0472592327987748	0.166859354931042	0.283227948581639	0.777002105248148	0.999936646849144
ContigAmph734	2000.46254393697	0.0183746003819891	0.218635863529204	0.0840420235060603	0.933023020007217	0.999936646849144
ContigAmph735	523.783383916938	0.0337492921647479	0.178964721456942	0.188580698419201	0.850421461798459	0.999936646849144
ContigAmph736	353.145271755819	0.220445364608631	0.183156778698057	1.20358834751099	0.228748725491332	0.999936646849144
ContigAmph737	3107.97148047377	-0.0127090785988857	0.146532543902075	-0.0867321228475973	0.930884442279711	0.999936646849144
ContigAmph738	154.602901519874	0.0600040769758384	0.239806732044838	0.25021848412754	0.80241839155755	0.999936646849144
ContigAmph739	380.289063065006	0.20600173951943	0.208861804590912	0.986306423632203	0.323982768537598	0.999936646849144
ContigAmph740	478.066395221097	0.209004157891041	0.185591457400746	1.1261518219545	0.260101262132754	0.999936646849144
ContigAmph741	7484.38783857445	0.0271779196128416	0.179756701859589	0.151192803003643	0.879823627404593	0.999936646849144
ContigAmph742	96.7979044979878	-0.114149694737381	0.30003401708209	-0.380455842465856	0.703607069069258	0.999936646849144
ContigAmph743	253.333898620071	0.119860683895307	0.192509516893842	0.622622121904777	0.533532870458614	0.999936646849144
ContigAmph744	274.093532182045	0.0478025991405469	0.218620694567629	0.218655417023018	0.826918480614806	0.999936646849144
ContigAmph745	523.408019177199	-0.431749563691728	0.267841768189076	-1.61195756214895	0.106971174826631	0.999936646849144
ContigAmph746	750.061640140894	0.0298666529126585	0.166946737095096	0.178899291069378	0.858016779450969	0.999936646849144
ContigAmph747	189.98213184452	-0.152847494313386	0.219806326443416	-0.695373498964021	0.486821264011012	0.999936646849144
ContigAmph748	53.1467451524389	0.382768112208604	0.328508054785223	1.16517116287714	0.243949715901894	0.999936646849144
ContigAmph749	200.556704365716	-0.237871301412642	0.275701870684706	-0.862784502774277	0.388255961284481	0.999936646849144
ContigAmph750	338.100880118855	-0.0835556249597094	0.200929485090709	-0.415845513773096	0.677523051805299	0.999936646849144
ContigAmph751	379.954893705683	-0.0157734684458971	0.18443917164827	-0.0855212496615278	0.931847002569928	0.999936646849144
ContigAmph752	149.612444941058	0.113369266900692	0.21903756034534	0.517579116211629	0.604751955688355	0.999936646849144
ContigAmph753	249.209126818687	0.217228372195434	0.218299926377128	0.995091367186984	0.319691828922038	0.999936646849144
ContigAmph754	50.0587797369068	-0.0592595426564791	0.349220132652944	-0.169691083404322	0.865253086784077	0.999936646849144
ContigAmph755	514.439446225838	-0.0168035683518048	0.177860802088481	-0.0944759506000962	0.924731085624398	0.999936646849144
ContigAmph756	1413.95704906169	-0.0302416976433476	0.167582033998874	-0.180459067847039	0.856792185934951	0.999936646849144
ContigAmph757	109.922046173169	0.176681094041114	0.268670035115996	0.657613693186267	0.510786393399826	0.999936646849144
ContigAmph758	875.209841998324	0.0555446772131646	0.185578653730084	0.299305313928788	0.764707100405605	0.999936646849144
ContigAmph759	242.713678381413	-0.256388625207822	0.201345318085121	-1.27337763622311	0.202884069280861	0.999936646849144
ContigAmph760	166.824507924545	-0.251218564131824	0.270954524791044	-0.927161354199785	0.35384276458815	0.999936646849144
ContigAmph761	232.753063168604	-0.360871484716068	0.205975009822754	-1.75201586360697	0.0797710801873959	0.999936646849144
ContigAmph762	122.052420753072	0.408189404003014	0.306060806474742	1.33368727836996	0.18230636574168	0.999936646849144
ContigAmph763	244.254506938379	0.098289531296382	0.270915625270804	0.362804955225942	0.71675059000684	0.999936646849144
ContigAmph764	213.970974321898	-0.0944139140842699	0.215730898675452	-0.437646691614202	0.661642418593486	0.999936646849144
ContigAmph765	98.1100863810906	-0.040151593619909	0.477398323089264	-0.0841050160379415	0.932972936555593	0.999936646849144
ContigAmph766	179.95845648724	0.514305893317644	0.278150293409895	1.849021573958	0.0644546975748543	0.999936646849144
ContigAmph767	69.548472020792	-0.0440308741434068	0.314827503057716	-0.139857139912376	0.8887728657692	0.999936646849144
ContigAmph768	2329.42226355685	0.322976768568168	0.235032941624445	1.37417659982423	0.169386863489197	0.999936646849144
ContigAmph769	183.358666091333	-0.0454903444118342	0.235794521873292	-0.192923669517136	0.847018747654224	0.999936646849144
ContigAmph770	665.965364672024	-0.128108042991101	0.190085533688102	-0.673949461095256	0.500343444995949	0.999936646849144
ContigAmph771	229.19647075178	0.185658440327861	0.232505228778634	0.798512968087372	0.424572870687393	0.999936646849144
ContigAmph772	1612.67317200222	0.17206401088556	0.196110977597626	0.877380822804295	0.380279825834385	0.999936646849144
ContigAmph773	245.551423445413	0.12840224152534	0.25957860887075	0.494656482226831	0.620842624944555	0.999936646849144
ContigAmph774	58.2975129838815	-0.297068989966425	0.307905721606463	-0.964805033230631	0.334642474447565	0.999936646849144
ContigAmph775	19.0741085491875	-0.670171829708128	0.484353986535161	-1.38364057763253	0.166468536961451	0.999936646849144
ContigAmph776	31.6313187286542	0.106749283262372	0.390448138745974	0.273401951934577	0.78454425249928	0.999936646849144
ContigAmph777	105.57365319256	0.0668015424757353	0.250515682256675	0.266656130562282	0.789733933884686	0.999936646849144
ContigAmph778	1124.54734863169	-0.068431918609605	0.199202497135707	-0.343529421536246	0.731200210821569	0.999936646849144
ContigAmph779	123.127796148628	-0.277690073270775	0.284185137074092	-0.977144956030463	0.328497394048217	0.999936646849144
ContigAmph780	423.805816563347	-0.0372414366441919	0.173909033956846	-0.214143197721592	0.830435390131264	0.999936646849144
ContigAmph781	1650.13644742845	-0.248282679712388	0.19571374071963	-1.26860116616986	0.204583348197684	0.999936646849144
ContigAmph782	11.9627654898575	0.113720658652497	0.909981363892429	0.124970316057968	0.900547050429276	0.999936646849144
ContigAmph783	594.998029605184	-0.229024415877983	0.168803105681561	-1.35675475254601	0.174859148876127	0.999936646849144
ContigAmph784	272.231153408203	0.199372769907764	0.227110314311716	0.877867526677447	0.380015613672517	0.999936646849144
ContigAmph785	105.600443785653	0.0407228761321832	0.276861779927026	0.147087388309491	0.883063044277672	0.999936646849144
ContigAmph786	55.8425505899264	-0.0899694704108058	0.323174030265069	-0.278393255599815	0.780710496215002	0.999936646849144
ContigAmph787	122.909993632189	-0.119819018374991	0.241845306180665	-0.495436608910173	0.620291958419577	0.999936646849144
ContigAmph788	5875.95383856213	0.0167783142639144	0.141909580652832	0.118232427907465	0.905883496394986	0.999936646849144
ContigAmph789	252.077608510519	0.21480937737252	0.196054864125853	1.0956595151581	0.273227805994119	0.999936646849144
ContigAmph790	60.5295500249129	0.00672636672587248	0.355487755430776	0.0189215145194566	0.984903716507868	0.999936646849144
ContigAmph791	320.18451473392	-0.0699269642340955	0.196012658160892	-0.356747186075593	0.721281077332157	0.999936646849144
ContigAmph792	121.819106377856	-0.122416090752024	0.271106651375809	-0.451542188768843	0.651598825518476	0.999936646849144
ContigAmph794	107.713469328361	-0.110796027076964	0.27599260097198	-0.401445642697548	0.6880920508692	0.999936646849144
ContigAmph795	125.592931697439	0.292112196351888	0.232353838361169	1.25718687675747	0.208685974170103	0.999936646849144
ContigAmph796	197.76668351401	0.183656451186886	0.205908791965629	0.89193107993923	0.372429874600369	0.999936646849144
ContigAmph797	230.455155079776	0.0831344008961379	0.203692554056261	0.408136670882803	0.683173338909104	0.999936646849144
ContigAmph798	211.034547331259	-0.39250047122719	0.235383835381509	-1.66749118770636	0.0954167752381703	0.999936646849144
ContigAmph799	186.693306564116	0.28147987028694	0.228876254362244	1.22983430968527	0.218759157364739	0.999936646849144
ContigAmph800	159.669029166627	-0.108641394117379	0.264233631136927	-0.411156572499586	0.680957729691627	0.999936646849144
ContigAmph801	210.209008598344	0.122140456777266	0.225696812580425	0.541170499400573	0.588390069143086	0.999936646849144
ContigAmph802	16.172029497717	-0.486877290574617	0.538750080060366	-0.903716414334572	0.366145793065505	0.999936646849144
ContigAmph803	129.26113794621	0.104452888483719	0.402911906218833	0.259244978546223	0.795446229145118	0.999936646849144
ContigAmph804	328.103517598743	-0.150725188323576	0.194913874446448	-0.773291222862574	0.439350049061554	0.999936646849144
ContigAmph805	661.412507206633	-0.0490444886954049	0.169069253079889	-0.29008520355993	0.771751055201334	0.999936646849144
ContigAmph807	175.753992370959	0.139721389270153	0.232444309824822	0.601096191063794	0.547775920178447	0.999936646849144
ContigAmph808	2468.57449683766	0.0995949905417927	0.212232813871259	0.469272346368679	0.638874979037049	0.999936646849144
ContigAmph809	71.3779470287626	-0.0575254149997506	0.32322796933533	-0.177971649910257	0.858745240371245	0.999936646849144
ContigAmph810	158.067057632385	0.202241562819074	0.260511189993478	0.77632581857285	0.437556632348636	0.999936646849144
ContigAmph811	184.901838142466	-0.0436522790072523	0.212038136806663	-0.205869942382367	0.83689250501334	0.999936646849144
ContigAmph812	22.749407954081	-0.0154179339420209	0.478582938926925	-0.0322158035482644	0.974299953311693	0.999936646849144
ContigAmph813	3045.77080026339	-0.210644899314858	0.210370212428473	-1.00130573089799	0.316679023103884	0.999936646849144
ContigAmph814	107.397926616743	-0.221707797598945	0.264311181186571	-0.838813540175004	0.401573951306861	0.999936646849144
ContigAmph815	56.562912679974	0.0127439633153878	0.475619838708842	0.0267944317671517	0.978623694431181	0.999936646849144
ContigAmph816	448.51323509554	0.116517088195324	0.225203306960036	0.517386222112628	0.604886575664617	0.999936646849144
ContigAmph818	28.991631162179	-0.465076374575808	0.398649560791201	-1.16662959229848	0.243359987419969	0.999936646849144
ContigAmph819	159.69337018356	0.12391652718209	0.24847775526079	0.498702698968098	0.617988842944313	0.999936646849144
ContigAmph820	15.985007234027	-0.215527523191761	0.570314247570144	-0.37791011553723	0.705497367638415	0.999936646849144
ContigAmph821	12.7821671413724	-0.0840642503183525	0.59115181643098	-0.14220416478779	0.886918742198894	0.999936646849144
ContigAmph822	306.751725189602	-0.26491550163963	0.2028970328502	-1.30566473998276	0.191666593774154	0.999936646849144
ContigAmph823	110.793864522807	0.205295550037706	0.252809869949888	0.812055122999746	0.416760002275241	0.999936646849144
ContigAmph824	160.264012092247	0.0559971301397791	0.273912993962456	0.204434004132912	0.838014359790858	0.999936646849144
ContigAmph825	106.656446529012	0.0366415229029035	0.254912700531299	0.143741456689031	0.885704633409049	0.999936646849144
ContigAmph826	45.3830237098251	0.00609840611857265	0.373216647307897	0.0163401235249337	0.986963047864006	0.999936646849144
ContigAmph827	777.75798599324	0.0210096517749395	0.170888726621262	0.122943462628186	0.90215186846941	0.999936646849144
ContigAmph828	47.4437041462865	-0.281474514283321	0.409305176477819	-0.687688625649655	0.491648884289974	0.999936646849144
ContigAmph829	313.365597999116	0.0338035651127099	0.185083024497647	0.182640008204208	0.855080490299961	0.999936646849144
ContigAmph830	521.611318997051	-0.165834054408772	0.227164623274636	-0.730017077563539	0.465379745923835	0.999936646849144
ContigAmph831	18.8837304971757	0.231825372329472	0.543002684483418	0.42693227667929	0.66942865556177	0.999936646849144
ContigAmph832	314.319619750544	0.0611755529747958	0.23164506150804	0.264091764255775	0.791709209855753	0.999936646849144
ContigAmph833	895.500427094421	0.010920316237663	0.184491805753971	0.0591913347751923	0.952799711390404	0.999936646849144
ContigAmph834	163.386666940618	0.0350243024665157	0.237091186455921	0.14772502930229	0.882559777826755	0.999936646849144
ContigAmph835	40.7056132015094	0.397994164881449	0.377602130370902	1.0540040239988	0.291881074815662	0.999936646849144
ContigAmph836	32.2442657407655	0.634336455262414	0.398721835318646	1.59092479787437	0.111626501032913	0.999936646849144
ContigAmph837	41.4010614837217	0.438286050446537	0.373172764480418	1.17448563283223	0.240200563308406	0.999936646849144
ContigAmph838	151.681439665374	0.012038642542481	0.227310156790358	0.0529613049960804	0.957762738560583	0.999936646849144
ContigAmph839	20.9412801223217	-0.318659421491624	0.467633107280484	-0.681430413139021	0.495599184250153	0.999936646849144
ContigAmph840	18.0661949167277	0.460448427368687	0.534344911257129	0.861706395379366	0.388849105400656	0.999936646849144
ContigAmph841	340.565851032775	0.00870950533907768	0.182284223430148	0.0477798087798595	0.96189172843431	0.999936646849144
ContigAmph842	15.8366321638143	-0.11387571016481	0.904449850146651	-0.125906052332637	0.899806291736591	0.999936646849144
ContigAmph843	72.1137473862552	0.179513499314536	0.289723898058911	0.61960197456005	0.535519866448774	0.999936646849144
ContigAmph845	13.8563468846108	-0.303044381493777	0.692643130519062	-0.437518785852504	0.661735155180461	0.999936646849144
ContigAmph846	44.3391550686019	-0.0256614037587812	0.36678570786552	-0.0699629326020244	0.944223162810486	0.999936646849144
ContigAmph847	1276.2843315315	-0.082731669806669	0.163356316954152	-0.506449161864298	0.612541369928369	0.999936646849144
ContigAmph848	13.9477402794617	-1.00767097706194	0.677749884458083	-1.4867888585	0.13707058504965	0.999936646849144
ContigAmph849	1052.78926554175	0.23842146866708	0.26524796143984	0.898862586437467	0.368725858426039	0.999936646849144
ContigAmph850	38.4965692412686	-0.0181182506740632	0.377674166733967	-0.0479732326696986	0.961737575272387	0.999936646849144
ContigAmph851	108.035214109132	0.00670486467462951	0.254614853511826	0.0263333602975291	0.978991446461695	0.999936646849144
ContigAmph852	136.245874468233	-0.0799652874086873	0.274350316422275	-0.291471460472479	0.770690768015936	0.999936646849144
ContigAmph853	194.73794211674	0.090603258549416	0.272694405946697	0.332251988209564	0.739698990340536	0.999936646849144
ContigAmph854	290.563388167027	-0.197230756344306	0.246497629012247	-0.800132468351275	0.423634051308903	0.999936646849144
ContigAmph855	192.602677071983	-0.141230528743167	0.23441923683958	-0.602469876820798	0.546861408784315	0.999936646849144
ContigAmph856	244.64682766895	0.170291269250229	0.195028650947566	0.873160268621311	0.382575727507088	0.999936646849144
ContigAmph857	432.473689208043	0.396957765626699	0.217554106233658	1.82463927019772	0.0680554832421203	0.999936646849144
ContigAmph859	101.983557620346	0.0607794454620247	0.256909144950555	0.236579532712712	0.812983000022564	0.999936646849144
ContigAmph860	95.4991812958532	-0.095500083378042	0.25803208287697	-0.370109338006532	0.711301024665782	0.999936646849144
ContigAmph861	162.197842347048	0.382186004892283	0.215671160030263	1.77207747590663	0.0763816973098374	0.999936646849144
ContigAmph862	304.114559652496	0.193169911574713	0.212471034186335	0.909158805172969	0.363266305603577	0.999936646849144
ContigAmph863	34.0950830683255	0.0692635340201301	0.371307568368993	0.186539515809972	0.852021693501667	0.999936646849144
ContigAmph864	1097.05181784593	-0.0952309941359274	0.207246252383444	-0.459506471363025	0.645870505972613	0.999936646849144
ContigAmph866	337.64767524213	-0.204973707922136	0.210881993105423	-0.97198297921846	0.3310590162678	0.999936646849144
ContigAmph867	697.44624345192	0.231750495662571	0.232594223210481	0.996372534380845	0.319069172797425	0.999936646849144
ContigAmph868	79.7084113665966	-0.453036984815888	0.331767254647799	-1.36552652038197	0.172087623547759	0.999936646849144
ContigAmph869	33.9840646420139	-0.0683012188637806	0.389537125992177	-0.175339433153676	0.860812928509854	0.999936646849144
ContigAmph870	71.529535253224	0.226898480613117	0.276815912142387	0.81967282464747	0.412402645931987	0.999936646849144
ContigAmph871	147.649463524834	0.0186028721999653	0.268860195127494	0.069191619053701	0.944837094147168	0.999936646849144
ContigAmph872	77.8126927860402	0.144339586028912	0.282722747121675	0.510534039083856	0.609677373650596	0.999936646849144
ContigAmph873	34.7470364025369	0.136862886531477	0.384895151430493	0.355584854791794	0.722151487428646	0.999936646849144
ContigAmph874	19.3964443832948	-0.181507440738262	0.481394293380267	-0.377045268783201	0.706139963653134	0.999936646849144
ContigAmph875	298.708740623344	0.0383017904053157	0.253609461216714	0.15102666210306	0.879954683808882	0.999936646849144
ContigAmph876	148.199366943145	0.188819327497653	0.28536713089961	0.661671604933639	0.508181706330855	0.999936646849144
ContigAmph877	172.598272334019	-0.0128132564907319	0.2271533964728	-0.0564079458625491	0.955016827152743	0.999936646849144
ContigAmph878	62.9833069337636	0.00270531097767013	0.291206746125329	0.00929000105136928	0.992587758209257	0.999936646849144
ContigAmph879	127.325611384896	0.191818750267422	0.231932261370515	0.827046436463572	0.408210741985286	0.999936646849144
ContigAmph880	121.028132404635	-0.334609092465755	0.248863420577294	-1.34454911730119	0.178770884580085	0.999936646849144
ContigAmph881	38.5705217980669	0.156145001937065	0.357157829777691	0.437187677039744	0.661975245883181	0.999936646849144
ContigAmph882	376.018775802136	-0.345689006014828	0.210848843558604	-1.6395110363446	0.101106874112595	0.999936646849144
ContigAmph883	65.3750414442232	-0.129491682839262	0.331839030859923	-0.390224388323759	0.696370629038821	0.999936646849144
ContigAmph884	326.324579136102	-0.166178343052588	0.247873389160573	-0.670416229896052	0.502592491340449	0.999936646849144
ContigAmph885	159.824649334966	-0.00353084884573589	0.254478987488118	-0.0138748148937081	0.988929854599968	0.999936646849144
ContigAmph886	748.337116627755	-0.0613972941874549	0.211409412938417	-0.290418923803264	0.771495768161101	0.999936646849144
ContigAmph887	634.815396129532	-0.0889559352531144	0.164106326536011	-0.542062802396557	0.587775242662785	0.999936646849144
ContigAmph888	222.917635557507	-0.0682181098818516	0.239070450272829	-0.285347309983315	0.775378070618921	0.999936646849144
ContigAmph889	240.213467792098	-0.268060505818925	0.235896207275833	-1.13634936701412	0.255810377514061	0.999936646849144
ContigAmph890	719.571170876761	0.386138387204708	0.201090988353697	1.92021726267283	0.0548304620042783	0.999936646849144
ContigAmph891	124.986431965681	-0.141440539896574	0.253218583258917	-0.55857093139152	0.576454583169274	0.999936646849144
ContigAmph892	99.5564346858365	-0.619694241599401	0.341936066535662	-1.8123102598619	0.0699382701394082	0.999936646849144
ContigAmph893	508.557512047946	0.116854468832484	0.781790365190978	0.149470336340021	0.881182514573101	0.999936646849144
ContigAmph894	272.9454375141	-0.0141108709200144	0.214018018356499	-0.0659330977287593	0.947431089727263	0.999936646849144
ContigAmph895	390.25702685618	0.137038769432234	0.181998952213768	0.752964606473525	0.451471182931047	0.999936646849144
ContigAmph896	1073.86024024345	0.154130069418383	0.156821281869774	0.982838984484093	0.325686691557155	0.999936646849144
ContigAmph897	122.594177856195	0.0861125905168478	0.280707327324987	0.306770013228587	0.759018434401964	0.999936646849144
ContigAmph898	88.5471531398819	-0.2890348289767	0.274534480553131	-1.05281794984133	0.292424436620381	0.999936646849144
ContigAmph899	41.694158079521	-0.310113309436053	0.396152692891204	-0.782812574547409	0.433737182286727	0.999936646849144
ContigAmph900	258.252168433483	0.22034821028972	0.213043912074029	1.03428541160638	0.3010027547866	0.999936646849144
ContigAmph901	81.8585206040772	-0.0225965971686579	1.28272018930041	-0.0176161546042104	0.985945069166222	0.999936646849144
ContigAmph902	383.703122746563	0.029402423203676	0.19258924257811	0.152669083745687	0.878659242503614	0.999936646849144
ContigAmph903	220.281262073184	0.415709332567568	0.23533072088336	1.7664898616174	0.0773137009883804	0.999936646849144
ContigAmph904	668.577191778774	0.230923570788712	0.215970692467398	1.06923568263121	0.284963483830885	0.999936646849144
ContigAmph905	329.87019209924	-0.187824522834058	0.196775749965707	-0.95451051700624	0.339825288300515	0.999936646849144
ContigAmph906	506.785873662277	-0.116955497885439	0.335376716697351	-0.348728734174415	0.727292970133293	0.999936646849144
ContigAmph907	84.0498380471229	0.122898174340798	0.30464116873767	0.403419455256316	0.686639676788514	0.999936646849144
ContigAmph908	84.9916508349613	0.226708549374887	0.298168482191549	0.760337067514887	0.447053130325387	0.999936646849144
ContigAmph909	69.6458453791563	-0.159226631080634	0.302023609751528	-0.527199284889111	0.598055205222465	0.999936646849144
ContigAmph910	169.159568537971	0.0391590859080652	0.259088732328703	0.151141601396947	0.879864016256261	0.999936646849144
ContigAmph911	80.6609134990351	0.177081544627498	0.291919163554685	0.606611578599996	0.544108714396889	0.999936646849144
ContigAmph912	84.094018271825	0.139714085442474	0.263356941286809	0.530512257470054	0.595756812754349	0.999936646849144
ContigAmph913	1833.65817958456	0.0466451378816377	0.147785680427722	0.315626911529164	0.752285708640241	0.999936646849144
ContigAmph914	709.438930640971	0.0768532497383053	0.293024597840728	0.262275762187305	0.793108847100364	0.999936646849144
ContigAmph915	1439.67854796358	0.0120499424019673	0.204908316402099	0.0588065072884658	0.953106225366182	0.999936646849144
ContigAmph916	70.1552605903374	-0.266088391714331	0.332465353144734	-0.800349236987993	0.423508483423732	0.999936646849144
ContigAmph917	134.81346006228	0.0386983276986909	0.27229844185106	0.142117330659784	0.886987329234541	0.999936646849144
ContigAmph918	150.990992047356	0.0585129758055165	0.237523459183238	0.246346091483859	0.805414333191155	0.999936646849144
ContigAmph919	110.582798773215	-0.615613710295693	0.382832794684035	-1.60804852364798	0.107824551875831	0.999936646849144
ContigAmph920	26.4278644764438	0.145460567573929	0.550899017908564	0.264042161712607	0.791747430854606	0.999936646849144
ContigAmph921	1593.86558712701	-0.102951054777279	0.153338877435767	-0.671395646680699	0.50196851745755	0.999936646849144
ContigAmph922	189.634144737293	-0.0981288469566687	0.354940706065459	-0.276465463892359	0.782190582126499	0.999936646849144
ContigAmph923	437.757162487459	-0.10971383776021	0.203055993069275	-0.540313221500337	0.588981041878214	0.999936646849144
ContigAmph924	53.229515945297	-0.264045863910028	0.34643080126155	-0.762189340406475	0.44594700719161	0.999936646849144
ContigAmph925	28.0594400182766	0.126589927512043	0.434789687225786	0.29115209314131	0.770935000192581	0.999936646849144
ContigAmph926	256.200342902725	-0.0361942990567713	0.209269753048669	-0.172955233756852	0.862686615526102	0.999936646849144
ContigAmph927	166.643521069022	0.121795543969617	0.223640396876465	0.544604399163601	0.586025628493827	0.999936646849144
ContigAmph929	1000.22138018127	-0.334120412062607	0.232443259625448	-1.4374278376624	0.150596463617749	0.999936646849144
ContigAmph930	160.287431202406	0.0014982281088752	0.278936411221184	0.00537121741229822	0.995714409160554	0.999936646849144
ContigAmph931	91.9292804109944	0.208616364284568	0.257847263095219	0.809069531242333	0.418475152802529	0.999936646849144
ContigAmph932	468.214202683719	-0.216864018349681	0.18444437240592	-1.17576923340558	0.239687103997555	0.999936646849144
ContigAmph933	5599.3367052893	-0.0201057021129086	0.14524281785573	-0.138428201887955	0.889902009686851	0.999936646849144
ContigAmph934	57.4987005437313	0.200763452467821	0.352440127700826	0.569638462502891	0.568922935666082	0.999936646849144
ContigAmph935	38.7187413982487	0.0988345056866413	0.362700459852937	0.272496223817073	0.785240494417357	0.999936646849144
ContigAmph936	643.613862172254	-0.106380869677087	0.197161012342855	-0.539563417802373	0.589498150717114	0.999936646849144
[truncated: 63,536 more rows]
