# Supplementary material for: Crosstalk between nitric oxide and retinoic acid pathways is essential for amphioxus pharynx development
Source: eLife. 2021 Aug 25;10:e58295. doi: 10.7554/eLife.58295 (PMC8387019; doi:10.7554/eLife.58295)
Supplement: Figure 2—source data 1. [file elife-58295-fig2-data1.xlsx]

## Sheet: TRIM treatments
FIGURE 2B													FIGURE 2C													FIGURE 2D													FIGURE 2E
			Avg			Avg	∆Ct	∆∆Ct		2^-∆∆Ct						Avg			Avg	∆Ct	∆∆Ct		2^-∆∆Ct						Avg			Avg	∆Ct	∆∆Ct		2^-∆∆Ct						Avg			Avg	∆Ct	∆∆Ct		2^-∆∆Ct
control1	Adh3	24.9899		Rpl32	20.7366				control1	1			control1	RAR	23.6391		Rpl32	20.729				control1	1			control1	Cyp26.1	28.9527		Rpl32	20.729				control1	1			control1	NosA	35.0082		Rpl32	17.828				control1	1
control1	Adh3	25.0553	24.9761	Rpl32	20.6564	20.67	4.30618		treated1	2.53615			control1	RAR	23.9174	23.7535	Rpl32	20.7633	20.7549	2.99859		treated1	2.78738			control1	Cyp26.1	28.731	28.8584	Rpl32	20.7633	20.7549	8.10351		treated1	20.7901			control1	NosA	36.064	35.5361	Rpl32	17.8852	17.8566	17.6795		treated1	2.61269
control1	Adh3	24.8832		Rpl32	20.6169				control2	1			control1	RAR	23.7041		Rpl32	20.7725				control2	1			control1	Cyp26.1	28.8916		Rpl32	20.7725				control2	1			control2	NosA	35.5209		Rpl32	18.1073				control2	1
control2	Adh3	24.644		Rpl32	20.2711				treated2	2.35764			control2	RAR	24.4761		Rpl32	20.2629				treated2	2.21243			control2	Cyp26.1	28.564		Rpl32	20.2629				treated2	16.4605			control2	NosA	35.4998	35.5103	Rpl32	18.1307	18.119	17.3913		treated2	1.2349
control2	Adh3	24.6628	24.6011	Rpl32	20.3314	20.3064	4.29461		control3	1			control2	RAR	24.4539	24.4633	Rpl32	20.2377	20.2479	4.21532		control3	1			control2	Cyp26.1	28.3612	28.4418	Rpl32	20.2377	20.2479	8.19382		control3	1			control3	NosA	33.7163		Rpl32	17.9739				control3	1
control2	Adh3	24.4963		Rpl32	20.3169				treated3	2.60186			control2	RAR	24.4598		Rpl32	20.2433				treated3	1.89192			control2	Cyp26.1	28.4002		Rpl32	20.2433				treated3	15.7876			control3	NosA	33.175	33.4456	Rpl32	17.4451	17.7095	15.7361		treated3	2.90748
control3	Adh3	24.9797		Rpl32	19.8352								control3	RAR	23.1546		Rpl32	20.7328								control3	Cyp26.1	27.6234		Rpl32	20.7328								treated1	NosA	33.7243		Rpl32	17.8451
control3	Adh3	24.9864	24.9954	Rpl32	20.0081	19.8853	5.11008		p-value				control3	RAR	23.0808	23.1191	Rpl32	20.6993	20.707	2.4121		p-value				control3	Cyp26.1	27.8648	27.7551	Rpl32	20.6993	20.707	7.04806		p-value				treated1	NosA	34.2778	34.0011	Rpl32	17.5691	17.7071	16.294	-1.38554	p-value
control3	Adh3	25.0201		Rpl32	19.8126				0.0024				control3	RAR	23.1219		Rpl32	20.689				0.0384				control3	Cyp26.1	27.7771		Rpl32	20.689				0.0087				treated2	NosA	35.7169		Rpl32	18.6002				0.1359
treated1	Adh3	22.9716		Rpl32	20.1803								treated1	RAR	22.0551		Rpl32	20.5061								treated1	Cyp26.1	24.289		Rpl32	20.5061								treated2	NosA	35.7072	35.7121	Rpl32	18.65	18.6251	17.0869	-0.304397
treated1	Adh3	22.9367	22.9445	Rpl32	20.1767	19.9809	2.96354	-1.34264					treated1	RAR	21.9988	22.0128	Rpl32	20.5102	20.4931	1.51968	-1.47891					treated1	Cyp26.1	24.1808	24.2188	Rpl32	20.5102	20.4931	3.72569	-4.37783					treated3	NosA	32.0099		Rpl32	17.5418
treated1	Adh3	22.9251		Rpl32	19.5857								treated1	RAR	21.9845		Rpl32	20.4631								treated1	Cyp26.1	24.1866		Rpl32	20.4631								treated3	NosA	31.8278	31.9189	Rpl32	17.9033	17.7225	14.1963	-1.53977
treated2	Adh3	23.1762		Rpl32	20.103								treated2	RAR	23.3591		Rpl32	20.2463								treated2	Cyp26.1	24.3952		Rpl32	20.2463
treated2	Adh3	23.2953	23.2183	Rpl32	20.1879	20.161	3.05727	-1.23734					treated2	RAR	23.2923	23.2919	Rpl32	20.2231	20.2222	3.06969	-1.14563					treated2	Cyp26.1	24.3632	24.3751	Rpl32	20.2231	20.2222	4.15289	-4.04093					control1	NosB	23.3894		Rpl32	17.828				control1	1
treated2	Adh3	23.1832		Rpl32	20.1921								treated2	RAR	23.2242		Rpl32	20.1972								treated2	Cyp26.1	24.3668		Rpl32	20.1972								control1	NosB	23.2572	23.3233	Rpl32	17.8852	17.8566	5.46673		treated1	1.79043
treated3	Adh3	23.9713		Rpl32	20.3109								treated3	RAR	22.076		Rpl32	20.6046								treated3	Cyp26.1	23.6192		Rpl32	20.6046								control2	NosB	22.5698		Rpl32	18.1773				control2	1
treated3	Adh3	24.0362	23.9927	Rpl32	20.1875	20.2622	3.73053	-1.37954					treated3	RAR	22.069	22.085	Rpl32	20.6002	20.5927	1.49225	-0.919853					treated3	Cyp26.1	23.7252	23.6601	Rpl32	20.6002	20.5927	3.06734	-3.98072					control2	NosB	22.6331	22.6015	Rpl32	18.1307	18.154	4.44744		treated2	2.50278
treated3	Adh3	23.9708		Rpl32	20.2882								treated3	RAR	22.11		Rpl32	20.5734								treated3	Cyp26.1	23.6358		Rpl32	20.5734								control3	NosB	24.6237		Rpl32	17.9739				control3	1
																																							control3	NosB	25.3413	24.9825	Rpl32	17.4451	17.7095	7.27297		treated3	1.86883
control1	Rdh11/12	24.1149		Rpl32	20.2711				control1	1			control1	Hox1	23.8933		Rpl32	20.1126				control1	1			control1	Cyp26.2	25.4089		Rpl32	20.1126				control1	1			treated1	NosB	22.5381		Rpl32	17.8451
control1	Rdh11/12	24.0875	24.0756	Rpl32	20.3314	20.3064	3.76913		treated1	3.2069			control1	Hox1	23.9414	23.9299	Rpl32	20.1407	20.1182	3.81167		treated1	2.06526			control1	Cyp26.2	25.8066	25.5268	Rpl32	20.1407	20.1182	5.40856		treated1	2.43226			treated1	NosB	22.429	22.4835	Rpl32	17.8691	17.8571	4.62642	-0.840305	p-value
control1	Rdh11/12	24.0243		Rpl32	20.3169				control2	1			control1	Hox1	23.9549		Rpl32	20.1013				control2	1			control1	Cyp26.2	25.3648		Rpl32	20.1013				control2	1			treated2	NosB	21.6402		Rpl32	18.7002				0.0429
control2	Rdh11/12	24.3861		Rpl32	20.695				treated2	2.71892			control2	Hox1	23.9325		Rpl32	19.8171				treated2	2.59304			control2	Cyp26.2	25.6091		Rpl32	19.8171				treated2	3.59857			treated2	NosB	21.9579	21.799	Rpl32	18.65	18.6751	3.12391	-1.32353
control2	Rdh11/12	24.3476	24.5185	Rpl32	20.585	20.6098	3.90877		control3	1			control2	Hox1	23.6993	23.7733	Rpl32	19.8049	19.7911	3.98228		control3	1			control2	Cyp26.2	25.6625	25.6581	Rpl32	19.8049	19.7911	5.86706		control3	1			treated3	NosB	24.1952		Rpl32	17.5418
control2	Rdh11/12	24.8219		Rpl32	20.5493				treated3	3.22287			control2	Hox1	23.6882		Rpl32	19.7512				treated3	2.02786			control2	Cyp26.2	25.7027		Rpl32	19.7512				treated3	2.34864			treated3	NosB	23.9915	24.0933	Rpl32	17.9033	17.7225	6.37083	-0.902137
control3	Rdh11/12	24.1315		Rpl32	19.8352								control3	Hox1	22.9074		Rpl32	20.1974								control3	Cyp26.2	24.8105		Rpl32	20.1974
control3	Rdh11/12	24.2741	24.3001	Rpl32	20.0081	19.8853	4.41474		p-value				control3	Hox1	22.9304	22.9748	Rpl32	20.1001	20.1311	2.84376		p-value				control3	Cyp26.2	24.8135	24.7961	Rpl32	20.1001	20.1311	4.66503		p-value				control1	NosC	25.1272		Rpl32	17.828				control1	1
control3	Rdh11/12	24.4946		Rpl32	19.8126				0.0064				control3	Hox1	23.0866		Rpl32	20.0957				0.0214				control3	Cyp26.2	24.7643		Rpl32	20.0957				0.0471				control1	NosC	25.3103	25.2188	Rpl32	17.8852	17.8566	7.36217		treated1	1.11452
treated1	Rdh11/12	22.2398		Rpl32	20.103								treated1	Hox1	22.7905		Rpl32	19.9861								treated1	Cyp26.2	24.1269		Rpl32	19.9861								control2	NosC	24.654		Rpl32	18.1773				control2	1
treated1	Rdh11/12	22.2678	22.2489	Rpl32	20.1879	20.161	2.08795	-1.68118					treated1	Hox1	22.7383	22.7418	Rpl32	19.9457	19.9764	2.76535	-1.04632					treated1	Cyp26.2	24.0661	24.1027	Rpl32	19.9457	19.9764	4.12626	-1.2823					control2	NosC	24.5243	24.5891	Rpl32	18.1507	18.164	6.42511		treated2	1.1551
treated1	Rdh11/12	22.2392		Rpl32	20.1921								treated1	Hox1	22.6965		Rpl32	19.9976								treated1	Cyp26.2	24.1152		Rpl32	19.9976								control3	NosC	27.4244		Rpl32	17.9739				control3	1
treated2	Rdh11/12	22.883		Rpl32	20.4721								treated2	Hox1	22.5638		Rpl32	19.809								treated2	Cyp26.2	23.9383		Rpl32	19.809								control3	NosC	27.388	27.4062	Rpl32	17.6451	17.8095	9.59667		treated3	1.04781
treated2	Rdh11/12	23.4011	23.0553	Rpl32	20.9303	20.5895	2.46574	-1.44303					treated2	Hox1	22.4576	22.5069	Rpl32	20.1009	19.8993	2.60764	-1.37465					treated2	Cyp26.2	23.881	23.9189	Rpl32	20.1009	19.8993	4.01964	-1.84742					treated1	NosC	24.8001		Rpl32	17.6451
treated2	Rdh11/12	22.8817		Rpl32	20.3663								treated2	Hox1	22.4994		Rpl32	19.7881								treated2	Cyp26.2	23.9375		Rpl32	19.7881								treated1	NosC	24.8256	24.8128	Rpl32	17.5691	17.6071	7.20574	-0.156428	p-value
treated3	Rdh11/12	22.9968		Rpl32	20.3109								treated3	Hox1	22.0427		Rpl32	20.2046								treated3	Cyp26.2	23.5938		Rpl32	20.2046								treated2	NosC	24.7712		Rpl32	18.6002				na
treated3	Rdh11/12	22.9351	22.9886	Rpl32	20.1875	20.2622	2.7264	-1.68835					treated3	Hox1	21.9733	22.0156	Rpl32	20.1736	20.1918	1.82381	-1.01995					treated3	Cyp26.2	23.6714	23.625	Rpl32	20.1736	20.1918	3.43321	-1.23182					treated2	NosC	24.9133	24.8422	Rpl32	18.65	18.6251	6.21709	-0.208023
treated3	Rdh11/12	23.034		Rpl32	20.2882								treated3	Hox1	22.031		Rpl32	20.1973								treated3	Cyp26.2	23.6099		Rpl32	20.1973								treated3	NosC	27.1086		Rpl32	17.5418
																																							treated3	NosC	26.995	27.0518	Rpl32	17.5033	17.5225	9.5293	-0.0673735
control1	Aldh1a	26.9987		Rpl32	20.3235				control1	1			control1	Hox3	23.3361		Rpl32	20.1126				control1	1			control1	Cyp26.3	28.5893		Rpl32	20.1126				control1	1
control1	Aldh1a	26.9811	26.9899	Rpl32	20.3804	20.3519	6.63795		treated1	1.61513			control1	Hox3	23.2703	23.2989	Rpl32	20.1407	20.1182	3.18068		treated1	2.07553			control1	Cyp26.3	28.3237	28.4842	Rpl32	20.1407	20.1182	8.36595		treated1	39.5267
control2	Aldh1a	25.7558		Rpl32	20.4137				control2	1			control1	Hox3	23.2902		Rpl32	20.1013				control2	1			control1	Cyp26.3	28.5394		Rpl32	20.1013				control2	1
control2	Aldh1a	25.6528	25.7043	Rpl32	20.4846	20.4492	5.25512		treated2	1.76766			control2	Hox3	23.5586		Rpl32	19.8171				treated2	2.4036			control2	Cyp26.3	27.9237		Rpl32	19.8171				treated2	52.1117
control3	Aldh1a	27.8311		Rpl32	19.6942				control3	1			control2	Hox3	23.5548	23.5499	Rpl32	19.8049	19.7911	3.75883		control3	1			control2	Cyp26.3	27.7715	27.8173	Rpl32	19.8049	19.7911	8.02624		control3	1
control3	Aldh1a	27.853	27.8421	Rpl32	19.642	19.6681	8.17397		treated3	1.63618			control2	Hox3	23.5362		Rpl32	19.7512				treated3	1.92865			control2	Cyp26.3	27.7567		Rpl32	19.7512				treated3	37.2906
treated1	Aldh1a	26.4465		Rpl32	20.5366								control3	Hox3	22.2647		Rpl32	20.1974								control3	Cyp26.3	27.0774		Rpl32	20.1974
treated1	Aldh1a	26.4976	26.4721	Rpl32	20.5149	20.5258	5.9463	-0.691652	p-value				control3	Hox3	22.374	22.3173	Rpl32	20.1001	20.1311	2.18628		p-value				control3	Cyp26.3	27.0517	27.0361	Rpl32	20.1001	20.1311	6.90502		p-value
treated2	Aldh1a	25.193		Rpl32	20.7329				0.005				control3	Hox3	22.3132		Rpl32	20.0957				0.0149				control3	Cyp26.3	26.9792		Rpl32	20.0957				0.0119
treated2	Aldh1a	25.1564	25.1747	Rpl32	20.7499	20.7414	4.43328	-0.821838					treated1	Hox3	22.1293		Rpl32	19.9861								treated1	Cyp26.3	23.0874		Rpl32	19.9861
treated3	Aldh1a	27.8718		Rpl32	20.4379								treated1	Hox3	22.0982	22.1036	Rpl32	19.9457	19.9764	2.12719	-1.05348					treated1	Cyp26.3	23.0058	23.0376	Rpl32	19.9457	19.9764	3.06119	-5.30476
treated3	Aldh1a	27.847	27.8594	Rpl32	20.3536	20.3958	7.46363	-0.710332					treated1	Hox3	22.0835		Rpl32	19.9976								treated1	Cyp26.3	23.0197		Rpl32	19.9976
													treated2	Hox3	22.4071		Rpl32	19.809								treated2	Cyp26.3	22.2483		Rpl32	19.809
													treated2	Hox3	22.4378	22.3929	Rpl32	20.1009	19.8993	2.49364	-1.26519					treated2	Cyp26.3	22.1818	22.222	Rpl32	20.1009	19.8993	2.3227	-5.70354
													treated2	Hox3	22.334		Rpl32	19.7881								treated2	Cyp26.3	22.2359		Rpl32	19.7881
													treated3	Hox3	21.3804		Rpl32	20.2046								treated3	Cyp26.3	21.8505		Rpl32	20.2046
													treated3	Hox3	21.4965	21.4305	Rpl32	20.1736	20.1918	1.2387	-0.947588					treated3	Cyp26.3	21.9349	21.8761	Rpl32	20.1736	20.1918	1.68428	-5.22074
													treated3	Hox3	21.4147		Rpl32	20.1973								treated3	Cyp26.3	21.8429		Rpl32	20.1973
control1	Crabp	21.7749		Rpl32	20.4235				control1	1			control1	Meis	21.1765		Rpl32	20.1126				control1	1
control1	Crabp	21.7682	21.7632	Rpl32	20.5811	20.495	1.26819		treated1	7.21669			control1	Meis	21.1262	21.1546	Rpl32	20.1407	20.1182	1.0364		treated1	2.16113
control1	Crabp	21.7464		Rpl32	20.4804				control2	1			control1	Meis	21.1612		Rpl32	20.1013				control2	1
control2	Crabp	21.3681		Rpl32	20.8137				treated2	4.50546			control2	Meis	21.4538		Rpl32	19.8171				treated2	2.92353
control2	Crabp	21.5711	21.4696	Rpl32	20.6846	20.7492	0.720435		control3	1			control2	Meis	21.4303	21.4926	Rpl32	19.8049	19.7911	1.70152		control3	1
control3	Crabp	21.1607		Rpl32	19.6942				treated3	6.96652			control2	Meis	21.5937		Rpl32	19.7512				treated3	1.96491
control3	Crabp	21.5038	21.2937	Rpl32	19.7556	19.7306	1.5631						control3	Meis	20.3673		Rpl32	20.1974
control3	Crabp	21.2166		Rpl32	19.742				p-value				control3	Meis	20.4293	20.4171	Rpl32	20.1001	20.1311	0.286082		p-value
treated1	Crabp	18.6963		Rpl32	20.2738				0.0263				control3	Meis	20.4549		Rpl32	20.0957				0.0439
treated1	Crabp	18.9845	18.8253	Rpl32	20.4366	20.4084	-1.58315	-2.85134					treated1	Meis	19.8998		Rpl32	19.9861
treated1	Crabp	18.795		Rpl32	20.5149								treated1	Meis	19.9116	19.9011	Rpl32	19.9457	19.9764	-0.0753835	-1.11179
treated2	Crabp	19.2173		Rpl32	20.7329								treated1	Meis	19.8917		Rpl32	19.9976
treated2	Crabp	19.363	19.2902	Rpl32	20.7499	20.7414	-1.45124	-2.17168					treated2	Meis	20.0491		Rpl32	19.809
treated3	Crabp	18.9884		Rpl32	20.1555								treated2	Meis	20.0588	20.0531	Rpl32	20.1009	19.8993	0.153815	-1.54771
treated3	Crabp	19.0785	19.045	Rpl32	20.3379	20.2823	-1.23734	-2.80044					treated2	Meis	20.0514		Rpl32	19.7881
treated3	Crabp	19.0681		Rpl32	20.3536								treated3	Meis	19.4926		Rpl32	20.2046
													treated3	Meis	19.5068	19.5035	Rpl32	20.1736	20.1918	-0.688377	-0.97446
													treated3	Meis	19.5109		Rpl32	20.1973

## Sheet: RA treatments
FIGURE 2B													FIGURE 2C													FIGURE 2D													FIGURE 2E
			Avg			Avg	∆Ct	∆∆Ct		2^-∆∆Ct						Avg			Avg	∆Ct	∆∆Ct		2^-∆∆Ct						Avg			Avg	∆Ct	∆∆Ct		2^-∆∆Ct						Avg			Avg	∆Ct	∆∆Ct		2^-∆∆Ct
control1	Adh3	24.7607		Rpl32	21.1069				control1	1			control1	RAR	23.288		Rpl32	20.9937				control1	1			control1	Cyp26.1	29.0492		Rpl32	21.2964				control1	1			control1	NosA	39.1871		Rpl32	16.714				control1	1
control1	Adh3	24.771	24.8313	Rpl32	21.2076	21.055	3.7763		treated1	2.43943			control1	RAR	23.3643	23.3321	Rpl32	20.977	20.9667	2.36543		treated1	3.60838			control1	Cyp26.1	28.9329	28.9859	Rpl32	21.459	21.3777	7.60821		treated1	30.0854			control1	NosA	38.9578	39.0725	Rpl32	16.5066	16.6103	22.4622		treated1	2.62537
control1	Adh3	24.962		Rpl32	20.8504				control2	1			control1	RAR	23.344		Rpl32	20.9293				control2	1			control1	Cyp26.1	28.9755							control2	1			control2	NosA	39.7991		Rpl32	15.5929				control2	1
control2	Adh3	25.198		Rpl32	20.6535				treated2	4.10267			control2	RAR	24.2655		Rpl32	20.7387				treated2	2.87196			control2	Cyp26.1	27.9359							treated2	11.5691			control2	NosA	39.7591	39.7791	Rpl32	16.092	15.8425	23.9366		treated2	4.22581
control2	Adh3	24.9886	24.9238	Rpl32	20.6345	20.6237	4.30011		control3	1			control2	RAR	24.2187	24.2549	Rpl32	20.7218	20.7249	3.53		control3	1			control2	Cyp26.1	27.7954	27.8531	Rpl32	20.9426	20.9693	6.88379		control3	1			control3	NosA	39.1891		Rpl32	15.8303				control3	1
control2	Adh3	24.5847		Rpl32	20.5831				treated3	2.18747			control2	RAR	24.2804		Rpl32	20.7142				treated3	4.16487			control2	Cyp26.1	27.828		Rpl32	20.9961				treated3	16.4494			control3	NosA	39.0612	39.1252	Rpl32	15.872	15.8511	23.2741		treated3	3.2685
control3	Adh3	24.1182		Rpl32	20.0898								control3	RAR	22.0541		Rpl32	20.0648								control3	Cyp26.1	27.8041											treated1	NosA	38.1119		Rpl32	17.0312
control3	Adh3	23.9108	23.9855	Rpl32	20.1856	20.1332	3.85234		p-value				control3	RAR	22.3591	22.1536	Rpl32	20.0436	20.0406	2.11304		p-value				control3	Cyp26.1	28.1615	28.0347	Rpl32	20.9495	20.9059	7.12875		p-value				treated1	NosA	38.0302	38.0711	Rpl32	16.9716	17.0014	21.0697	-1.39252	p-value
control3	Adh3	23.9276		Rpl32	20.1241				0.0863				control3	RAR	22.0476		Rpl32	20.0133				0.0209				control3	Cyp26.1	28.1384		Rpl32	20.8623				0.0802				treated2	NosA	37.7138		Rpl32	15.898				0.0363
treated1	Adh3	23.2145		Rpl32	20.7898								treated1	RAR	21.1999		Rpl32	20.6706								treated1	Cyp26.1	24.011											treated2	NosA	37.5456	37.6297	Rpl32	15.6466	15.7723	21.8574	-2.07923
treated1	Adh3	23.2284	23.2113	Rpl32	20.6598	20.7215	2.48976	-1.28654					treated1	RAR	21.1939	21.1925	Rpl32	20.6651	20.6784	0.514079	-1.85135					treated1	Cyp26.1	23.7473	23.7993	Rpl32	21.1464	21.1021	2.69722	-4.91099					treated3	NosA	37.8684		Rpl32	16.5849
treated1	Adh3	23.1909		Rpl32	20.7149								treated1	RAR	21.1837		Rpl32	20.6995								treated1	Cyp26.1	23.6397		Rpl32	21.0578								treated3	NosA	38.4195	38.144	Rpl32	16.5722	16.5786	21.5654	-1.70863
treated2	Adh3	24.2588		Rpl32	20.4075								treated2	RAR	22.4817		Rpl32	20.6397								treated2	Cyp26.1	24.1379
treated2	Adh3	24.1836	24.1143	Rpl32	24.4042	21.8507	2.26354	-2.03656					treated2	RAR	22.9764	22.6336	Rpl32	20.614	20.6257	2.00797	-1.52204					treated2	Cyp26.1	24.3465	24.2122	Rpl32	20.9406	20.8606	3.35158	-3.53221					control1	NosB	23.921		Rpl32	16.5066				control1	1
treated2	Adh3	23.9004		Rpl32	20.7406								treated2	RAR	22.4427		Rpl32	20.6233								treated2	Cyp26.1	24.1521		Rpl32	20.7806								control1	NosB	23.6328	23.7769	Rpl32	16.814	16.6603	7.11659		treated1	1.99855
treated3	Adh3	23.3603		Rpl32	20.5116								treated3	RAR	20.7892		Rpl32	20.5295								treated3	Cyp26.1	24.2482											control2	NosB	23.3705		Rpl32	15.5929				control2	1
treated3	Adh3	23.3586	23.3692	Rpl32	21.0998	20.6461	2.72308	-1.12926					treated3	RAR	20.6357	20.6864	Rpl32	20.5355	20.6317	0.0547695	-2.05827					treated3	Cyp26.1	23.7261	23.9894	Rpl32	21.0084	20.9006	3.08879	-4.03997					control2	NosB	23.6061	23.4883	Rpl32	16.4294	16.0111	7.47714		treated2	2.56647
treated3	Adh3	23.3887		Rpl32	20.3269								treated3	RAR	20.6343		Rpl32	20.83								treated3	Cyp26.1	23.9938		Rpl32	20.7928								control3	NosB	23.8877		Rpl32	15.8303				control3	1
																																							control3	NosB	23.5645	23.7261	Rpl32	15.872	15.8511	7.87495		treated3	2.18449
control1	Rdh11/12	26.0232		Rpl32	20.5972				control1	1			control1	Hox1	24.6058		Rpl32	20.5972				control1	1			control1	Cyp26.2	26.5683		Rpl32	20.5972				control1	1			treated1	NosB	23.1868		Rpl32	17.0312
control1	Rdh11/12	26.0854	26.1232	Rpl32	20.6368	20.6097	5.51341		treated1	3.13742			control1	Hox1	24.5941	24.7259	Rpl32	20.6368	20.6097	4.11616		treated1	4.33078			control1	Cyp26.2	26.0547	26.1904	Rpl32	20.6368	20.6097	5.58069		treated1	5.3598			treated1	NosB	23.0513	23.119	Rpl32	16.9716	17.0014	6.11763	-0.998957	p-value
control1	Rdh11/12	26.2608		Rpl32	20.5952				control2	1			control1	Hox1	24.9778		Rpl32	20.5952				control2	1			control1	Cyp26.2	25.9483		Rpl32	20.5952				control2	1			treated2	NosB	22.1123		Rpl32	15.898				0.0174
control2	Rdh11/12	29.4153		Rpl32	20.4094				treated2	2.00576			control2	Hox1	24.822		Rpl32	20.4094				treated2	2.85512			control2	Cyp26.2	25.8982		Rpl32	20.4094				treated2	3.02531			treated2	NosB	22.0118	22.0621	Rpl32	15.9914	15.9447	6.11736	-1.35979
control2	Rdh11/12	29.709	29.6136	Rpl32	20.344	20.3671	9.24653		control3	1			control2	Hox1	24.7274	24.7494	Rpl32	20.344	20.3671	4.38231		control3	1			control2	Cyp26.2	25.8222	25.8441	Rpl32	20.344	20.3671	5.47706		control3	1			treated3	NosB	22.6867		Rpl32	15.3116
control2	Rdh11/12	29.7166		Rpl32	20.3479				treated3	3.03167			control2	Hox1	24.6988		Rpl32	20.3479				treated3	2.8912			control2	Cyp26.2	25.812		Rpl32	20.3479				treated3	4.834			treated3	NosB	22.6923	22.6895	Rpl32	16.5722	15.9419	6.74765	-1.1273
control3	Rdh11/12	30.3449		Rpl32	19.7064								control3	Hox1	23.9545		Rpl32	19.7064								control3	Cyp26.2	25.618		Rpl32	19.7064
control3	Rdh11/12	29.8612	30.1222	Rpl32	19.6701	19.6756	10.4466		p-value				control3	Hox1	24.0941	23.9672	Rpl32	19.6701	19.6756	4.29164		p-value				control3	Cyp26.2	25.4878	25.5019	Rpl32	19.6701	19.6756	5.82632		p-value				control1	NosC	23.8207		Rpl32	16.614				control1	1
control3	Rdh11/12	30.1606		Rpl32	19.6502				0.0411				control3	Hox1	23.8531		Rpl32	19.6502				0.0399				control3	Cyp26.2	25.3999		Rpl32	19.6502				0.0405				control1	NosC	23.7844	23.8026	Rpl32	16.5066	16.5603	7.2423		treated1	0.906568
treated1	Rdh11/12	24.456		Rpl32	20.7559								treated1	Hox1	22.54		Rpl32	20.7559								treated1	Cyp26.2	23.7622		Rpl32	20.7559								control2	NosC	22.2797		Rpl32	16.092				control2	1
treated1	Rdh11/12	24.3338	24.3579	Rpl32	20.5111	20.4941	3.86383	-1.64958					treated1	Hox1	22.45	22.4956	Rpl32	20.5111	20.4941	2.00154	-2.11463					treated1	Cyp26.2	23.6032	23.6526	Rpl32	20.5111	20.4941	3.15851	-2.42218					control2	NosC	22.3711	22.3254	Rpl32	16.4294	16.2607	6.06464		treated2	1.16759
treated1	Rdh11/12	24.2839		Rpl32	20.2152								treated1	Hox1	22.4968		Rpl32	20.2152								treated1	Cyp26.2	23.5923		Rpl32	20.2152								control3	NosC	24.5216		Rpl32	15.8303				control3	1
treated2	Rdh11/12	28.5048		Rpl32	20.1824								treated2	Hox1	23.0168		Rpl32	20.1824								treated2	Cyp26.2	24.0021		Rpl32	20.1824								control3	NosC	25.0724	24.797	Rpl32	15.872	15.8511	8.94588		treated3	1.12208
treated2	Rdh11/12	28.5005	28.4507	Rpl32	20.1562	20.2083	8.24238	-1.00415					treated2	Hox1	22.9762	23.0771	Rpl32	20.1562	20.2083	2.86876	-1.51355					treated2	Cyp26.2	23.9648	24.0883	Rpl32	20.1562	20.2083	3.87997	-1.59709					treated1	NosC	24.3588		Rpl32	16.9363
treated2	Rdh11/12	28.3467		Rpl32	20.2863								treated2	Hox1	23.2382		Rpl32	20.2863								treated2	Cyp26.2	24.2979		Rpl32	20.2863								treated1	NosC	24.3167	24.3377	Rpl32	16.9716	16.9539	7.38381	0.141513	p-value
treated3	Rdh11/12	29.5041		Rpl32	20.3734								treated3	Hox1	23.2906		Rpl32	20.3734								treated3	Cyp26.2	24.2127		Rpl32	20.3734								treated2	NosC	21.7096		Rpl32	15.898				na
treated3	Rdh11/12	29.0685	29.4002	Rpl32	20.6502	20.5536	8.84653	-1.60011					treated3	Hox1	23.3836	23.3136	Rpl32	20.6502	20.5536	2.75997	-1.53167					treated3	Cyp26.2	24.0329	24.1067	Rpl32	20.6502	20.5536	3.5531	-2.27322					treated2	NosC	21.5172	21.6134	Rpl32	15.6466	15.7723	5.84111	-0.22353
treated3	Rdh11/12	29.6279		Rpl32	20.6373								treated3	Hox1	23.2667		Rpl32	20.6373								treated3	Cyp26.2	24.0747		Rpl32	20.6373								treated3	NosC	24.0394		Rpl32	15.3722
																																							treated3	NosC	24.2037	24.1216	Rpl32	15.3116	15.3419	8.77971	-0.166173
control1	Aldh1a	27.2663		Rpl32	21.2057				control1	1			control1	Hox3	23.9852		Rpl32	20.5972				control1	1			control1	Cyp26.3	28.5139		Rpl32	20.9642				control1	1
control1	Aldh1a	27.2291	27.2477	Rpl32	21.454	21.3298	5.91788		treated1	1.23459			control1	Hox3	23.9449	23.9606	Rpl32	20.6368	20.6097	3.35087		treated1	2.34283			control1	Cyp26.3	28.6386	28.5269	Rpl32	21.2312	21.0846	7.44229		treated1	203.204
control2	Aldh1a	27.791		Rpl32	20.9292				control2	1			control1	Hox3	23.9517		Rpl32	20.5952				control2	1			control1	Cyp26.3	28.4283		Rpl32	21.0586				control2	1
control2	Aldh1a	27.728	27.7595	Rpl32	20.9944	20.9618	6.79766		treated2	1.01155			control2	Hox3	23.4806		Rpl32	20.4094				treated2	1.85106			control2	Cyp26.3	27.5791		Rpl32	20.7598				treated2	111.031
control3	Aldh1a	27.2871		Rpl32	20.4514				control3	1			control2	Hox3	23.4358	23.4817	Rpl32	20.344	20.3671	3.11457		control3	1			control2	Cyp26.3	27.6406	27.5734	Rpl32	20.7075	20.7749	6.79854		control3	1
control3	Aldh1a	27.1689	27.228	Rpl32	20.3382	20.3948	6.83319		treated3	1.1663			control2	Hox3	23.5286		Rpl32	20.3479				treated3	1.8901			control2	Cyp26.3	27.5004		Rpl32	20.8572				treated3	227.573
treated1	Aldh1a	26.3183		Rpl32	20.7257								control3	Hox3	22.9233		Rpl32	19.7064								control3	Cyp26.3	28.1854		Rpl32	20.2316
treated1	Aldh1a	26.3252	26.3218	Rpl32	20.6902	20.7079	5.61385	-0.30403	p-value				control3	Hox3	22.843	22.8631	Rpl32	19.6701	19.6756	3.18755		p-value				control3	Cyp26.3	28.1326	28.16	Rpl32	20.1182	20.1451	8.01497		p-value
treated2	Aldh1a	27.3402		Rpl32	20.5681				na				control3	Hox3	22.8231		Rpl32	19.6502				0.0228				control3	Cyp26.3	28.1621		Rpl32	20.0854				0.0369
treated2	Aldh1a	27.369	27.3546	Rpl32	20.5789	20.5735	6.7811	-0.0165653					treated1	Hox3	22.6133		Rpl32	20.7559								treated1	Cyp26.3	20.6238		Rpl32	20.7017
treated3	Aldh1a	27.1487		Rpl32	20.5772								treated1	Hox3	22.6481	22.6167	Rpl32	20.5111	20.4941	2.12261	-1.22825					treated1	Cyp26.3	20.4974	20.5296	Rpl32	20.6397	20.7541	-0.224497	-7.66679
treated3	Aldh1a	27.2283	27.1885	Rpl32	20.5773	20.5772	6.61125	-0.221945					treated1	Hox3	22.5887		Rpl32	20.2152								treated1	Cyp26.3	20.4677		Rpl32	20.921
													treated2	Hox3	22.4279		Rpl32	20.1824								treated2	Cyp26.3	20.9709		Rpl32	20.9689
													treated2	Hox3	22.5025	22.4345	Rpl32	20.1562	20.2083	2.22622	-0.888349					treated2	Cyp26.3	20.9488	20.9363	Rpl32	20.977	20.9326	0.00372378	-6.79482
													treated2	Hox3	22.3732		Rpl32	20.2863								treated2	Cyp26.3	20.8891		Rpl32	20.8517
													treated3	Hox3	22.9755		Rpl32	20.3734								treated3	Cyp26.3	20.7753		Rpl32	20.6226
													treated3	Hox3	22.8013	22.8227	Rpl32	20.6502	20.5536	2.26909	-0.918464					treated3	Cyp26.3	20.9194	20.8917	Rpl32	20.5836	20.7069	0.184783	-7.83019
													treated3	Hox3	22.6914		Rpl32	20.6373								treated3	Cyp26.3	20.9804		Rpl32	20.9145
control1	Crabp	24.1872		Rpl32	21.2057				control1	1			control1	Meis	21.7526		Rpl32	20.5972				control1	1
control1	Crabp	24.0467	24.0679	Rpl32	21.454	21.2255	2.84242		treated1	3.05357			control1	Meis	21.7799	21.7126	Rpl32	20.6368	20.6097	1.10286		treated1	2.51166
control1	Crabp	23.9698		Rpl32	21.0168				control2	1			control1	Meis	21.6054		Rpl32	20.5952				control2	1
control2	Crabp	21.2227		Rpl32	20.9292				treated2	2.12129			control2	Meis	21.5406		Rpl32	20.4094				treated2	1.40432
control2	Crabp	21.2133	21.1799	Rpl32	20.748	20.8906	0.28937		control3	1			control2	Meis	21.599	21.5603	Rpl32	20.344	20.3671	1.19319		control3	1
control2	Crabp	21.1038		Rpl32	20.9944				treated3	3.55193			control2	Meis	21.5413		Rpl32	20.3479				treated3	1.93103
control3	Crabp	22.2051		Rpl32	20.4514								control3	Meis	21.0284		Rpl32	19.7064
control3	Crabp	21.9882	22.0436	Rpl32	20.1918	20.3271	1.71649		p-value				control3	Meis	21.2469	21.1077	Rpl32	19.6701	19.6756	1.43214		p-value
control3	Crabp	21.9376		Rpl32	20.3382				0.045				control3	Meis	21.0478		Rpl32	19.6502				0.0973
treated1	Crabp	22.1275		Rpl32	20.7257								treated1	Meis	20.2461		Rpl32	20.7559
treated1	Crabp	21.7906	21.9533	Rpl32	20.6902	20.7214	1.23192	-1.6105					treated1	Meis	20.3602	20.2683	Rpl32	20.5111	20.4941	-0.225777	-1.32864
treated1	Crabp	21.9419		Rpl32	20.7484								treated1	Meis	20.1986		Rpl32	20.2152
treated2	Crabp	19.7207		Rpl32	20.5681								treated2	Meis	20.8494		Rpl32	20.1824
treated2	Crabp	19.9102	19.7939	Rpl32	20.6213	20.5895	-0.795575	-1.08494					treated2	Meis	20.9791	20.9116	Rpl32	20.1562	20.2083	0.703321	-0.489873
treated2	Crabp	19.7507		Rpl32	20.5789								treated2	Meis	20.9064		Rpl32	20.2863
treated3	Crabp	20.3882		Rpl32	20.5772								treated3	Meis	20.6071		Rpl32	20.3734
treated3	Crabp	20.4436	20.5365	Rpl32	20.5773	20.6486	-0.112115	-1.8286					treated3	Meis	21.6749	21.0364	Rpl32	20.6502	20.5536	0.48277	-0.949371
treated3	Crabp	20.7777		Rpl32	20.7913								treated3	Meis	20.8271		Rpl32	20.6373
